# Supplementary material for: Highly diastereo- and enantioselective synthesis of spirooxindole-cyclohexaneamides through N,N′-dioxide/Ni(ii)-catalyzed Diels–Alder reactions
Source: Royal Society of Chemistry journal article supplement (doi:10.1039/c6cc10125a), 2017-01-01
Supplement: c6cc10125a1.pdf [file c6cc10125a1.pdf]

## Electronic Supplementary Information (ESI)

### Highly diastereo- and enantioselective synthesis of spirooxindole-cyclohexaneamides through *N,N'*- dioxide/Ni(II)-catalyzed Diels–Alder reactions

Yuhang Zhou, Yan Lu, Xinyue Hu, Hongjiang Mei, Lili Lin,\* Xiaohua Liu and Xiaoming Feng\*

Key Laboratory of Green Chemistry & Technology, Ministry of Education, College of  
Chemistry, Sichuan University, Chengdu 610064, People's Republic of China.

#### CONTENTS:

|                                                                         |     |
|-------------------------------------------------------------------------|-----|
| <b>(A) General information</b> .....                                    | S2  |
| <b>(B) General procedure for asymmetric DA reactions</b> .....          | S3  |
| <b>(C) Operando IR experiments</b> .....                                | S6  |
| <b>(D) ESI-MS analysis of the solution of catalyst/substrate.</b> ..... | S7  |
| <b>(E) Spectral characterization data for the products</b> .....        | S8  |
| <b>(F) Control experiments</b> .....                                    | S44 |
| <b>(G) Copies of NMR spectra for the products</b> .....                 | S47 |
| <b>(H) Copies of CD spectra in CH<sub>2</sub>Cl<sub>2</sub></b> .....   | S83 |
| <b>(I) References</b> .....                                             | S98 |

## (A) General information

Reactions were carried out using commercial available reagents in oven-dried apparatus. CH<sub>2</sub>Cl<sub>2</sub> was dried over powdered K<sub>2</sub>CO<sub>3</sub> and distilled under nitrogen just before use. <sup>1</sup>H NMR spectra were recorded at 400 MHz. The chemical shifts were recorded in ppm relative to tetramethylsilane and with the solvent resonance as the internal standard. Data were reported as follows: chemical shift, multiplicity (s = singlet, d = doublet, t = triplet, m = multiplet, dd = doublet of doublets, td = triplet of doublets, dt = doublet of triplets, ddd = doublet of doublet of doublets), coupling constants (Hz), integration. <sup>13</sup>C NMR data were collected at 100 MHz with complete proton decoupling. Chemical shifts were reported in ppm from the tetramethylsilane with the solvent resonance as internal standard. Metal catalysts obtained from commercial sources were used without further purification. Enantiomeric excesses were determined by chiral HPLC analysis on Daicel Chiralcel IA/IB/IC/ID/IE/AD-H in comparison with the authentic racemates. Optical rotations were reported as follows:  $[\alpha]_D^{25} = (c: \text{g}/100 \text{ mL}, \text{ in solvent})$ . HRMS was recorded on a commercial apparatus (ESI Source, TOF). Chiral *N,N'*-dioxide ligands, methyleneindolinones, 1,3-dienylcarbamates and 1,2-dihydropyridines were prepared according to previously reported method.<sup>[1-4]</sup>

## (B) General procedure for asymmetric DA reactions

### 1. Representative experimental procedure for DA reaction of 1,3-dienylcarbamates and 1,2-dihydropyridines with methyleneindolinones

A mixture of methyleneindolinone **1a** (30.3 mg, 0.1 mmol), Ni(BF<sub>4</sub>)<sub>2</sub>·6H<sub>2</sub>O (3.4 mg, 0.01 mmol, 10 mol%) and *N,N'*-dioxide ligand **L-PiPr**<sub>2</sub> (6.5 mg, 0.01 mmol, 10 mol%) was weighted into a test tube under an inert atmosphere. Anhydrous CH<sub>2</sub>Cl<sub>2</sub> (1.0 mL) was added and the solution was stirred at 30 °C for 0.5 h and then stirred at 0 °C for 5 min. Subsequently, 1,3-dienylcarbamate **2a** (22.3 mg, 0.11 mmol) was added at 0 °C, and the reaction mixture was stirred for an additional 4 h. The product **3a** was purified by flash chromatography (Pet/EtOAc = 3:1).

**Table 2** Scope of other substrates for the asymmetric D–A reaction of methyleneindolinones **1** with 1,3-Dienylcarbamates **2**<sup>a</sup>

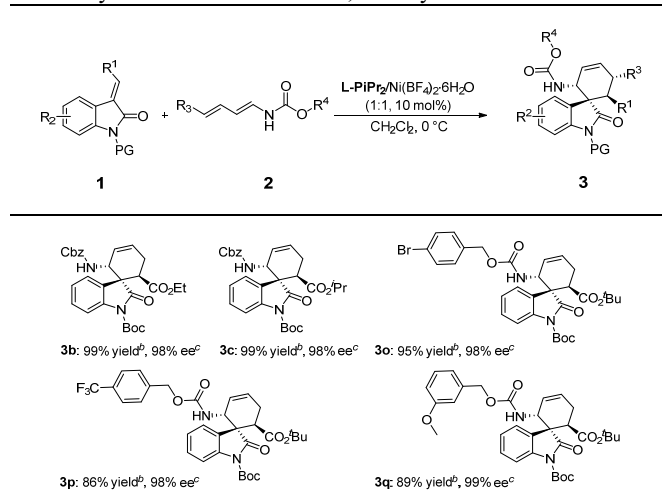

<sup>a</sup> Unless otherwise noted, the reaction was carried out with **1** (0.1 mmol), **2** (0.11 mmol), **L-PiPr**<sub>2</sub>/Ni(BF<sub>4</sub>)<sub>2</sub>·6H<sub>2</sub>O (1:1, 10 mol%) in CH<sub>2</sub>Cl<sub>2</sub> (1.0 mL) at 0 °C for 3–24 h and the dr >95:5 was determined by <sup>1</sup>H NMR analysis. <sup>b</sup> Yield of isolated product. <sup>c</sup> Determined by chiral HPLC analysis.

**Table 3** Scope of other substrates for the asymmetric D–A reaction of methyleneindolinones **1** with 1,2-dihydropyridines **4**<sup>a</sup>

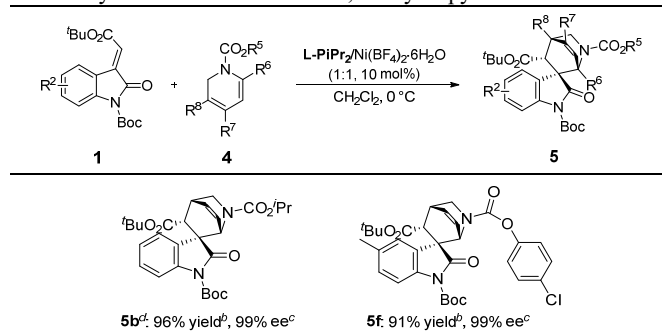

---

<sup>a</sup> Unless otherwise noted, the reaction was carried out with **1** (0.1 mmol), **4** (0.11 mmol), **L-PiPr<sub>2</sub>**/Ni(BF<sub>4</sub>)<sub>2</sub>·6H<sub>2</sub>O (1:1, 10 mol%) in CH<sub>2</sub>Cl<sub>2</sub> (1.0 mL) at 0 °C for 24-36 h and the dr >95:5 was determined by <sup>1</sup>H NMR analysis. <sup>b</sup> Yield of isolated product. <sup>c</sup> Determined by chiral HPLC analysis. <sup>d</sup> **4** (1.5 equiv, 0.15 mmol) was used.

---

## 2. General experimental procedure for the scale-up reaction

A mixture of Ni(BF<sub>4</sub>)<sub>2</sub>·6H<sub>2</sub>O (85.1 mg, 0.25 mmol, 10 mol%) and *N,N'*-dioxide ligand **L-PiPr<sub>2</sub>** (162.2 mg, 0.25 mmol, 10 mol%) was weighted into a round-bottomed flask. Then 10.0 mL anhydrous THF was added and the mixture was stirred at 30 °C for 30 min. After the solvent was removed under vacuo, methyleneindolinone **1a** (0.76 g, 2.5 mmol) were weighed into it followed by adding anhydrous CH<sub>2</sub>Cl<sub>2</sub> (25 mL). The mixture was stirred at 0 °C for for 5 min. Subsequently, 1,3-dienylcarbamate **2a** (0.56 g, 2.75 mmol) was added under 0 °C and the reaction mixture was stirred for an additional 3 h. The residue was purified by flash chromatography on silica gel (Pet/EtOAc = 3:1) to afford the desired product **3a**.

## 3. General experimental procedure for hydrogenation of **3r** and **5a**

To a solution of **3r** (51.4 mg, 0.1 mmol, 1.0 equiv) in EtOAc (2.0 mL) was added Pd/C [21.3 mg (5%), 0.01 mmol, 0.1 equiv]. Under the H<sub>2</sub> atmosphere, the mixture was allowed to stir for 4 h at 30 °C. Then, filtration followed by removal of solvent under reduced pressure and silica gel flash column flash chromatography (Pet/EtOAc = 4:1) afford **6a** (51.6 mg, 99% yield, >95:5 dr and 99% ee).

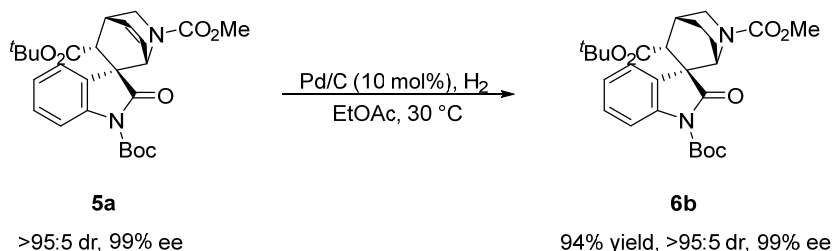

To a solution of **5a** (88.3 mg, 0.18 mmol, 1.0 equiv) in EtOAc (2.0 mL) was added Pd/C [38.2 mg (5%), 0.018 mmol, 0.1 equiv]. Under the H<sub>2</sub> atmosphere, the mixture was allowed to stir for 4 h at 30 °C. Then, filtration followed by removal of solvent

under reduced pressure and silica gel flash column flash chromatography (Pet/EtOAc = 4:1) afford **6b** (82.3 mg, 94% yield, >95:5 dr and 99% ee).

### 3. General experimental procedure for deprotection of **3d** and **5d**

To a solution of **3d** (104.5 mg, 0.19 mmol, 1.0 equiv) in CH<sub>2</sub>Cl<sub>2</sub> (2.0 mL) was added ZnBr<sub>2</sub> (85.5 mg, 0.38 mmol, 2.0 equiv). Under the N<sub>2</sub> atmosphere, the mixture was allowed to stir for 40 min at 30 °C. Then, silica gel flash column flash chromatography (Pet/EtOAc = 1:1) afford **6c** (84.4 mg, 99% yield, >95:5 dr and 98% ee).

To a solution of **3d** (54.8 mg, 0.1 mmol, 1.0 equiv) in EtOAc (2.0 mL) was added Pd/C [21.3 mg (5%), 0.01 mmol, 0.1 equiv]. Under the H<sub>2</sub> atmosphere, the mixture was allowed to stir for 4 h at 25 °C. Then, filtration followed by removal of solvent under reduced pressure and silica gel flash column flash chromatography (Pet/acetone = 4:1) afford **6d** (36.9 mg, 89% yield, 73:27 dr and 99% ee).

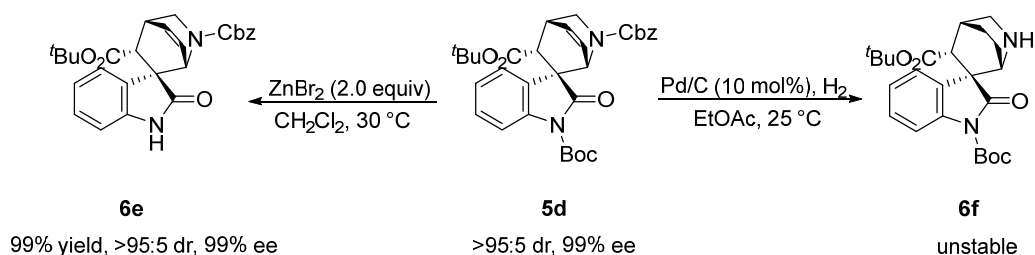

To a solution of **5d** (101.9 mg, 0.18 mmol, 1.0 equiv) in CH<sub>2</sub>Cl<sub>2</sub> (2.0 mL) was added ZnBr<sub>2</sub> (81.1 mg, 0.36 mmol, 2.0 equiv). Under the N<sub>2</sub> atmosphere, the mixture was allowed to stir for 40 min at 30 °C. Then, silica gel flash column flash chromatography (Pet/EtOAc = 1:1) afford **6e** (82.1 mg, 99% yield, >95:5 dr and 99% ee).

To a solution of **5d** (107.5 mg, 0.19 mmol, 1.0 equiv) in EtOAc (3.0 mL) was added Pd/C [40.7 mg (5%), 0.01 mmol, 0.1 equiv]. Under the H<sub>2</sub> atmosphere, the mixture was allowed to stir for 4 h at 25 °C. Then, filtration followed by removal of solvent under reduced pressure and silica gel flash column flash chromatography (EtOAc) afford **6f**. Regrettably, **6f** is very unstable and characterization data for **6f** can't be collected.

### (C) Operando IR experiments

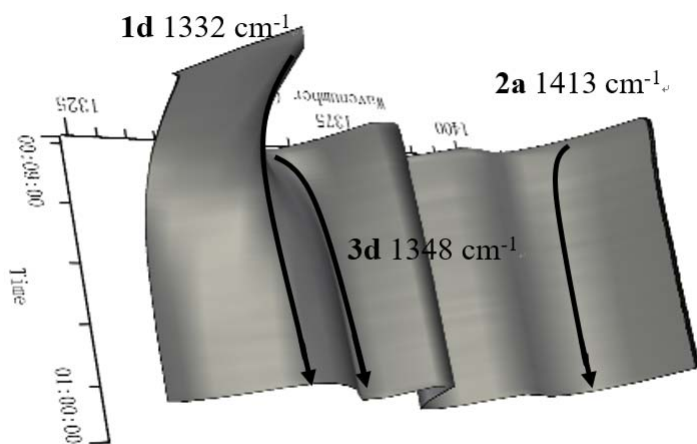

The 3D ATR-FTIR profile of the reaction.

**(D) ESI-MS analysis of the solution of catalyst/substrate.**

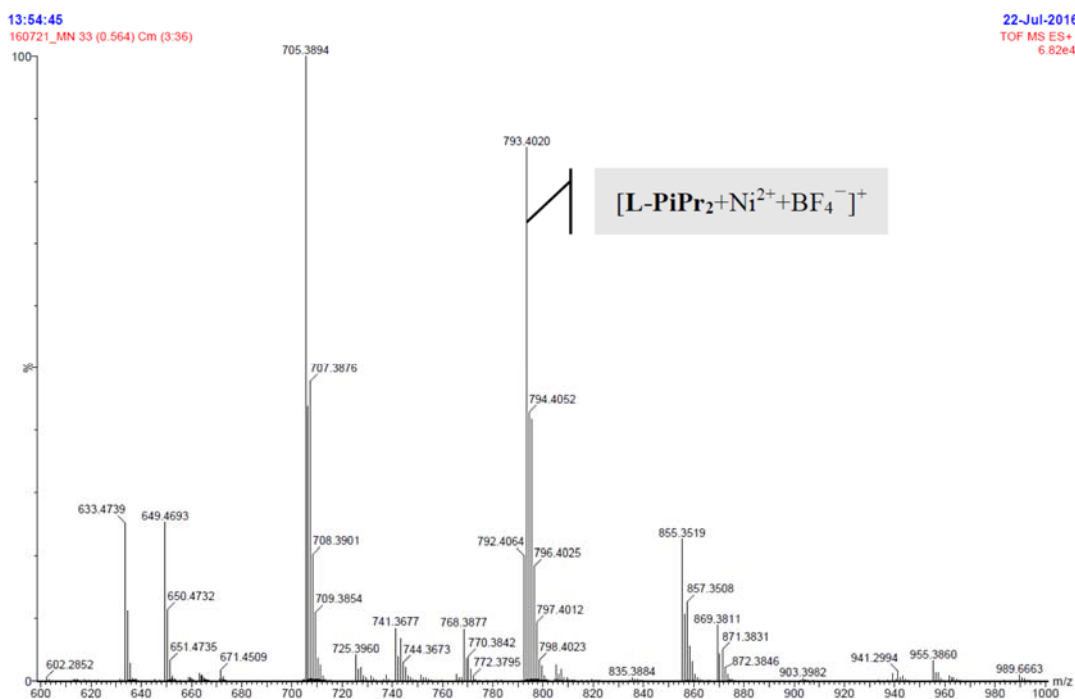

ESI-MS spectrum of a solution of  $Ni(BF_4)_2 \cdot 6H_2O$  and **L-PiPr<sub>2</sub>** in a 1:1 ratio

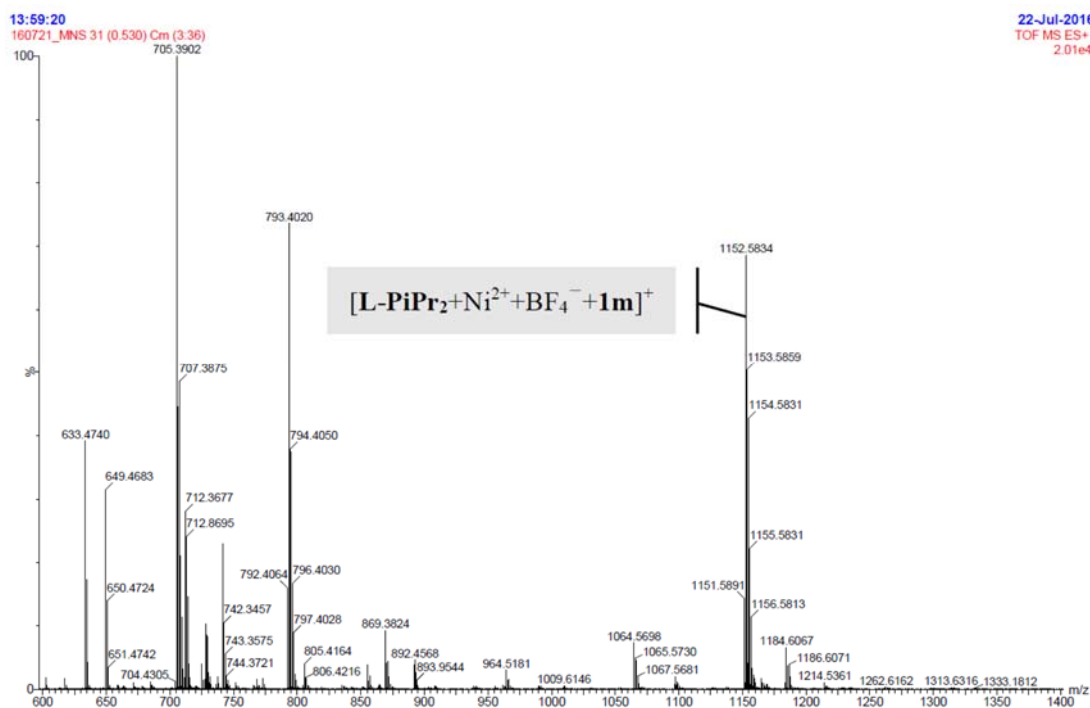

ESI-MS spectrum of a solution of **1m**,  $Ni(BF_4)_2 \cdot 6H_2O$  and **L-PiPr<sub>2</sub>** in a 1:1:1 ratio

## (E) Spectral characterization data for the products

1'-(tert-butyl) 6-methyl (1R,2R,6R)-2-(((benzyloxy)carbonyl)amino)-2'-oxospiro[cyclohexane-1,3'-indolin]-3-ene-1',6-dicarboxylate (**3a**)

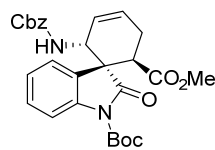

(C<sub>28</sub>H<sub>30</sub>N<sub>2</sub>O<sub>7</sub>) white amorphous solid; 99% yield, >95:5 dr, 98% ee.  $[\alpha]_D^{16} = -90.8$  (c = 1.00, in CH<sub>2</sub>Cl<sub>2</sub>), HPLC DAICEL CHIRALCEL IA, 2-propanol/*n*-hexane = 30/70, flow rate = 1.0 mL/min,  $\lambda = 254$  nm, retention time:  $t_{minor1}$ -

$t_{major} = 4.56$  min,  $t_{minor1-minor} = 5.06$  min,  $t_{major-minor} = 5.43$  min,  $t_{minor2-major} = 6.31$  min,  $t_{major-major} = 7.19$  min. <sup>1</sup>H NMR (400 MHz, CDCl<sub>3</sub>)  $\delta$  7.93 (d,  $J = 8.0$  Hz, 1H), 7.40–7.24 (m, 6H), 7.17–7.02 (m, 2H), 6.31–6.04 (m, 1H), 6.01–5.78 (m, 1H), 5.34–4.82 (m, 3H), 4.19 (dd,  $J = 10.0, 5.0$  Hz, 1H), 3.52 (s, 3H), 3.38–3.14 (m, 1H), 2.92–2.46 (m, 2H), 1.67–1.57 (m, 9H). <sup>13</sup>C NMR (100 MHz, CDCl<sub>3</sub>)  $\delta$  175.1, 172.0, 155.6, 149.2, 140.0, 136.4, 129.2, 128.6, 128.5, 128.1, 128.1, 125.3, 123.9, 123.7, 115.3, 83.8, 66.9, 52.1, 51.6, 50.9, 41.1, 28.1, 25.5. ESI-HRMS: calcd for C<sub>28</sub>H<sub>30</sub>N<sub>2</sub>O<sub>7</sub>Na<sup>+</sup> [M+Na<sup>+</sup>] 529.1945, found 529.1948.

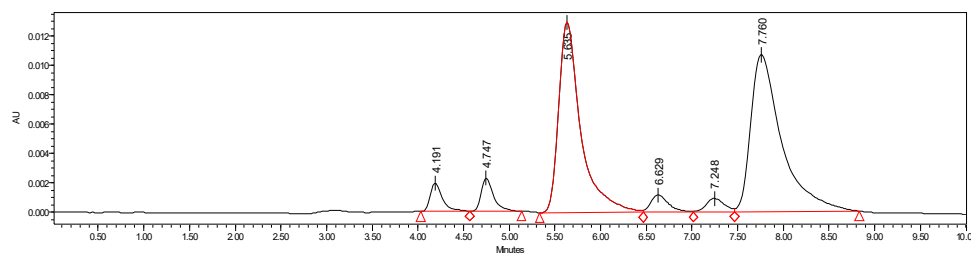

|   | Retention Time | Area   | % Area |
|---|----------------|--------|--------|
| 1 | 4.191          | 17921  | 3.36   |
| 2 | 4.747          | 20863  | 3.91   |
| 3 | 5.635          | 216722 | 40.58  |
| 4 | 6.629          | 15792  | 2.96   |
| 5 | 7.248          | 12483  | 2.34   |
| 6 | 7.760          | 250274 | 46.86  |

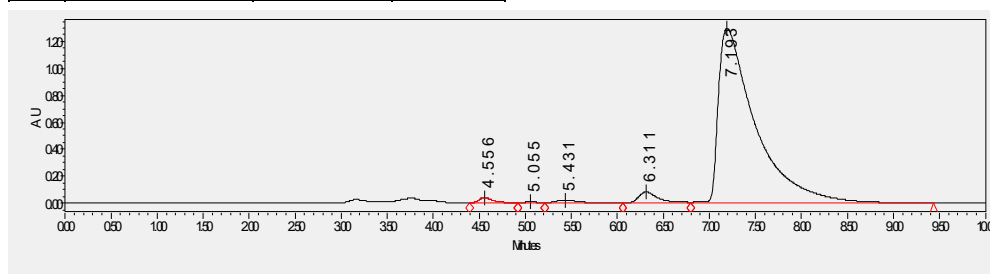

|   | Retention Time | Area   | % Area |
|---|----------------|--------|--------|
| 1 | 4.556          | 459775 | 1.19   |
| 2 | 5.055          | 92701  | 0.24   |
| 3 | 5.431          | 395924 | 1.03   |



|   |       |          |       |
|---|-------|----------|-------|
| 4 | 6.311 | 1231359  | 3.20  |
| 5 | 7.193 | 36303200 | 94.34 |

1'-(tert-butyl) 6-ethyl (1R,2R,6R)-2-(((benzyloxy)carbonyl)amino)-2'-oxospiro[cyclohexane-1,3'-indolin]-3-ene-1',6-dicarboxylate (**3b**)

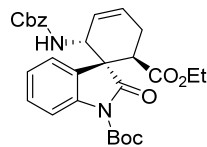

(C<sub>29</sub>H<sub>32</sub>N<sub>2</sub>O<sub>7</sub>) white amorphous solid; 99% yield, >95:5 dr, 98% ee.  $[\alpha]_D^{16} = -85.4$  (c = 0.94, in CH<sub>2</sub>Cl<sub>2</sub>), HPLC DAICEL CHIRALCEL IA, 2-propanol/*n*-hexane = 30/70, flow rate = 1.0 mL/min,  $\lambda = 254$  nm, retention time:  $t_{minor1-major} = 4.67$  min,  $t_{minor1-minor} = 5.10$  min,  $t_{major-minor} = 5.41$  min,  $t_{minor2-major} = 6.49$  min,  $t_{minor2-minor} = 6.87$  min,  $t_{major-major} = 13.28$  min.

<sup>1</sup>H NMR (400 MHz, CDCl<sub>3</sub>)  $\delta$  7.93 (d,  $J = 8.0$  Hz, 1H), 7.47–7.25 (m, 6H), 7.15–7.03 (m, 2H), 6.25–6.01 (m, 1H), 5.92–5.66 (m, 1H), 5.33–4.86 (m, 3H), 4.17 (dd,  $J = 9.0, 5.0$  Hz, 1H), 3.93 (q,  $J = 7.0$  Hz, 2H), 3.30 (dd,  $J = 11.0, 7.0$  Hz, 1H), 2.93–2.53 (m, 2H), 1.68–1.47 (m, 9H), 1.04 (t,  $J = 7.0$  Hz, 3H). <sup>13</sup>C NMR (100 MHz, CDCl<sub>3</sub>)  $\delta$  175.0, 171.6, 155.6, 149.3, 140.0, 136.4, 129.3, 128.7, 128.5, 128.5, 128.1, 128.1, 125.1, 123.9, 123.7, 115.2, 83.7, 66.9, 61.1, 51.6, 50.9, 40.9, 28.2, 25.5, 13.7. ESI-HRMS: calcd for C<sub>29</sub>H<sub>32</sub>N<sub>2</sub>O<sub>7</sub>Na<sup>+</sup> [M+Na<sup>+</sup>] 543.2102, found 543.2105.

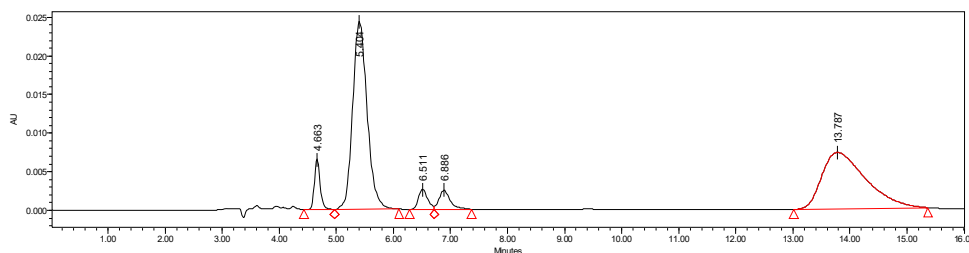

|   | Retention Time | Area   | % Area |
|---|----------------|--------|--------|
| 1 | 4.663          | 45099  | 4.86   |
| 2 | 5.404          | 426708 | 46.02  |
| 3 | 6.511          | 29602  | 3.19   |
| 4 | 6.886          | 33317  | 3.59   |
| 5 | 13.787         | 392577 | 42.34  |

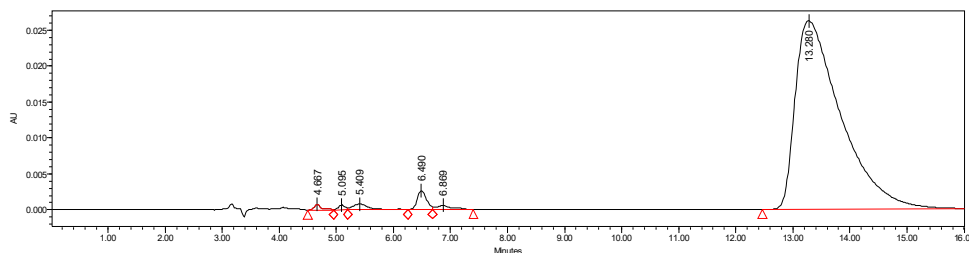

|   | Retention Time | Area | % Area |
|---|----------------|------|--------|
| 1 | 4.667          | 6670 | 0.44   |

|   |        |         |       |
|---|--------|---------|-------|
| 2 | 5.095  | 5559    | 0.36  |
| 3 | 5.409  | 16502   | 1.08  |
| 4 | 6.490  | 30253   | 1.98  |
| 5 | 6.869  | 11151   | 0.73  |
| 6 | 13.280 | 1459518 | 95.41 |

1'-(tert-butyl) 6-isopropyl (1R,2R,6R)-2-(((benzyloxy)carbonyl)amino)-2'-oxospiro[cyclohexane-1,3'-indolin]-3-ene-1',6-dicarboxylate (**3c**)

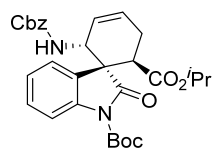

(C<sub>30</sub>H<sub>34</sub>N<sub>2</sub>O<sub>7</sub>) white amorphous solid; 99% yield, >95:5 dr, 98% ee. [ $\alpha$ ]<sub>D</sub><sup>20</sup> = -79.2 (c = 1.07, in CH<sub>2</sub>Cl<sub>2</sub>), HPLC DAICEL CHIRALCEL ID, 2-propanol/*n*-hexane = 30/70, flow rate = 1.0 mL/min,  $\lambda$  = 254 nm, retention time:  $t_{\text{major-minor}}$

= 12.20 min,  $t_{\text{minor-minor}}$  = 19.84 min,  $t_{\text{minor-major}}$  = 21.40 min,  $t_{\text{major-major}}$  = 37.97 min. <sup>1</sup>H NMR (400 MHz, CDCl<sub>3</sub>)  $\delta$  7.92 (d,  $J$  = 8.0 Hz, 1H), 7.42–7.24 (m, 6H), 7.15–7.02 (m, 2H), 6.25–6.05 (m, 1H), 5.93–5.72 (m, 1H), 5.34–4.84 (m, 3H), 4.82–4.74 (m, 1H), 4.16 (dd,  $J$  = 9.0, 5.0 Hz, 1H), 3.27 (dd,  $J$  = 11.0, 7.0 Hz, 1H), 2.88–2.50 (m, 2H), 1.68–1.47 (m, 9H), 1.05 (d,  $J$  = 6.0 Hz, 3H), 0.87 (d,  $J$  = 6.0 Hz, 3H). <sup>13</sup>C NMR (100 MHz, CDCl<sub>3</sub>)  $\delta$  174.9, 171.0, 155.6, 149.3, 139.9, 136.4, 129.4, 128.8, 128.5, 128.1, 128.0, 125.0, 123.9, 123.7, 115.0, 83.7, 68.6, 66.9, 51.5, 50.8, 40.8, 28.2, 25.5, 21.3, 21.2. ESI-HRMS: calcd for C<sub>30</sub>H<sub>34</sub>N<sub>2</sub>O<sub>7</sub>Na<sup>+</sup> [M+Na<sup>+</sup>] 557.2258, found 557.2261.

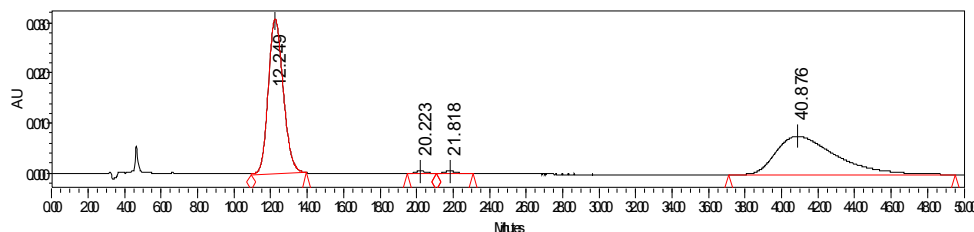

|   | Retention Time | Area    | % Area |
|---|----------------|---------|--------|
| 1 | 12.249         | 1764476 | 49.55  |
| 2 | 20.223         | 26290   | 0.74   |
| 3 | 21.818         | 28368   | 0.80   |
| 4 | 40.876         | 1742084 | 48.92  |

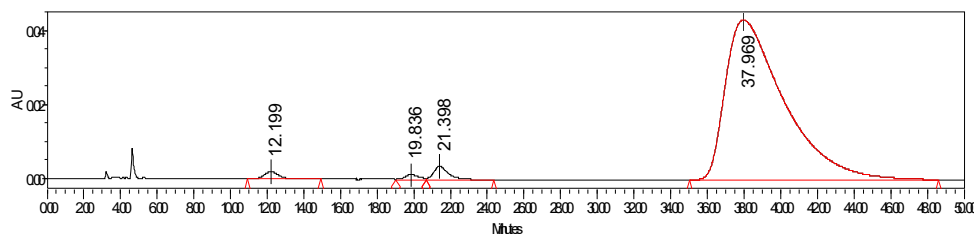

|   | Retention Time | Area   | % Area |
|---|----------------|--------|--------|
| 1 | 12.199         | 111668 | 1.12   |

|   |        |         |       |
|---|--------|---------|-------|
| 2 | 19.836 | 62364   | 0.63  |
| 3 | 21.398 | 189212  | 1.90  |
| 4 | 37.969 | 9579905 | 96.35 |

di-tert-butyl (1R,2R,6R)-2-(((benzyloxy)carbonyl)amino)-2'-oxospiro[cyclohexane-1,3'-indolin]-3-ene-1',6-dicarboxylate (**3d**)

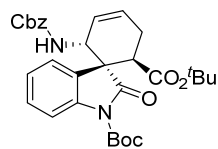

(C<sub>31</sub>H<sub>36</sub>N<sub>2</sub>O<sub>7</sub>) white amorphous solid; 99% yield, >95:5 dr, 99% ee. [α]<sub>D</sub><sup>16</sup> = -89.8 (c = 1.08, in CH<sub>2</sub>Cl<sub>2</sub>), HPLC DAICEL CHIRALCEL IB, 2-propanol/*n*-hexane = 10/90, flow rate = 1.0 mL/min, λ = 254 nm, retention time: *t*<sub>minor-major</sub>

= 4.57 min, *t*<sub>minor-minor</sub> = 5.99 min, *t*<sub>major-major</sub> = 7.32 min, *t*<sub>major-minor</sub> = 8.88 min. <sup>1</sup>H NMR (400 MHz, CDCl<sub>3</sub>) δ 7.93 (d, *J* = 8.0 Hz, 1H), 7.37–7.26 (m, 6H), 7.15–7.03 (m, 2H), 6.18–6.08 (m, 1H), 5.88–5.78 (m, 1H), 5.22–4.77 (m, 3H), 4.15 (dd, *J* = 10.0, 5.0 Hz, 1H), 3.21 (dd, *J* = 11.0, 7.0 Hz, 1H), 2.78–2.55 (m, 2H), 1.66–1.48 (m, 9H), 1.15 (s, 9H). <sup>13</sup>C NMR (100 MHz, CDCl<sub>3</sub>) δ 174.8, 170.7, 155.6, 149.3, 139.8, 136.4, 129.5, 128.9, 128.5, 128.1, 128.0, 124.7, 123.9, 123.7, 115.0, 83.7, 81.9, 66.9, 51.5, 51.1, 41.1, 28.1, 27.5, 25.4. ESI-HRMS: calcd for C<sub>31</sub>H<sub>36</sub>N<sub>2</sub>O<sub>7</sub>Na<sup>+</sup> [M+Na<sup>+</sup>] 571.2415, found 571.2420.

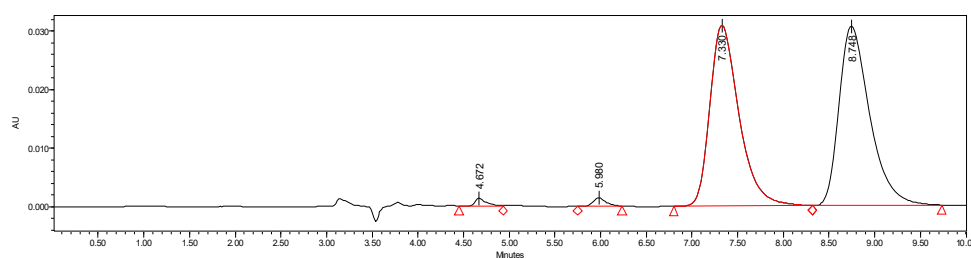

|   | Retention Time | Area   | % Area |
|---|----------------|--------|--------|
| 1 | 4.672          | 11552  | 0.82   |
| 2 | 5.980          | 13178  | 0.93   |
| 3 | 7.330          | 680110 | 48.06  |
| 4 | 8.748          | 710380 | 50.20  |

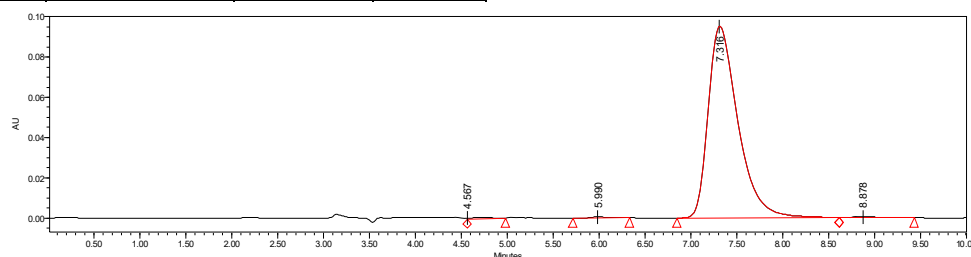

|   | Retention Time | Area    | % Area |
|---|----------------|---------|--------|
| 1 | 4.567          | 7818    | 0.36   |
| 2 | 5.990          | 6908    | 0.32   |
| 3 | 7.316          | 2149966 | 98.73  |

|   |       |       |      |
|---|-------|-------|------|
| 4 | 8.878 | 12890 | 0.59 |
|---|-------|-------|------|

tert-butyl (1R,2R,6R)-6-benzoyl-2-(((benzyloxy)carbonyl)amino)-2'-oxospiro[cyclohexane-1,3'-indolin]-3-ene-1'-carboxylate (**3e**)

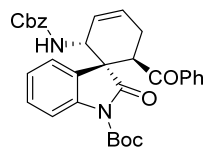

(C<sub>33</sub>H<sub>32</sub>N<sub>2</sub>O<sub>6</sub>) white amorphous solid; 99% yield, >95:5 dr, 96% ee. [ $\alpha$ ]<sub>D</sub><sup>21</sup> =

-76.5 (c = 0.87, in CH<sub>2</sub>Cl<sub>2</sub>), HPLC DAICEL CHIRALCEL IA, 2-propanol/*n*-

hexane = 30/70, flow rate = 1.0 mL/min,  $\lambda$  = 254 nm, retention time:  $t_{minor}$  =

4.72 min,  $t_{major}$  = 6.82 min. <sup>1</sup>H NMR (400 MHz, CDCl<sub>3</sub>)  $\delta$  7.99 (d, *J* = 8.0 Hz, 1H), 7.79 (d, *J* = 8.0

Hz, 1H), 7.54–7.48 (m, 1H), 7.43–7.24 (m, 8H), 7.18–7.02 (m, 2H), 6.22–6.03 (m, 1H), 5.99–5.79

(m, 1H), 5.29 (d, *J* = 9.0 Hz, 1H), 5.17–4.84 (m, 2H), 4.43–4.13 (m, 2H), 2.93–2.68 (m, 1H), 2.54–

2.32 (m, 1H), 1.66–1.36 (m, 9H). <sup>13</sup>C NMR (100 MHz, CDCl<sub>3</sub>)  $\delta$  199.6, 175.5, 155.6, 149.2, 139.8,

136.4, 136.0, 133.2, 129.6, 129.2, 128.6, 128.6, 128.5, 128.2, 128.1, 126.0, 123.9, 123.8, 115.3, 83.8,

67.0, 52.1, 51.5, 44.5, 28.1, 27.1. ESI-HRMS: calcd for C<sub>33</sub>H<sub>32</sub>N<sub>2</sub>O<sub>6</sub>Na<sup>+</sup> [M+Na<sup>+</sup>] 575.2153, found

575.2156.

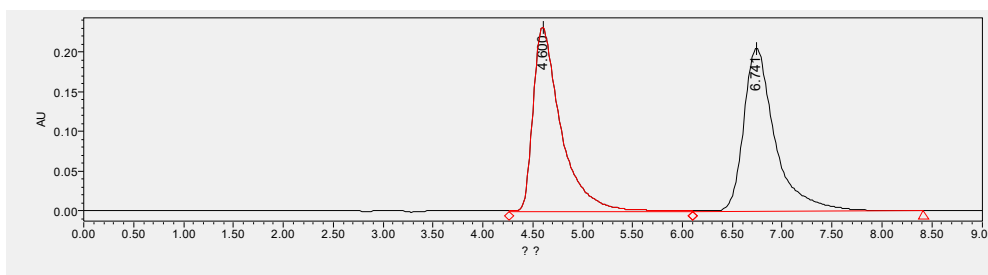

|   | Retention Time | Area    | % Area |
|---|----------------|---------|--------|
| 1 | 4.600          | 4555700 | 50.33  |
| 2 | 6.741          | 4496544 | 49.67  |

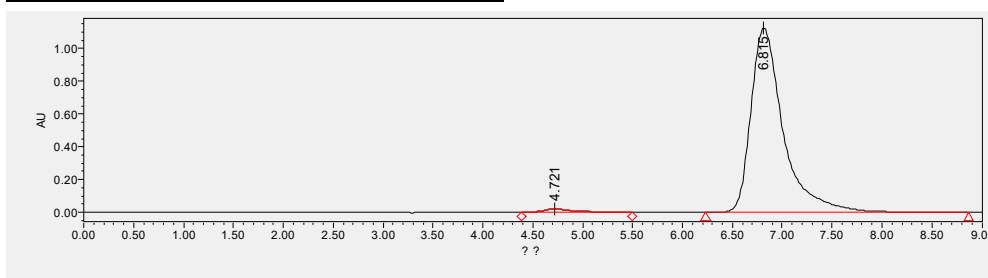

|   | Retention Time | Area     | % Area |
|---|----------------|----------|--------|
| 1 | 4.721          | 456812   | 1.77   |
| 2 | 6.815          | 25330384 | 98.23  |

di-tert-butyl (1R,2R,6R)-2-(((benzyloxy)carbonyl)amino)-5'-fluoro-2'-oxospiro[cyclohexane-1,3'-indolin]-3-ene-1',6-dicarboxylate (**3f**)

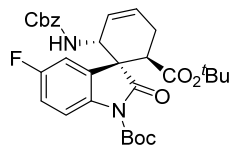

(C<sub>31</sub>H<sub>35</sub>FN<sub>2</sub>O<sub>7</sub>) white amorphous solid; 91% yield, >95:5 dr, 95% ee. [ $\alpha$ ]<sub>D</sub><sup>19</sup> = -75.7 (c = 1.03, in CH<sub>2</sub>Cl<sub>2</sub>), HPLC DAICEL CHIRALCEL IB, 2-propanol/*n*-hexane = 10/90, flow rate = 1.0 mL/min,  $\lambda$  = 254 nm, retention

time:  $t_{\text{major-major}}$  = 6.92 min,  $t_{\text{major-minor}}$  = 8.26 min,  $t_{\text{minor-minor}}$  = 10.50 min,  $t_{\text{minor-major}}$  = 11.56 min. <sup>1</sup>H NMR (400 MHz, CDCl<sub>3</sub>)  $\delta$  7.92 (dd,  $J$  = 9.0 Hz, 5.0 Hz, 1H), 7.47–7.26 (m, 5H), 7.01 (td,  $J$  = 9.0 Hz, 3.0 Hz, 1H), 6.87 (dd,  $J$  = 8.0 Hz, 3.0 Hz, 1H), 6.23–6.10 (m, 1H), 5.88–5.76 (m, 1H), 5.24–4.74 (m, 3H), 4.12 (dd,  $J$  = 10.0, 5.0 Hz, 1H), 3.22 (dd,  $J$  = 11.0, 7.0 Hz, 1H), 2.82–2.49 (m, 2H), 1.66–1.46 (m, 9H), 1.18 (s, 9H). <sup>13</sup>C NMR (100 MHz, CDCl<sub>3</sub>)  $\delta$  174.3, 170.5, 160.7, 158.3, 155.6, 149.3, 136.3, 135.9, 130.6 (d,  $J$  = 8.0 Hz), 129.7, 128.5, 128.2, 128.1, 124.6, 116.2 (d,  $J$  = 8.0 Hz), 114.7 (d,  $J$  = 22.0 Hz), 111.5 (d,  $J$  = 25 Hz), 83.8, 82.1, 67.0, 51.5, 51.3 (d,  $J$  = 2.0 Hz), 41.2, 28.1, 27.5, 25.4. ESI-HRMS: calcd for C<sub>31</sub>H<sub>35</sub>FN<sub>2</sub>O<sub>7</sub>Na<sup>+</sup> [M+Na<sup>+</sup>] 589.2321, found 589.2311.

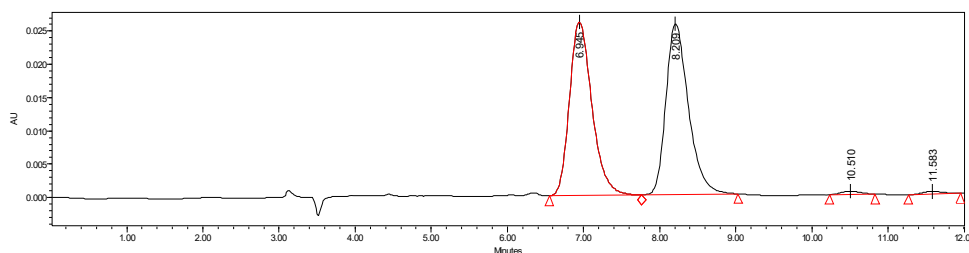

|   | Retention Time | Area   | % Area |
|---|----------------|--------|--------|
| 1 | 6.945          | 534619 | 49.50  |
| 2 | 8.209          | 529336 | 49.01  |
| 3 | 10.510         | 8102   | 0.75   |
| 4 | 11.583         | 8012   | 0.74   |

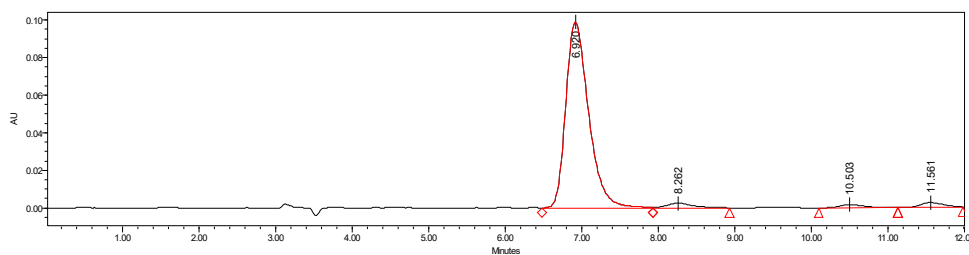

|   | Retention Time | Area    | % Area |
|---|----------------|---------|--------|
| 1 | 6.920          | 2052987 | 93.17  |
| 2 | 8.262          | 58300   | 2.65   |
| 3 | 10.503         | 38027   | 1.73   |
| 4 | 11.561         | 54093   | 2.45   |

di-tert-butyl (1R,2R,6R)-2-(((benzyloxy)carbonyl)amino)-5'-chloro-2'-oxospiro[cyclohexane-1,3'-indolin]-3-ene-1',6-dicarboxylate (**3g**)

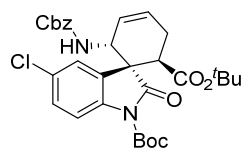

(C<sub>31</sub>H<sub>35</sub>ClN<sub>2</sub>O<sub>7</sub>) white amorphous solid; 99% yield, >95:5 dr, 94% ee. [α]<sub>D</sub><sup>20</sup> = -72.1 (c = 1.17, in CH<sub>2</sub>Cl<sub>2</sub>), HPLC DAICEL CHIRALCEL IB, 2-propanol/*n*-hexane = 10/90, flow rate = 1.0 mL/min, λ = 254 nm, retention

time:  $t_{major-major}$  = 6.89 min,  $t_{major-minor}$  = 8.00 min,  $t_{minor-minor}$  = 9.72,  $t_{minor-major}$  = 10.36 min. <sup>1</sup>H NMR (400 MHz, CDCl<sub>3</sub>) δ 7.90 (d, *J* = 8.0 Hz, 1H), 7.40–7.26 (m, 6H), 7.08 (d, *J* = 2.0 Hz, 1H), 6.23–6.11 (m, 1H), 5.89–5.78 (m, 1H), 5.20–4.72 (m, 3H), 4.11 (dd, *J* = 10.0, 5.0 Hz, 1H), 3.21 (dd, *J* = 12.0, 7.0 Hz, 1H), 2.81–2.49 (m, 2H), 1.66–1.46 (m, 9H), 1.19 (s, 9H). <sup>13</sup>C NMR (100 MHz, CDCl<sub>3</sub>) δ 174.0, 170.5, 155.6, 149.2, 138.5, 136.3, 130.7, 129.8, 129.2, 128.5, 128.4, 128.2, 128.1, 124.5, 123.9, 116.2, 84.0, 82.1, 67.0, 51.5, 51.2, 41.2, 28.1, 27.6, 25.5. ESI-HRMS: calcd for C<sub>31</sub>H<sub>35</sub><sup>34.9689</sup>ClN<sub>2</sub>O<sub>7</sub>Na<sup>+</sup> [M+Na<sup>+</sup>] 605.2025, found 605.2025; ESI-HRMS: calcd for C<sub>31</sub>H<sub>35</sub><sup>36.9659</sup>ClN<sub>2</sub>O<sub>7</sub>Na<sup>+</sup> [M+Na<sup>+</sup>] 607.1995, found 607.2026.

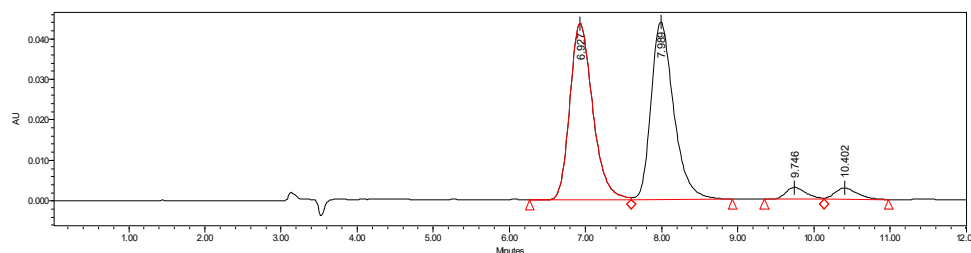

|   | Retention Time | Area   | % Area |
|---|----------------|--------|--------|
| 1 | 6.927          | 907789 | 47.11  |
| 2 | 7.989          | 904489 | 46.93  |
| 3 | 9.746          | 55342  | 2.87   |
| 4 | 10.402         | 59504  | 3.09   |

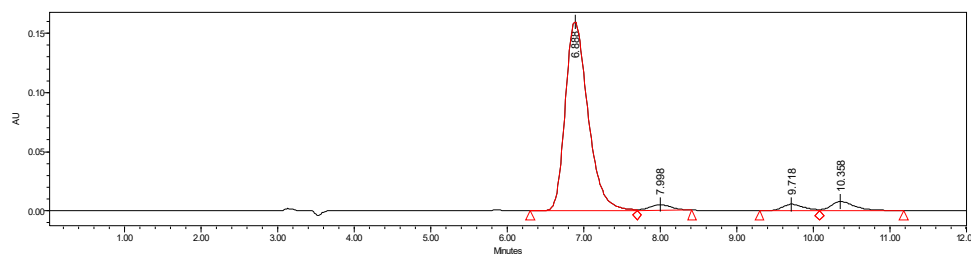

|   | Retention Time | Area    | % Area |
|---|----------------|---------|--------|
| 1 | 6.888          | 3279032 | 90.10  |
| 2 | 7.998          | 95686   | 2.63   |
| 3 | 9.718          | 101157  | 2.78   |
| 4 | 10.358         | 163646  | 4.50   |

di-tert-butyl (1R,2R,6R)-2-(((benzyloxy)carbonyl)amino)-6'-chloro-2'-oxospiro[cyclohexane-1,3'-indolin]-3-ene-1',6-dicarboxylate (**3h**)

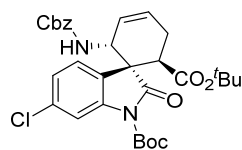

(C<sub>31</sub>H<sub>35</sub>ClN<sub>2</sub>O<sub>7</sub>) white amorphous solid; 92% yield, >95:5 dr, 96% ee. [ $\alpha$ ]<sub>D</sub><sup>20</sup> = -85.0 (c = 1.08, in CH<sub>2</sub>Cl<sub>2</sub>), HPLC DAICEL CHIRALCEL IB, 2-propanol/*n*-hexane = 10/90, flow rate = 1.0 mL/min,  $\lambda$  = 254 nm, retention time:  $t_{major}$  = 7.33 min,  $t_{minor}$  = 8.43 min.

<sup>1</sup>H NMR (400 MHz, CDCl<sub>3</sub>)  $\delta$  8.02 (s, 1H), 7.38–7.26 (m, 5H), 7.04 (d,  $J$  = 1.0 Hz, 2H), 6.19–6.10 (m, 1H), 5.86–5.75 (m, 1H), 5.29–4.81 (m, 3H), 4.12 (dd,  $J$  = 10.0, 5.0 Hz, 1H), 3.20 (dd,  $J$  = 11.0, 7.0 Hz, 1H), 2.80–2.49 (m, 2H), 1.65–1.47 (m, 9H), 1.19 (s, 9H). <sup>13</sup>C NMR (100 MHz, CDCl<sub>3</sub>)  $\delta$  174.2, 170.5, 155.6, 149.1, 140.8, 136.3, 134.2, 129.7, 128.5, 128.2, 128.1, 127.4, 124.6, 124.6, 123.9, 115.7, 84.2, 82.1, 67.0, 51.6, 51.0, 41.2, 28.1, 27.6, 25.5. ESI-HRMS: calcd for C<sub>31</sub>H<sub>35</sub><sup>34.9689</sup>ClN<sub>2</sub>O<sub>7</sub>Na<sup>+</sup> [M+Na<sup>+</sup>] 605.2025, found 605.2036; ESI-HRMS: calcd for C<sub>31</sub>H<sub>35</sub><sup>36.9659</sup>ClN<sub>2</sub>O<sub>7</sub>Na<sup>+</sup> [M+Na<sup>+</sup>] 607.1995, found 607.2025.

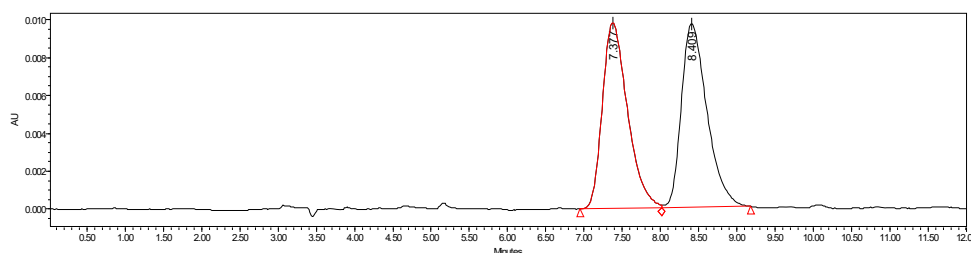

|   | Retention Time | Area   | % Area |
|---|----------------|--------|--------|
| 1 | 7.377          | 226201 | 50.11  |
| 2 | 8.409          | 225220 | 49.89  |

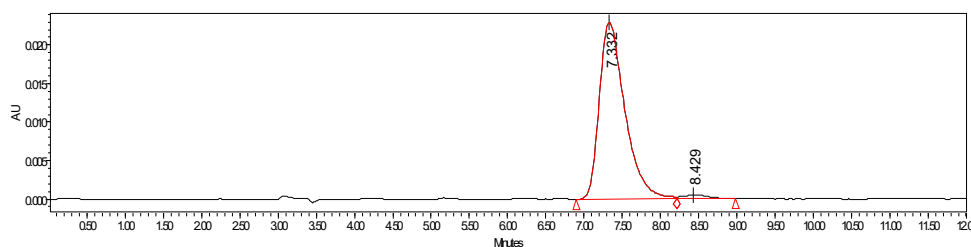

|   | Retention Time | Area   | % Area |
|---|----------------|--------|--------|
| 1 | 7.332          | 538195 | 97.77  |
| 2 | 8.429          | 12268  | 2.23   |

di-tert-butyl (1R,2R,6R)-2-(((benzyloxy)carbonyl)amino)-6'-bromo-2'-oxospiro[cyclohexane-1,3'-indolin]-3-ene-1',6-dicarboxylate (**3i**)

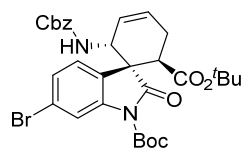

(C<sub>31</sub>H<sub>35</sub>BrN<sub>2</sub>O<sub>7</sub>) white amorphous solid; 99% yield, >95:5 dr, 97% ee. [α]<sub>D</sub><sup>21</sup> = -79.7 (c = 1.25, in CH<sub>2</sub>Cl<sub>2</sub>), HPLC DAICEL CHIRALCEL IB, 2-propanol/*n*-hexane = 10/90, flow rate = 1.0 mL/min, λ = 254 nm, retention

time: *t*<sub>major</sub> = 7.56 min, *t*<sub>minor</sub> = 8.74 min. <sup>1</sup>H NMR (400 MHz, CDCl<sub>3</sub>) δ 8.18 (d, *J* = 2.0 Hz, 1H), 7.40–7.26 (m, 5H), 7.20 (dd, *J* = 8.0 Hz, 2.0 Hz, 1H), 6.99 (d, *J* = 8.0 Hz, 1H), 6.17–6.10 (m, 1H), 5.84–5.77 (m, 1H), 5.15–4.75 (m, 3H), 4.12 (dd, *J* = 10.0, 5.0 Hz, 1H), 3.20 (dd, *J* = 11.0, 7.0 Hz, 1H), 2.80–2.48 (m, 2H), 1.66–1.50 (m, 9H), 1.19 (s, 9H). <sup>13</sup>C NMR (100 MHz, CDCl<sub>3</sub>) δ 174.1, 170.5, 155.6, 149.1, 141.0, 136.3, 129.7, 128.5, 128.2, 128.1, 127.9, 126.8, 124.9, 124.6, 122.2, 118.5, 84.2, 82.1, 67.0, 51.5, 51.0, 41.2, 28.1, 27.6, 25.5. ESI-HRMS: calcd for C<sub>31</sub>H<sub>35</sub><sup>78,9183</sup>BrN<sub>2</sub>O<sub>7</sub>Na<sup>+</sup> [M+Na<sup>+</sup>] 649.1520, found 649.1528; ESI-HRMS: calcd for C<sub>31</sub>H<sub>35</sub><sup>80,9163</sup>BrN<sub>2</sub>O<sub>7</sub>Na<sup>+</sup> [M+Na<sup>+</sup>] 651.1500, found 651.1516.

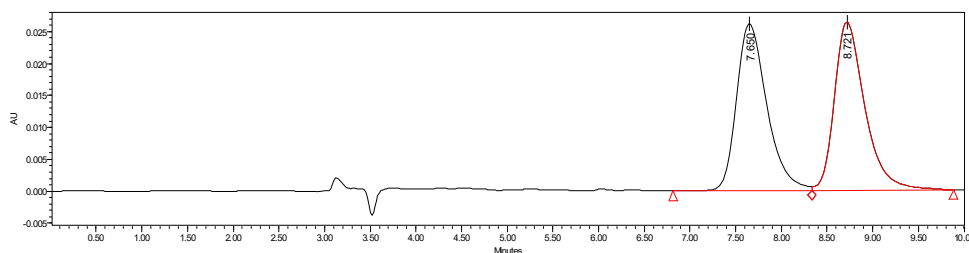

|   | Retention Time | Area   | % Area |
|---|----------------|--------|--------|
| 1 | 7.650          | 601547 | 49.72  |
| 2 | 8.721          | 608315 | 50.28  |

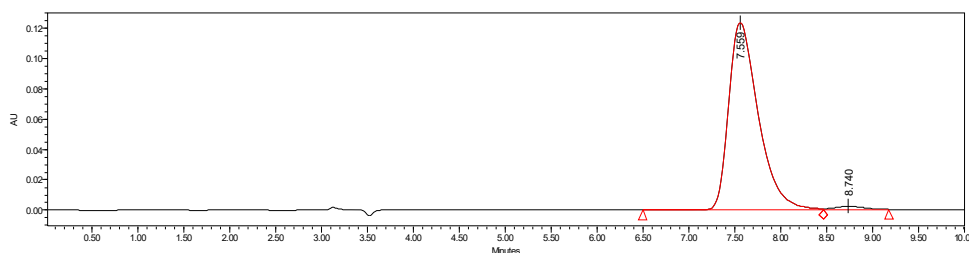

|   | Retention Time | Area    | % Area |
|---|----------------|---------|--------|
| 1 | 7.559          | 2768968 | 98.34  |
| 2 | 8.740          | 46780   | 1.66   |



di-tert-butyl (1R,2R,6R)-2-(((benzyloxy)carbonyl)amino)-7'-bromo-2'-oxospiro[cyclohexane-1,3'-indolin]-3-ene-1',6-dicarboxylate (**3j**)

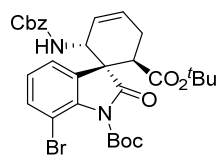

(C<sub>31</sub>H<sub>35</sub>BrN<sub>2</sub>O<sub>7</sub>) white powder, mp 124.0–126.0 °C; 90% yield, >95:5 dr, 99%

ee.  $[\alpha]_D^{33} = -63.9$  (c = 0.87, in CH<sub>2</sub>Cl<sub>2</sub>), HPLC DAICEL CHIRALCEL IA, 2-propanol/*n*-hexane = 30/70, flow rate = 1.0 mL/min,  $\lambda = 254$  nm, retention

time:  $t_{minor} = 5.38$  min,  $t_{major} = 8.60$  min. <sup>1</sup>H NMR (400 MHz, CDCl<sub>3</sub>)  $\delta$  7.47 (d,  $J = 8.0$  Hz, 1H), 7.38–7.26 (m, 5H), 7.11 (d,  $J = 4.0$  Hz, 1H), 6.93 (t,  $J = 8.0$  Hz, 1H), 6.26–5.97 (m, 1H), 5.91–5.51 (m, 1H), 5.31–4.70 (m, 3H), 4.25 (dd,  $J = 10.0, 5.0$  Hz, 1H), 3.19 (dd,  $J = 11.0, 7.0$  Hz, 1H), 2.81–2.48 (m, 2H), 1.74–1.46 (m, 9H), 1.30–1.13 (m, 9H). <sup>13</sup>C NMR (100 MHz, CDCl<sub>3</sub>)  $\delta$  174.9, 170.4, 155.6, 147.5, 138.9, 136.4, 133.3, 132.4, 129.6, 128.5, 128.1, 128.0, 124.9, 124.7, 122.9, 107.2, 84.7, 82.3, 66.9, 52.1, 51.4, 41.3, 27.8, 27.5, 25.4. ESI-HRMS: calcd for C<sub>31</sub>H<sub>35</sub><sup>78,9183</sup>BrN<sub>2</sub>O<sub>7</sub>Na<sup>+</sup> [M+Na<sup>+</sup>] 649.1520, found 649.1532; ESI-HRMS: calcd for C<sub>31</sub>H<sub>35</sub><sup>80,9163</sup>BrN<sub>2</sub>O<sub>7</sub>Na<sup>+</sup> [M+Na<sup>+</sup>] 651.1500, found 651.1520.

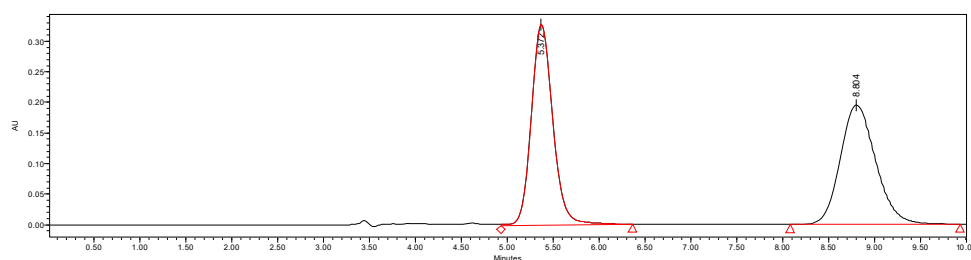

|   | Retention Time | Area    | % Area |
|---|----------------|---------|--------|
| 1 | 5.372          | 5327949 | 50.29  |
| 2 | 8.804          | 5265858 | 49.71  |

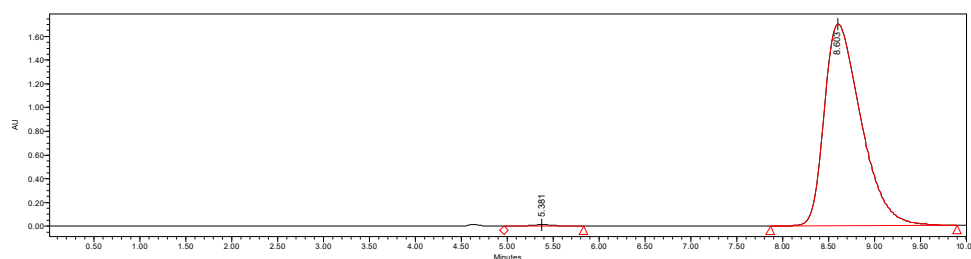

|   | Retention Time | Area     | % Area |
|---|----------------|----------|--------|
| 1 | 5.381          | 188902   | 0.40   |
| 2 | 8.603          | 47493328 | 99.60  |

di-tert-butyl (1R,2R,6R)-2-(((benzyloxy)carbonyl)amino)-5'-iodo-2'-oxospiro[cyclohexane-1,3'-indolin]-3-ene-1',6-dicarboxylate (**3k**)

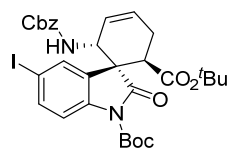

( $C_{31}H_{35}IN_2O_7$ ) white amorphous solid; 99% yield, 93:7 dr, 93% ee.  $[\alpha]_D^{20} =$

$-69.3$  ( $c = 1.35$ , in  $CH_2Cl_2$ ), HPLC DAICEL CHIRALCEL IB, 2-propanol/ $n$ -

hexane = 5/95, flow rate = 1.0 mL/min,  $\lambda = 254$  nm, retention time:  $t_{major-major}$

= 11.70 min,  $t_{major-minor} = 13.54$  min,  $t_{minor-major\&minor} = 17.22$  min.  $^1H$  NMR (400 MHz,  $CDCl_3$ )  $\delta$

7.79–7.57 (m, 2H), 7.47–7.26 (m, 6H), 6.25–5.99 (m, 1H), 5.90–5.58 (m, 1H), 5.29–4.75 (m, 3H),

4.24–4.03 (m, 1H), 3.20 (dd,  $J = 11.0, 7.0$  Hz, 1H), 2.86–2.44 (m, 2H), 1.66–1.42 (m, 9H), 1.19 (s,

8.37H), 1.18 (s, 0.63H).  $^{13}C$  NMR (100 MHz,  $CDCl_3$ )  $\delta$  173.8, 170.5, 155.6, 149.1, 139.7, 137.3,

136.3, 132.3, 131.5, 129.8, 128.5, 128.2, 128.1, 124.6, 117.1, 87.3, 84.0, 82.1, 67.0, 51.5, 51.1, 41.2,

28.1, 27.6, 25.4. ESI-HRMS: calcd for  $C_{31}H_{35}IN_2O_7Na^+$   $[M+Na^+]$  697.1381, found 697.1390.

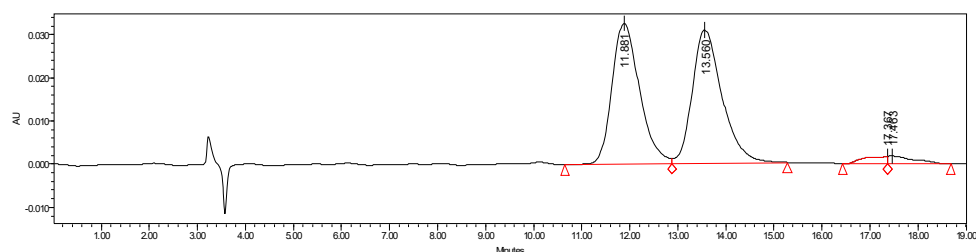

|   | Retention Time | Area    | % Area |
|---|----------------|---------|--------|
| 1 | 11.881         | 1306807 | 47.21  |
| 2 | 13.560         | 1329172 | 48.02  |
| 3 | 17.367         | 60581   | 2.19   |
| 4 | 17.463         | 71594   | 2.59   |

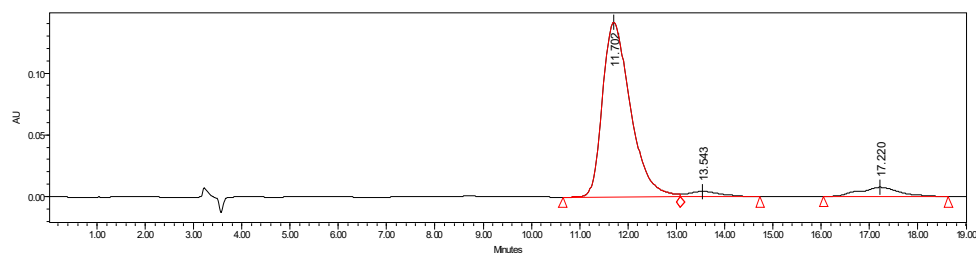

|   | Retention Time | Area    | % Area |
|---|----------------|---------|--------|
| 1 | 11.702         | 5702585 | 89.78  |
| 2 | 13.543         | 209794  | 3.30   |
| 3 | 17.220         | 439032  | 6.91   |

di-tert-butyl (1R,2R,6R)-2-(((benzyloxy)carbonyl)amino)-5',6'-difluoro-2'-oxospiro[cyclohexane-1,3'-indolin]-3-ene-1',6-dicarboxylate (**31**)

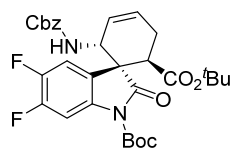

(C<sub>31</sub>H<sub>34</sub>F<sub>2</sub>N<sub>2</sub>O<sub>7</sub>) light yellow amorphous solid; 99% yield, >95:5 dr, 98% ee.

$[\alpha]_D^{20} = -81.2$  (c = 1.17, in CH<sub>2</sub>Cl<sub>2</sub>), HPLC DAICEL CHIRALCEL IB, 2-propanol/*n*-hexane = 10/90, flow rate = 1.0 mL/min,  $\lambda = 254$  nm, retention

time:  $t_{major} = 7.11$  min,  $t_{minor} = 8.40$  min. <sup>1</sup>H NMR (400 MHz, CDCl<sub>3</sub>)  $\delta$  7.89 (dd,  $J = 12.0$  Hz, 7.0 Hz, 1H), 7.38–7.26 (m, 5H), 6.96 (dd,  $J = 10.0$  Hz, 8.0 Hz, 1H), 6.23–6.11 (m, 1H), 5.89–5.75 (m, 1H), 5.22–4.70 (m, 3H), 4.10 (dd,  $J = 10.0, 6.0$  Hz, 1H), 3.19 (dd,  $J = 11.0, 7.0$  Hz, 1H), 2.83–2.45 (m, 2H), 1.64–1.46 (m, 9H), 1.21 (s, 9H). <sup>13</sup>C NMR (100 MHz, CDCl<sub>3</sub>)  $\delta$  173.9, 170.4, 155.6, 149.0, 136.2, 136.0, 129.8, 128.5, 128.2, 128.1, 124.6, 113.1 (d,  $J = 21$  Hz), 105.7 (d,  $J = 24$  Hz), 84.3, 82.2, 67.1, 51.6, 51.0, 41.2, 29.1, 27.6, 25.4. ESI-HRMS: calcd for C<sub>31</sub>H<sub>34</sub>F<sub>2</sub>N<sub>2</sub>O<sub>7</sub>Na<sup>+</sup> [M+Na<sup>+</sup>] 607.2226, found 607.2231.

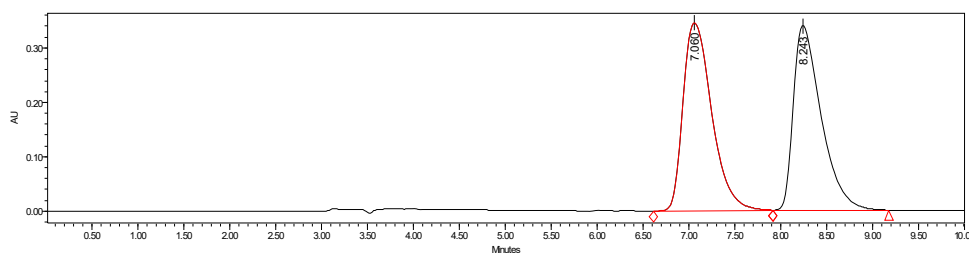

|   | Retention Time | Area    | % Area |
|---|----------------|---------|--------|
| 1 | 7.060          | 7577353 | 51.39  |
| 2 | 8.243          | 7167569 | 48.61  |

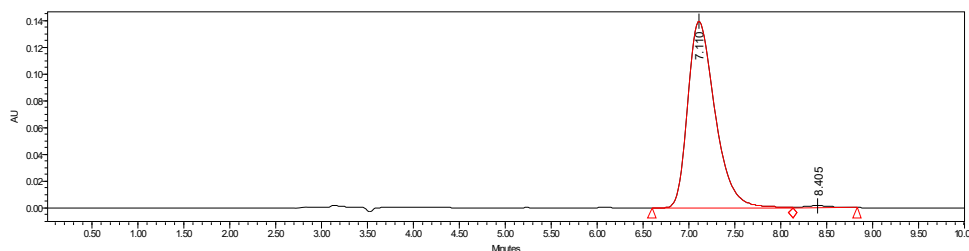

|   | Retention Time | Area    | % Area |
|---|----------------|---------|--------|
| 1 | 7.110          | 2894690 | 98.95  |
| 2 | 8.405          | 30660   | 1.05   |

di-tert-butyl (1R,2R,6R)-2-(((benzyloxy)carbonyl)amino)-5'-methyl-2'-oxospiro[cyclohexane-1,3'-indolin]-3-ene-1',6-dicarboxylate (**3m**)

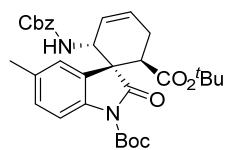

(C<sub>32</sub>H<sub>38</sub>N<sub>2</sub>O<sub>7</sub>) white powder, mp 165.0–167.0 °C; 97% yield, >95:5 dr, 99% ee.  $[\alpha]_D^{18} = -81.3$  (c = 1.09, in CH<sub>2</sub>Cl<sub>2</sub>), HPLC DAICEL CHIRALCEL IB, 2-propanol/*n*-hexane = 10/90, flow rate = 1.0 mL/min,  $\lambda = 254$  nm, retention time:  $t_{major} = 6.99$  min,  $t_{minor} = 8.51$  min. <sup>1</sup>H NMR (400 MHz, CDCl<sub>3</sub>)  $\delta$  7.79 (d,  $J = 8.0$  Hz, 1H), 7.40–7.24 (m, 5H), 7.10 (dd,  $J = 8.0, 2.0$  Hz, 1H), 6.92 (s, 1H), 6.24–6.06 (m, 1H), 5.95–5.77 (m, 1H), 5.35–4.77 (m, 3H), 4.14 (dd,  $J = 10.0, 6.0$  Hz, 1H), 3.19 (dd,  $J = 11.0, 7.0$  Hz, 1H), 2.83–2.53 (m, 2H), 2.29 (s, 3H), 1.67–1.44 (m, 9H), 1.16 (s, 9H). <sup>13</sup>C NMR (100 MHz, CDCl<sub>3</sub>)  $\delta$  174.9, 170.7, 155.6, 149.3, 137.4, 136.4, 133.4, 129.3, 128.9, 128.4, 128.1, 128.0, 124.8, 124.3, 114.7, 83.5, 81.9, 66.9, 51.5, 51.1, 41.2, 28.2, 27.5, 25.3, 21.3. ESI-HRMS: calcd for C<sub>32</sub>H<sub>38</sub>N<sub>2</sub>O<sub>7</sub>Na<sup>+</sup> [M+Na<sup>+</sup>] 585.2571, found 585.2577.

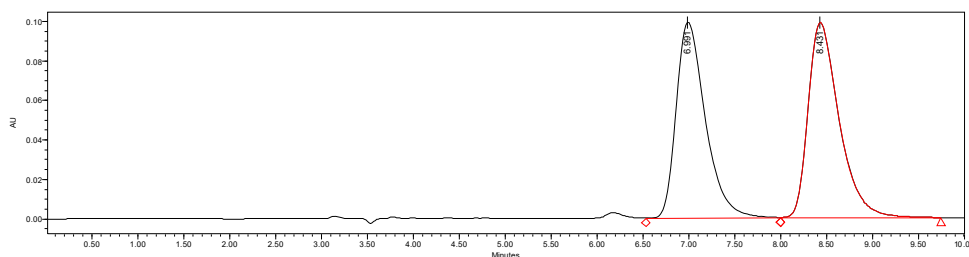

|   | Retention Time | Area    | % Area |
|---|----------------|---------|--------|
| 1 | 6.991          | 2200051 | 48.61  |
| 2 | 8.431          | 2325432 | 51.39  |

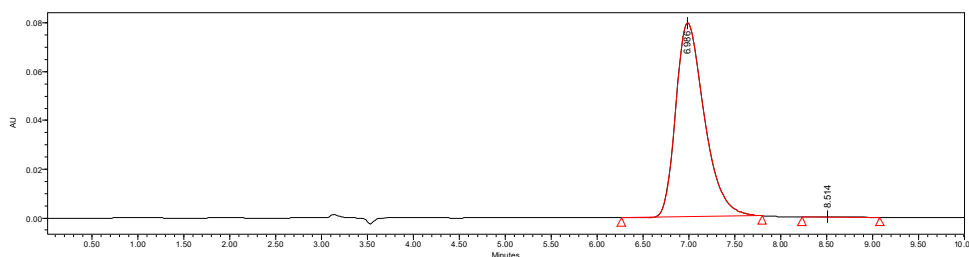

|   | Retention Time | Area    | % Area |
|---|----------------|---------|--------|
| 1 | 6.986          | 1723490 | 99.71  |
| 2 | 8.514          | 5063    | 0.29   |

di-tert-butyl (1R,2R,6R)-2-(((benzyloxy)carbonyl)amino)-5'-methoxy-2'-oxospiro[cyclohexane-1,3'-indolin]-3-ene-1',6-dicarboxylate (**3n**)

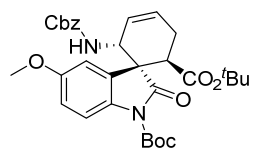

( $C_{32}H_{38}N_2O_8$ ) white amorphous solid; 87% yield, >95:5 dr, 98% ee.  $[\alpha]_D^{19}$  = -78.6 ( $c = 1.00$ , in  $CH_2Cl_2$ ), HPLC DAICEL CHIRALCEL IB, 2-propanol/*n*-hexane = 10/90, flow rate = 1.0 mL/min,  $\lambda = 254$  nm, retention

time:  $t_{major} = 8.62$  min,  $t_{minor} = 10.35$  min.  $^1H$  NMR (400 MHz,  $CDCl_3$ )  $\delta$  7.85 (d,  $J = 8.0$  Hz, 1H), 7.40–7.26 (m, 5H), 6.82 (dd,  $J = 9.0, 2.0$  Hz, 1H), 6.74 (d,  $J = 3.0$  Hz, 1H), 6.13 (dd,  $J = 13.0, 4.0$  Hz, 1H), 5.89–5.72 (m, 1H), 5.33–4.78 (m, 3H), 4.21–4.09 (m, 1H), 3.76 (s, 3H), 3.20 (dd,  $J = 11.0, 7.0$  Hz, 1H), 2.79–2.48 (m, 2H), 1.66–1.45 (m, 9H), 1.18 (s, 9H).  $^{13}C$  NMR (100 MHz,  $CDCl_3$ )  $\delta$  174.7, 170.6, 156.3, 155.6, 149.4, 136.4, 133.3, 130.3, 129.4, 128.5, 128.1, 128.0, 124.8, 115.6, 111.9, 111.4, 83.5, 81.9, 66.9, 55.6, 51.5, 51.2, 41.2, 28.2, 27.5, 25.4. ESI-HRMS: calcd for  $C_{32}H_{38}N_2O_8Na^+$   $[M+Na^+]$  601.2520, found 601.2530.

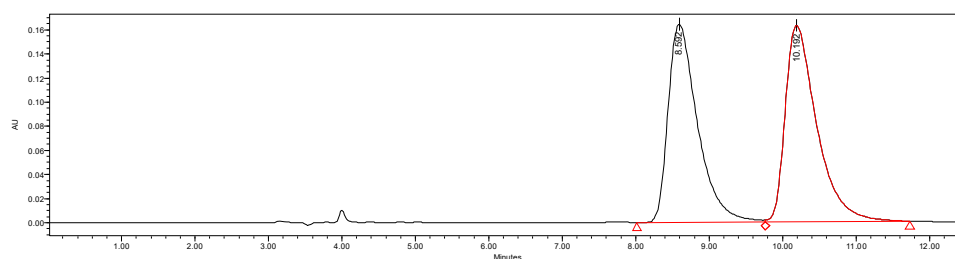

|   | Retention Time | Area    | % Area |
|---|----------------|---------|--------|
| 1 | 8.592          | 4569116 | 48.58  |
| 2 | 10.192         | 4836519 | 51.42  |

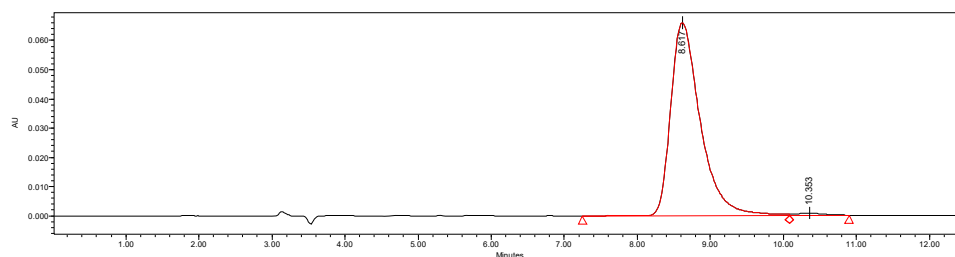

|   | Retention Time | Area    | % Area |
|---|----------------|---------|--------|
| 1 | 8.617          | 1854271 | 98.92  |
| 2 | 10.353         | 20179   | 1.08   |

di-tert-butyl (1R,2R,6R)-2-(((4-bromobenzyl)oxy)carbonyl)amino)-2'-oxospiro[cyclohexane-1,3'-indolin]-3-ene-1',6-dicarboxylate (**30**)

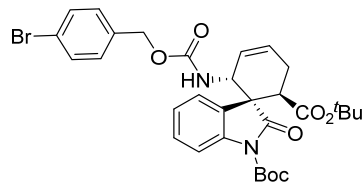

(C<sub>31</sub>H<sub>35</sub>BrN<sub>2</sub>O<sub>7</sub>) white amorphous solid; 95% yield, >95:5 dr, 98%

ee.  $[\alpha]_D^{33} = -75.3$  (c = 1.15, in CH<sub>2</sub>Cl<sub>2</sub>), HPLC DAICEL

CHIRALCEL IB, 2-propanol/*n*-hexane = 10/90, flow rate = 1.0

mL/min,  $\lambda = 254$  nm, retention time:  $t_{major} = 10.51$  min,  $t_{minor} =$

13.41 min. <sup>1</sup>H NMR (400 MHz, CDCl<sub>3</sub>)  $\delta$  7.91 (d, *J* = 8.0 Hz, 1H), 7.46 (d, *J* = 8.0 Hz, 2H), 7.34–

7.27 (m, 1H), 7.26–7.01 (m, 4H), 6.26–6.04 (m, 1H), 5.94–5.64 (m, 1H), 5.23–4.77 (m, 3H), 4.13

(dd, *J* = 10.0, 5.0 Hz, 1H), 3.21 (dd, *J* = 11.0, 7.0 Hz, 1H), 2.88–2.48 (m, 2H), 1.68–1.45 (m, 9H),

1.15 (s, 9H). <sup>13</sup>C NMR (100 MHz, CDCl<sub>3</sub>)  $\delta$  174.8, 170.6, 155.4, 149.2, 139.7, 135.5, 131.6, 129.7,

129.6, 128.9, 128.5, 124.6, 123.9, 123.7, 122.0, 115.0, 83.7, 81.9, 66.0, 51.5, 51.1, 41.1, 28.1, 27.5,

25.4. ESI-HRMS: calcd for C<sub>31</sub>H<sub>35</sub><sup>78,9183</sup>BrN<sub>2</sub>O<sub>7</sub>Na<sup>+</sup> [M+Na<sup>+</sup>] 649.1520, found 649.1525; ESI-

HRMS: calcd for C<sub>31</sub>H<sub>35</sub><sup>80,9163</sup>BrN<sub>2</sub>O<sub>7</sub>Na<sup>+</sup> [M+Na<sup>+</sup>] 651.1500, found 651.1512.

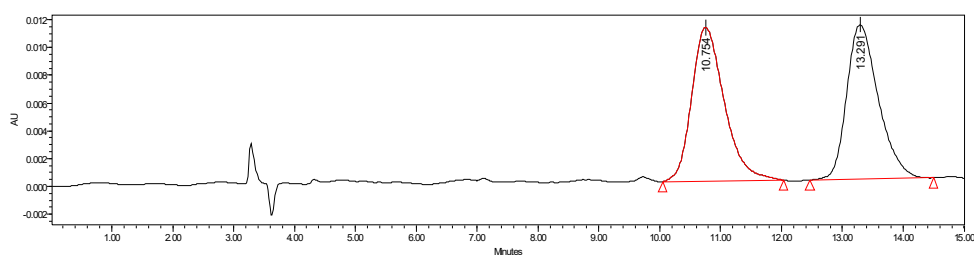

|   | Retention Time | Area   | % Area |
|---|----------------|--------|--------|
| 1 | 10.754         | 412349 | 50.71  |
| 2 | 13.291         | 400820 | 49.29  |

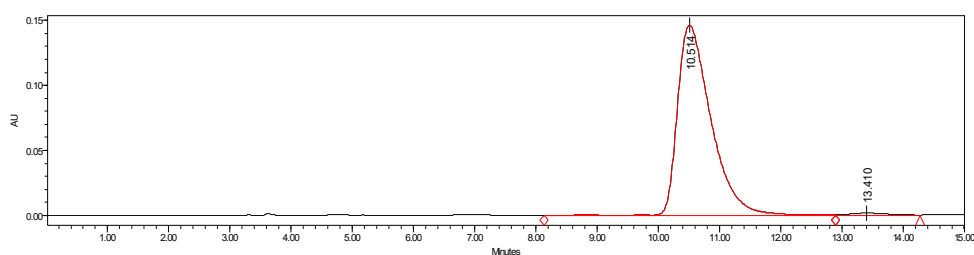

|   | Retention Time | Area    | % Area |
|---|----------------|---------|--------|
| 1 | 10.514         | 5530236 | 98.93  |
| 2 | 13.410         | 59738   | 1.07   |

di-tert-butyl (1R,2R,6R)-2'-oxo-2-(((4-(trifluoromethyl)benzyl)oxy)carbonyl)amino)spiro [cyclohexane-1,3'-indolin]-3-ene-1',6-dicarboxylate (**3p**)

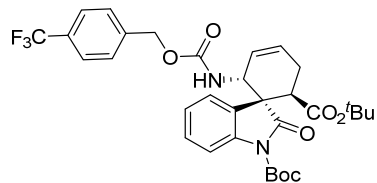

(C<sub>32</sub>H<sub>35</sub>F<sub>3</sub>N<sub>2</sub>O<sub>7</sub>) light yellow amorphous solid; 86% yield, >95:5 dr, 98% ee. [α]<sub>D</sub><sup>33</sup> = -67.3 (c = 1.04, in CH<sub>2</sub>Cl<sub>2</sub>), HPLC DAICEL CHIRALCEL ID, 2-propanol/*n*-hexane = 10/90, flow rate = 1.0 mL/min, λ = 254 nm, retention time: *t*<sub>major</sub> = 7.31 min, *t*<sub>minor</sub> =

9.49 min. <sup>1</sup>H NMR (400 MHz, CDCl<sub>3</sub>) δ 7.91 (d, *J* = 8.0 Hz, 1H), 7.77–7.38 (m, 4H), 7.31 (td, *J* = 8.0, 2.0 Hz, 1H), 7.20–7.00 (m, 2H), 6.25–6.10 (m, 1H), 5.92–5.74 (m, 1H), 5.32–4.87 (m, 3H), 4.15 (dd, *J* = 10.0, 6.0 Hz, 1H), 3.23 (dd, *J* = 11.0, 7.0 Hz, 1H), 2.82–2.52 (m, 2H), 1.67–1.45 (m, 9H), 1.16 (s, 9H). <sup>13</sup>C NMR (100 MHz, CDCl<sub>3</sub>) δ 174.9, 170.6, 155.4, 149.2, 140.6, 139.7, 129.7, 128.8, 128.5, 127.8, 125.4 (d, *J* = 12 Hz), 125.4 (d, *J* = 4 Hz), 124.6, 124.0, 123.8, 115.0, 83.7, 82.0, 65.8, 51.5, 51.0, 41.1, 28.1, 27.5, 25.4. ESI-HRMS: calcd for C<sub>32</sub>H<sub>35</sub>F<sub>3</sub>N<sub>2</sub>O<sub>7</sub>Na<sup>+</sup> [M+Na<sup>+</sup>] 639.2289, found 639.2290.

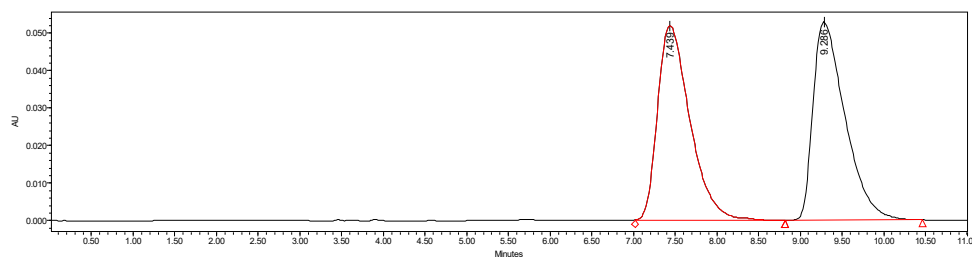

|   | Retention Time | Area    | % Area |
|---|----------------|---------|--------|
| 1 | 7.439          | 1409993 | 50.01  |
| 2 | 9.286          | 1409237 | 49.99  |

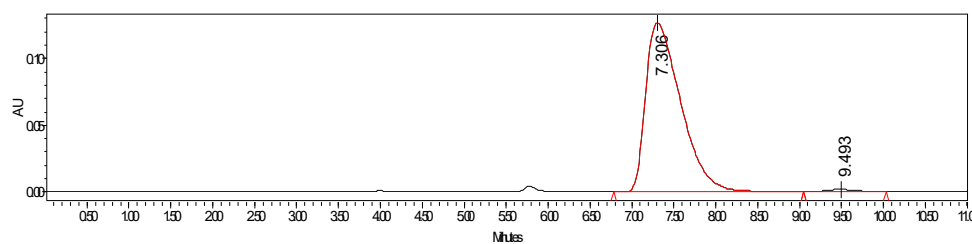

|   | Retention Time | Area    | % Area |
|---|----------------|---------|--------|
| 1 | 7.306          | 3681700 | 98.82  |
| 2 | 9.493          | 43899   | 1.18   |

di-tert-butyl (1R,2R,6R)-2-(((3-methoxybenzyl)oxy)carbonyl)amino)-2'-oxospiro[cyclohexane-1,3'-indolin]-3-ene-1',6-dicarboxylate (**3q**)

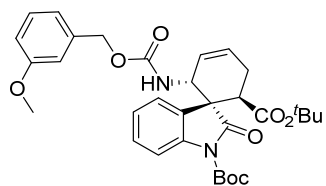

(C<sub>32</sub>H<sub>38</sub>N<sub>2</sub>O<sub>8</sub>) white amorphous solid; 89% yield, >95:5 dr, 99% ee.  $[\alpha]_D^{33} = -69.5$  (c = 0.92, in CH<sub>2</sub>Cl<sub>2</sub>), HPLC DAICEL CHIRALCEL IB, 2-propanol/*n*-hexane = 10/90, flow rate = 1.0 mL/min,  $\lambda = 254$  nm, retention time:  $t_{major} = 11.28$  min,  $t_{minor} =$

14.77 min. <sup>1</sup>H NMR (400 MHz, CDCl<sub>3</sub>)  $\delta$  7.92 (d,  $J = 8.0$  Hz, 1H), 7.33–7.24 (m, 2H), 7.15–7.03 (m, 2H), 7.00–6.65 (m, 3H), 6.21–6.04 (m, 1H), 5.90–5.72 (m, 1H), 5.28–4.76 (m, 3H), 4.15 (dd,  $J = 10.0, 5.0$  Hz, 1H), 3.81 (s, 3H), 3.22 (dd,  $J = 11.0, 7.0$  Hz, 1H), 2.81–2.54 (m, 2H), 1.67–1.49 (m, 9H), 1.15 (s, 9H). <sup>13</sup>C NMR (100 MHz, CDCl<sub>3</sub>)  $\delta$  174.7, 170.7, 159.7, 155.6, 149.3, 139.8, 137.9, 129.5, 128.9, 128.4, 124.7, 123.9, 123.7, 120.3, 115.0, 113.8, 113.3, 83.7, 81.9, 66.8, 55.3, 51.5, 51.1, 41.1, 28.1, 27.5, 25.4. ESI-HRMS: calcd for C<sub>32</sub>H<sub>38</sub>N<sub>2</sub>O<sub>8</sub>Na<sup>+</sup> [M+Na<sup>+</sup>] 601.2520, found 601.2527.

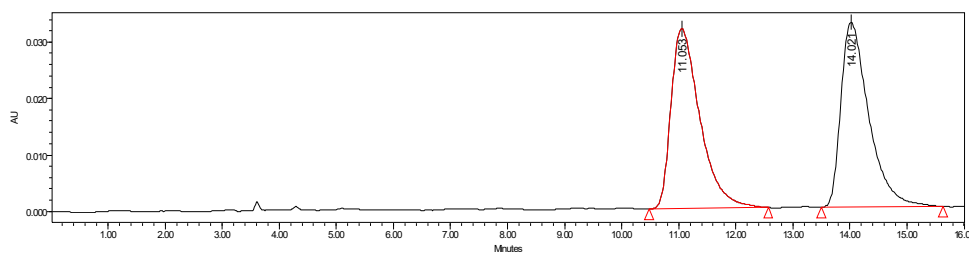

|   | Retention Time | Area    | % Area |
|---|----------------|---------|--------|
| 1 | 11.053         | 1124360 | 50.29  |
| 2 | 14.021         | 1111189 | 49.71  |

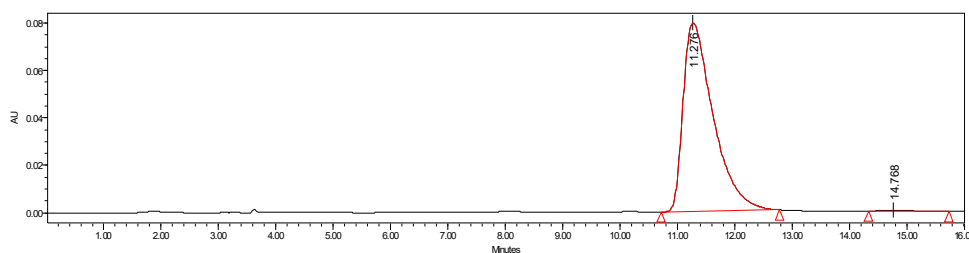

|   | Retention Time | Area    | % Area |
|---|----------------|---------|--------|
| 1 | 11.276         | 2903862 | 99.40  |
| 2 | 14.768         | 17491   | 0.60   |



di-tert-butyl (1R,2R,6R)-2-((tert-butoxycarbonyl)amino)-2'-oxospiro[cyclohexane-1,3'-indolin]-3-ene-1',6-dicarboxylate (**3r**)

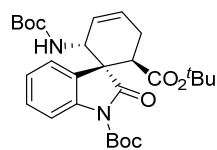

(C<sub>28</sub>H<sub>38</sub>N<sub>2</sub>O<sub>7</sub>) white amorphous solid; 99% yield, >95:5 dr, 99% ee. [ $\alpha$ ]<sub>D</sub><sup>21</sup> =

-52.5 (c = 1.03, in CH<sub>2</sub>Cl<sub>2</sub>), HPLC DAICEL CHIRALCEL IB, 2-propanol/*n*-

hexane = 10/90, flow rate = 1.0 mL/min,  $\lambda$  = 254 nm, retention time:  $t_{major}$  =

5.00 min,  $t_{minor}$  = 6.72 min. <sup>1</sup>H NMR (400 MHz, CDCl<sub>3</sub>)  $\delta$  7.95 (d,  $J$  = 8.0 Hz, 1H), 7.33–7.27 (m,

1H), 7.15–6.98 (m, 2H), 6.23–6.08 (m, 1H), 5.87–5.75 (m, 1H), 4.78 (d,  $J$  = 10.0 Hz, 1H), 4.05 (dd,

$J$  = 10.0, 5.0 Hz, 1H), 3.20 (dd,  $J$  = 11.0, 7.0 Hz, 1H), 2.77–2.52 (m, 2H), 1.61 (s, 9H), 1.47–1.36

(m, 9H), 1.13 (s, 9H). <sup>13</sup>C NMR (100 MHz, CDCl<sub>3</sub>)  $\delta$  174.5, 170.8, 154.9, 149.5, 139.8, 129.3, 129.2,

128.2, 124.9, 123.8, 123.5, 115.2, 83.5, 81.8, 79.8, 51.3, 51.2, 41.2, 28.4, 28.1, 27.4, 25.5. ESI-

HRMS: calcd for C<sub>28</sub>H<sub>38</sub>N<sub>2</sub>O<sub>7</sub>Na<sup>+</sup> [M+Na<sup>+</sup>] 537.2571, found 537.2574.

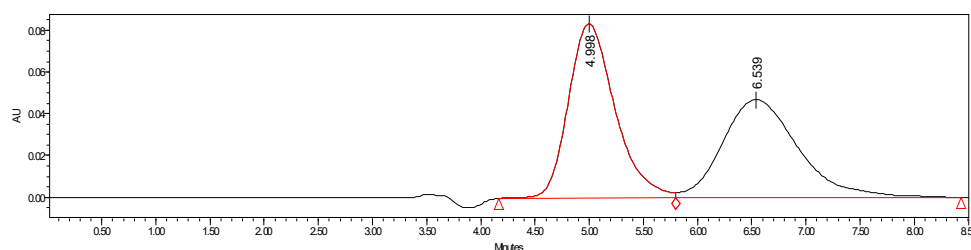

|   | Retention Time | Area    | % Area |
|---|----------------|---------|--------|
| 1 | 4.998          | 2505034 | 52.33  |
| 2 | 6.539          | 2281789 | 47.67  |

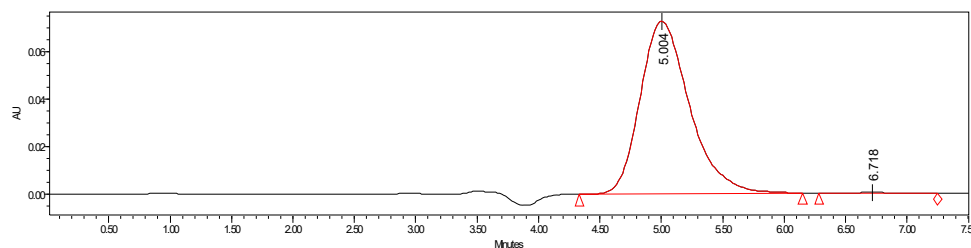

|   | Retention Time | Area    | % Area |
|---|----------------|---------|--------|
| 1 | 5.004          | 2037184 | 99.69  |
| 2 | 6.718          | 6361    | 0.31   |

di-tert-butyl (1R,2R,6R)-2-(((9H-fluoren-9-yl)methoxy)carbonyl)amino)-2'-oxospiro  
[cyclohexane-1,3'-indolin]-3-ene-1',6-dicarboxylate (**3s**)

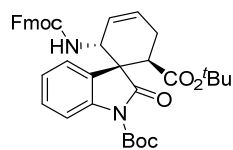

(C<sub>38</sub>H<sub>40</sub>N<sub>2</sub>O<sub>7</sub>) white amorphous solid; 95% yield, >95:5 dr, 99% ee. [α]<sub>D</sub><sup>33</sup> =  
−63.2 (c = 1.03, in CH<sub>2</sub>Cl<sub>2</sub>), HPLC DAICEL CHIRALCEL IB, 2-propanol/*n*-  
hexane = 10/90, flow rate = 1.0 mL/min, λ = 254 nm, retention time: *t*<sub>major</sub> =

11.39 min, *t*<sub>minor</sub> = 19.21 min. <sup>1</sup>H NMR (400 MHz, CDCl<sub>3</sub>) δ 7.93 (d, *J* = 8.0 Hz, 1H), 7.86–7.42 (m, 4H), 7.41–7.26 (m, 5H), 7.17–7.04 (m, 2H), 6.29–6.02 (m, 1H), 5.96–5.60 (m, 1H), 5.20 (d, *J* = 10.0 Hz, 1H), 4.58–4.04 (m, 4H), 3.27 (dd, *J* = 11.0, 7.0 Hz, 1H), 2.91–2.42 (m, 2H), 1.64–1.34 (m, 9H), 1.15 (s, 9H). <sup>13</sup>C NMR (100 MHz, CDCl<sub>3</sub>) δ 174.8, 170.7, 155.6, 149.4, 144.5, 143.6, 141.3, 141.1, 139.8, 129.5, 129.0, 128.5, 127.6, 127.6, 127.1, 127.0, 125.6, 125.1, 124.8, 124.0, 123.7, 119.9, 119.9, 115.1, 83.7, 82.0, 67.3, 51.5, 51.1, 47.2, 41.2, 28.1, 27.5, 25.5. ESI-HRMS: calcd for C<sub>38</sub>H<sub>40</sub>N<sub>2</sub>O<sub>7</sub>Na<sup>+</sup> [M+Na<sup>+</sup>] 659.2728, found 659.2737.

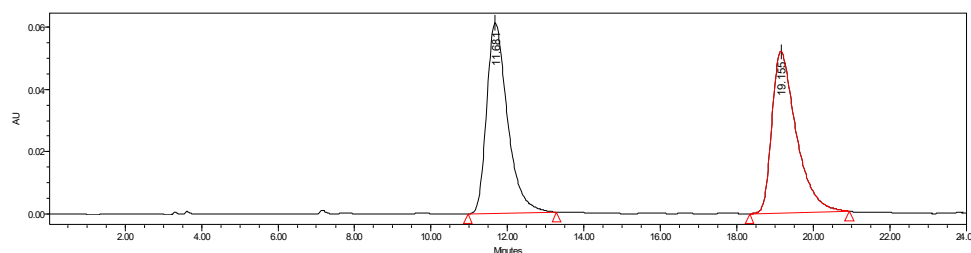

|   | Retention Time | Area    | % Area |
|---|----------------|---------|--------|
| 1 | 11.681         | 2307605 | 50.24  |
| 2 | 19.155         | 2285509 | 49.76  |

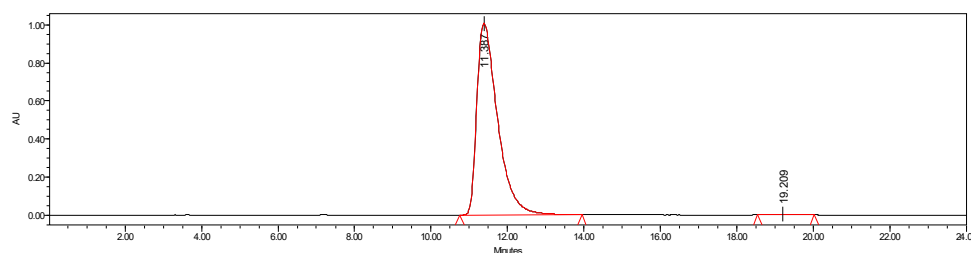

|   | Retention Time | Area     | % Area |
|---|----------------|----------|--------|
| 1 | 11.387         | 37893079 | 99.63  |
| 2 | 19.209         | 141882   | 0.37   |

di-tert-butyl (1R,2R,5S,6R)-2-(((benzyloxy)carbonyl)amino)-5-methyl-2'-oxospiro[cyclohexane-1,3'-indolin]-3-ene-1',6-dicarboxylate (**3t**)

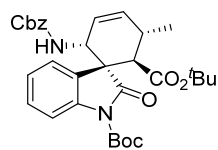

(C<sub>32</sub>H<sub>38</sub>N<sub>2</sub>O<sub>7</sub>) white amorphous solid; 94% yield, >95:5 dr, 99% ee. [ $\alpha$ ]<sub>D</sub><sup>33</sup> =

-22.9 (c = 0.85, in CH<sub>2</sub>Cl<sub>2</sub>), HPLC DAICEL CHIRALCEL IA, 2-propanol/*n*-

hexane = 30/70, flow rate = 1.0 mL/min,  $\lambda$  = 254 nm, retention time:  $t_{minor}$  =

4.37 min,  $t_{major}$  = 6.62 min. <sup>1</sup>H NMR (400 MHz, CDCl<sub>3</sub>)  $\delta$  7.89 (d,  $J$  = 8.0 Hz, 1H), 7.45–7.26 (m,

6H), 7.18 (dd,  $J$  = 8.0, 2.0 Hz, 1H), 7.06 (td,  $J$  = 8.0, 1.0 Hz, 1H), 6.06–5.90 (m, 1H), 5.87–5.70 (m,

1H), 5.29–4.84 (m, 3H), 4.08 (dd,  $J$  = 9.0, 6.0 Hz, 1H), 3.12–2.64 (m, 2H), 1.65–1.47 (m, 9H), 1.25–

1.18 (m, 3H), 1.13 (s, 9H). <sup>13</sup>C NMR (100 MHz, CDCl<sub>3</sub>)  $\delta$  174.1, 170.0, 155.6, 149.2, 139.5, 136.4,

136.2, 128.8, 128.5, 128.5, 128.2, 128.0, 124.1, 124.0, 123.1, 114.9, 83.8, 81.6, 67.0, 52.0, 51.1,

48.8, 30.2, 28.1, 27.4, 20.8. ESI-HRMS: calcd for C<sub>32</sub>H<sub>38</sub>N<sub>2</sub>O<sub>7</sub>Na<sup>+</sup> [M+Na<sup>+</sup>] 585.2571, found

585.2571.

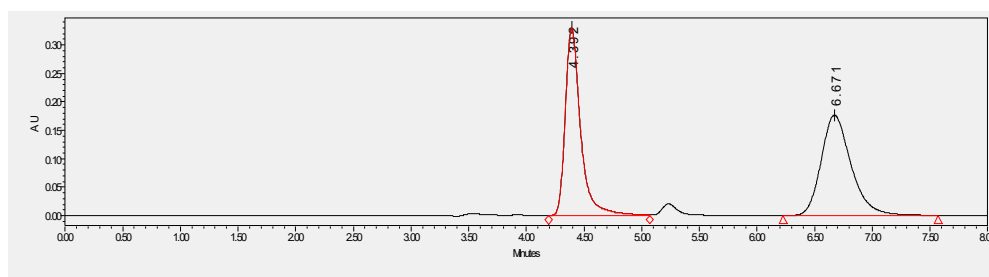

|   | Retention Time | Area    | % Area |
|---|----------------|---------|--------|
| 1 | 4.392          | 3073772 | 49.05  |
| 2 | 6.671          | 3192975 | 50.95  |

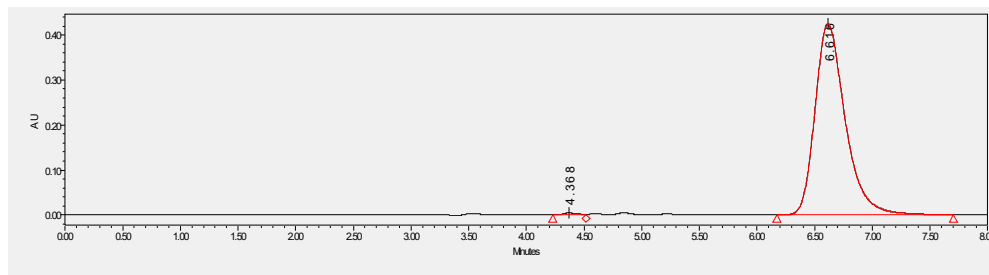

|   | Retention Time | Area    | % Area |
|---|----------------|---------|--------|
| 1 | 4.368          | 33064   | 0.43   |
| 2 | 6.616          | 7711224 | 99.57  |

1'-benzyl 6-(tert-butyl) (1R,2R,6R)-2-(((benzyloxy)carbonyl)amino)-2'-oxospiro[cyclohexane-1,3'-indolin]-3-ene-1',6-dicarboxylate (**3u**)

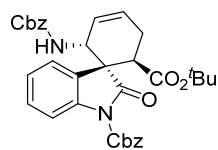

(C<sub>34</sub>H<sub>34</sub>N<sub>2</sub>O<sub>7</sub>) white amorphous solid; 97% yield, >95:5 dr, 92% ee. [ $\alpha$ ]<sub>D</sub><sup>18</sup> =

-66.7 (c = 1.13, in CH<sub>2</sub>Cl<sub>2</sub>), HPLC DAICEL CHIRALCEL IB, 2-propanol/*n*-

hexane = 10/90, flow rate = 1.0 mL/min,  $\lambda$  = 254 nm, retention time:  $t_{major}$  =

11.44 min,  $t_{minor}$  = 15.35 min. <sup>1</sup>H NMR (400 MHz, CDCl<sub>3</sub>)  $\delta$  8.03 (d,  $J$  = 8.0 Hz, 1H), 7.60–7.47 (m,

2H), 7.41–7.24 (m, 9H), 7.14–7.05 (m, 2H), 6.21–6.11 (m, 1H), 5.85–5.76 (m, 1H), 5.45 (s, 2H),

5.13–4.76 (m, 3H), 4.20–4.10 (m, 1H), 3.26 (dd,  $J$  = 11.0, 7.0 Hz, 1H), 2.84–2.56 (m, 2H), 1.10 (s,

9H). <sup>13</sup>C NMR (100 MHz, CDCl<sub>3</sub>)  $\delta$  174.7, 170.6, 155.7, 151.0, 139.4, 136.4, 135.4, 129.8, 129.1,

128.6, 128.5, 128.4, 128.1, 128.1, 128.0, 127.8, 124.5, 124.3, 123.7, 115.2, 82.0, 68.2, 67.0, 51.7,

51.3, 41.1, 27.5, 25.5. ESI-HRMS: calcd for C<sub>34</sub>H<sub>34</sub>N<sub>2</sub>O<sub>7</sub>Na<sup>+</sup> [M+Na<sup>+</sup>] 605.2258, found 605.2266.

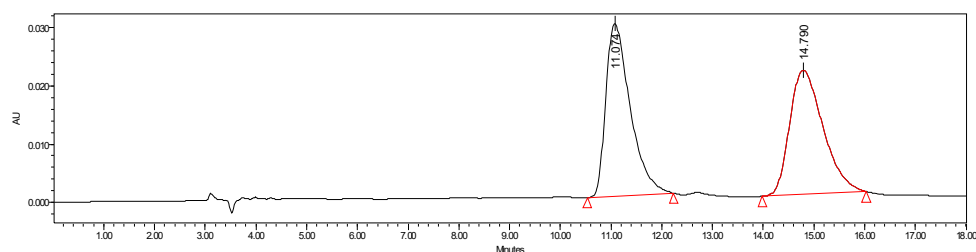

|   | Retention Time | Area   | % Area |
|---|----------------|--------|--------|
| 1 | 11.074         | 990574 | 50.42  |
| 2 | 14.790         | 973973 | 49.58  |

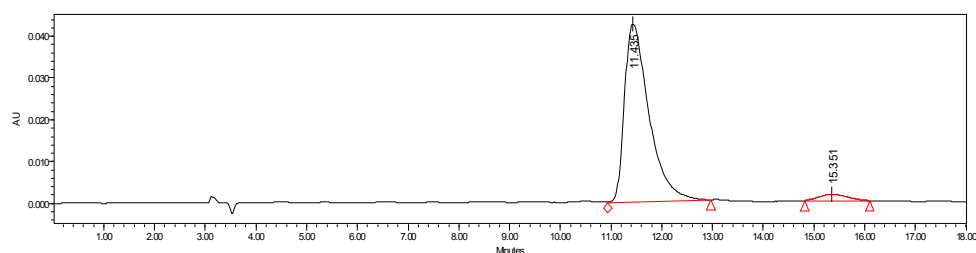

|   | Retention Time | Area    | % Area |
|---|----------------|---------|--------|
| 1 | 11.435         | 1430197 | 96.17  |
| 2 | 15.351         | 56931   | 3.83   |

1',3-di-tert-butyl 6-methyl (1S,2R,3R,4R)-2'-oxo-6-azaspiro[bicyclo[2.2.2]octane-2,3'-indolin]-7-ene-1',3,6-tricarboxylate (**5a**)

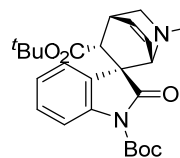

( $C_{26}H_{32}N_2O_7$ ) white amorphous solid; 87% yield, >95:5 dr, 99% ee.  $[\alpha]_D^{34}$  = 26.8 (c = 0.70, in  $CH_2Cl_2$ ), HPLC DAICEL CHIRALCEL IB, 2-propanol/*n*-hexane = 10/90, flow rate = 1.0 mL/min,  $\lambda$  = 254 nm, retention time:  $t_{minor}$  = 5.54 min,  $t_{major}$  = 5.97 min.  $^1H$  NMR (400 MHz,  $CDCl_3$ ) mixture of rotamers  $\delta$  7.89 (dd,  $J$  = 11.0, 8.0 Hz, 1H), 7.36–7.30 (m, 1H), 7.16–7.08 (m, 1H), 6.95 (t,  $J$  = 8.0 Hz, 1H), 6.76–6.66 (m, 1H), 6.58–6.48 (m, 1H), 4.58+4.40 (dd,  $J$  = 6.0, 1.0 Hz, 1H), 4.06–3.95 (m, 1H), 3.64+3.39 (s, 3H), 3.33–3.24 (m, 1H), 3.21–3.12 (m, 1H), 2.99–2.90 (m, 1H), 1.64 (s, 9H), 0.91+0.90 (s, 9H).  $^{13}C$  NMR (100 MHz,  $CDCl_3$ ) mixture of rotamers  $\delta$  175.3+175.1, 169.6+169.3, 155.9+155.3, 149.1+149.0, 139.9+139.7, 135.2+134.7, 131.5+130.8, 128.8+128.7, 127.4+127.1, 124.8+124.4, 124.4+124.3, 114.9+114.7, 84.6+84.5, 81.2, 54.6+54.3, 52.7+52.4, 52.3+51.9, 48.2+48.1, 42.3+42.1, 32.3+32.0, 28.1, 27.3. ESI-HRMS: calcd for  $C_{26}H_{32}N_2O_7Na^+$   $[M+Na^+]$  507.2102, found 507.2110.

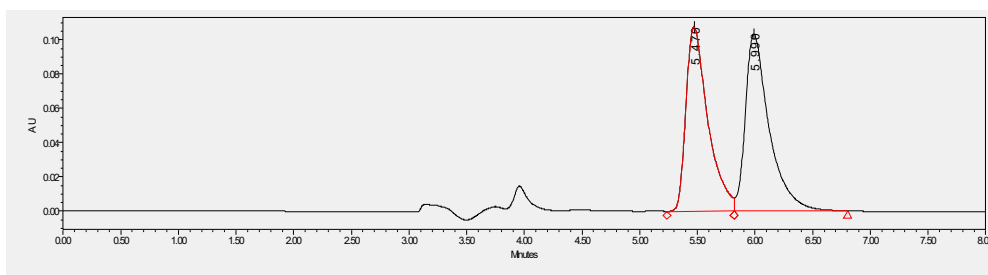

|   | Retention Time | Area    | % Area |
|---|----------------|---------|--------|
| 1 | 5.470          | 1427239 | 48.87  |
| 2 | 5.990          | 1493246 | 51.13  |

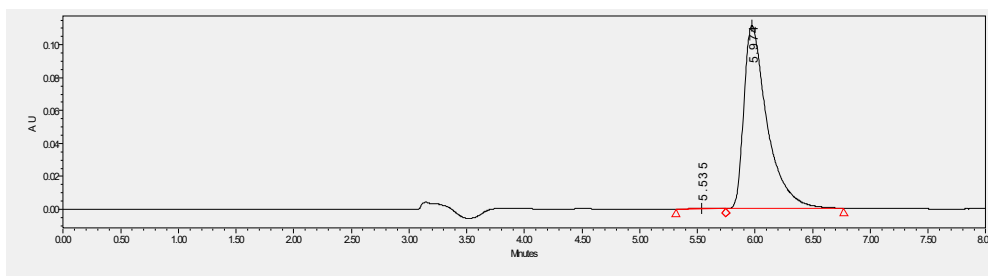

|   | Retention Time | Area    | % Area |
|---|----------------|---------|--------|
| 1 | 5.535          | 4459    | 0.28   |
| 2 | 5.974          | 1565621 | 99.72  |

1',3-di-tert-butyl 6-isopropyl (1S,2R,3R,4R)-2'-oxo-6-azaspiro[bicyclo[2.2.2]octane-2,3'-indolin]-7-ene-1',3,6-tricarboxylate (**5b**)

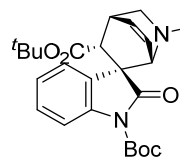

( $C_{28}H_{36}N_2O_7$ ) white amorphous solid; 96% yield, >95:5 dr, 99% ee.  $[\alpha]_D^{25}$   
 = 24.3 (c = 0.83, in  $CH_2Cl_2$ ), HPLC DAICEL CHIRALCEL AD-H, 2-  
 propanol/*n*-hexane = 20/80, flow rate = 1.0 mL/min,  $\lambda$  = 254 nm, retention

time:  $t_{minor}$  = 5.61 min,  $t_{major}$  = 6.96 min.  $^1H$  NMR (400 MHz,  $CDCl_3$ ) mixture of rotamers  $\delta$  7.96–7.80 (m, 1H), 7.32 (tt,  $J$  = 8.0, 1.0 Hz, 1H), 7.14–7.03 (m, 1H), 6.99–6.89 (m, 1H), 6.76–6.65 (m, 1H), 6.59–6.47 (m, 1H), 4.85–4.66 (m, 1H), 4.58+4.41 (dd,  $J$  = 6.0, 1.0 Hz, 1H), 3.99 (td,  $J$  = 11.0, 2.0 Hz, 1H), 3.19–3.09 (m, 1H), 2.95 (dt,  $J$  = 6.0, 2.0 Hz, 1H), 1.64+1.63 (s, 9H), 1.22 (dd,  $J$  = 11.0, 6.0 Hz, 3H), 1.06–0.69 (m, 12H).  $^{13}C$  NMR (100 MHz,  $CDCl_3$ ) mixture of rotamers  $\delta$  175.3+175.2, 169.8+169.3, 154.9+154.4, 149.2+149.0, 139.9+139.6, 135.2+134.7, 131.6+130.8, 128.8+128.5, 127.6+127.2, 124.9+124.5, 124.5+124.3, 114.9+114.6, 84.6+84.5, 81.2+81.2, 68.5+68.5, 54.7+54.5, 52.3+51.6, 48.3+48.3, 42.1+42.1, 32.3+32.1, 28.1, 27.3, 22.4+22.1, 22.0+21.8. ESI-HRMS: calcd for  $C_{28}H_{36}N_2O_7Na^+$  [ $M+Na^+$ ] 535.2415, found 535.2421.

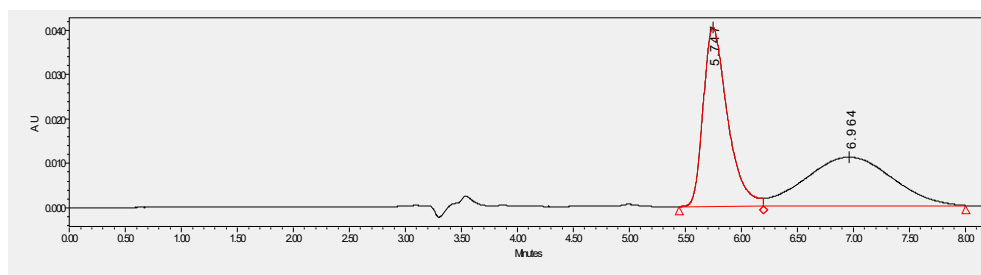

|   | Retention Time | Area   | % Area |
|---|----------------|--------|--------|
| 1 | 5.747          | 610339 | 50.80  |
| 2 | 6.964          | 591210 | 49.20  |

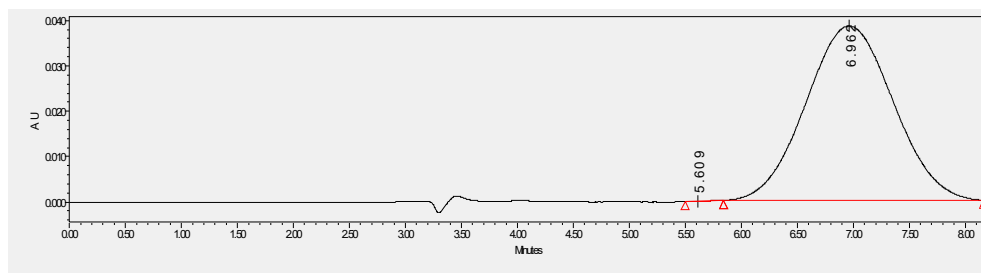

|   | Retention Time | Area    | % Area |
|---|----------------|---------|--------|
| 1 | 5.609          | 668     | 0.03   |
| 2 | 6.962          | 2086436 | 99.97  |

1',3-di-tert-butyl 6-isobutyl (1S,2R,3R,4R)-2'-oxo-6-azaspiro[bicyclo[2.2.2]octane-2,3'-indolin]-7-ene-1',3,6-tricarboxylate (**5c**)

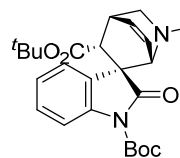

( $C_{29}H_{38}N_2O_7$ ) white amorphous solid; 96% yield, >95:5 dr, 99% ee.  $[\alpha]_D^{34} = 34.1$  ( $c = 0.92$ , in  $CH_2Cl_2$ ), HPLC DAICEL CHIRALCEL IB, 2-propanol/*n*-hexane = 10/90, flow rate = 1.0 mL/min,  $\lambda = 254$  nm, retention time:  $t_{minor} = 4.76$  min,  $t_{major} = 5.13$  min.  $^1H$  NMR (400 MHz,  $CDCl_3$ ) mixture of rotamers  $\delta$  7.97–7.80 (m, 1H), 7.32 (tt,  $J = 8.0, 2.0$  Hz, 1H), 7.14–7.05 (m, 1H), 6.99–6.93 (m, 1H), 6.76–6.67 (m, 1H), 6.59–6.50 (m, 1H), 4.58+4.44 (dd,  $J = 6.0, 1.0$  Hz, 1H), 4.07–3.95 (m, 1H), 3.87+3.71 (dd,  $J = 10.0, 6.0$  Hz, 1H), 3.63+3.54 (dd,  $J = 10.0, 7.0$  Hz, 1H), 3.34–3.25 (m, 1H), 3.21–3.13 (m, 1H), 2.99–2.92 (m, 1H), 1.91–1.62 (m, 10H), 0.97–0.89 (m, 12H), 0.56+0.54 (d,  $J = 6.0$  Hz, 3H).  $^{13}C$  NMR (100 MHz,  $CDCl_3$ ) mixture of rotamers  $\delta$  175.3+175.3, 169.7+169.3, 155.5+154.9, 149.1+149.0, 139.9+139.7, 135.2+134.7, 131.6+130.8, 128.8+128.7, 127.5+127.2, 124.9+124.3, 124.5, 114.9+114.7, 100.0, 84.6+84.5, 81.2+81.2, 71.5+71.4, 54.6+54.4, 52.4+51.7, 48.3+48.2, 42.2+42.1, 32.3+32.1, 28.1, 28.0+27.6, 27.3+27.3, 19.1+19.0, 18.7+18.7. ESI-HRMS: calcd for  $C_{29}H_{38}N_2O_7Na^+$   $[M+Na^+]$  549.2571, found 549.2573.

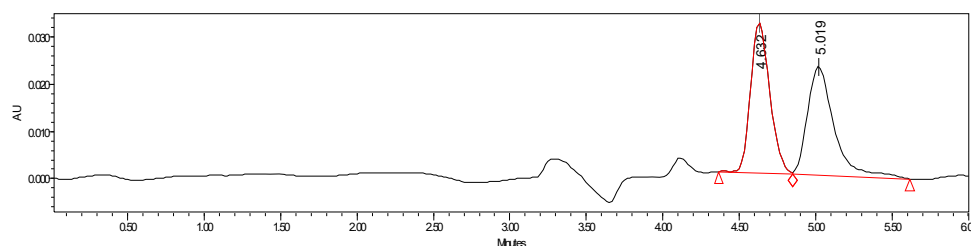

|   | Retention Time | Area   | % Area |
|---|----------------|--------|--------|
| 1 | 4.632          | 278094 | 49.83  |
| 2 | 5.019          | 279955 | 50.17  |

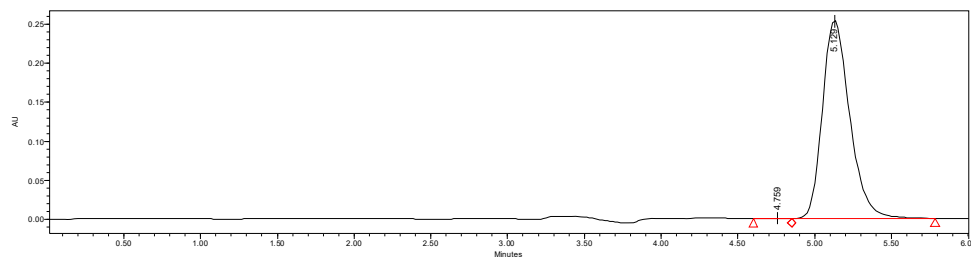

|   | Retention Time | Area    | % Area |
|---|----------------|---------|--------|
| 1 | 4.759          | 4190    | 0.13   |
| 2 | 5.129          | 3126767 | 99.87  |

6-benzyl 1',3-di-tert-butyl (1S,2R,3R,4R)-2'-oxo-6-azaspiro[bicyclo[2.2.2]octane-2,3'-indolin]-7-ene-1',3,6-tricarboxylate (**5d**)

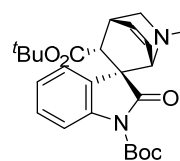

(C<sub>32</sub>H<sub>36</sub>N<sub>2</sub>O<sub>7</sub>) white amorphous solid; 91% yield, >95:5 dr, 99% ee. [ $\alpha$ ]<sub>D</sub><sup>34</sup> = 49.8 (c = 0.95, in CH<sub>2</sub>Cl<sub>2</sub>), HPLC DAICEL CHIRALCEL IA, 2-propanol/*n*-hexane = 30/70, flow rate = 1.0 mL/min,  $\lambda$  = 254 nm, retention time:  $t_{minor}$  = 7.03 min,  $t_{major}$  = 7.88 min. <sup>1</sup>H NMR (400 MHz, CDCl<sub>3</sub>) mixture of rotamers  $\delta$  7.93+7.86 (d,  $J$  = 8.0 Hz, 1H), 7.38–7.20 (m, 5H), 7.11–6.96 (m, 1H), 6.92–6.79 (m, 2H), 6.76–6.67 (m, 1H), 6.60–6.46 (m, 1H), 5.16+4.96 (d,  $J$  = 12.0 Hz, 1H), 4.90+4.80 (d,  $J$  = 12.0 Hz, 1H), 4.59+4.48 (dd,  $J$  = 6.0, 1.0 Hz, 1H), 4.09–3.98 (m, 1H), 3.35–3.25 (m, 1H), 3.24–3.14 (m, 1H), 2.97+2.94 (t,  $J$  = 2.0 Hz, 1H), 1.63 (s, 9H), 0.92+0.88 (s, 9H). <sup>13</sup>C NMR (100 MHz, CDCl<sub>3</sub>) mixture of rotamers  $\delta$  175.3+175.1, 169.6+169.3, 155.2+154.6, 149.1+149.0, 139.9+139.7, 136.7+136.2, 135.3+134.8, 131.5+130.8, 128.7+128.7, 128.5+128.3, 128.1+127.6, 128.1+127.8, 127.5+127.0, 124.8+124.5, 124.4+124.4, 114.9+114.7, 84.6+84.6, 81.3+81.3, 67.0+66.8, 54.6+54.3, 52.5+51.9, 48.2+48.1, 42.4+42.2, 32.3+32.0, 28.1, 27.3+27.3. ESI-HRMS: calcd for C<sub>32</sub>H<sub>36</sub>N<sub>2</sub>O<sub>7</sub>Na<sup>+</sup> [M+Na<sup>+</sup>] 583.2415, found 583.2425.

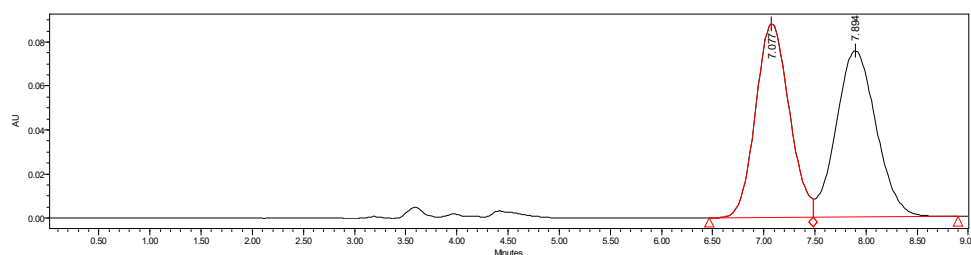

|   | Retention Time | Area    | % Area |
|---|----------------|---------|--------|
| 1 | 7.077          | 2012984 | 49.51  |
| 2 | 7.894          | 2052935 | 50.49  |

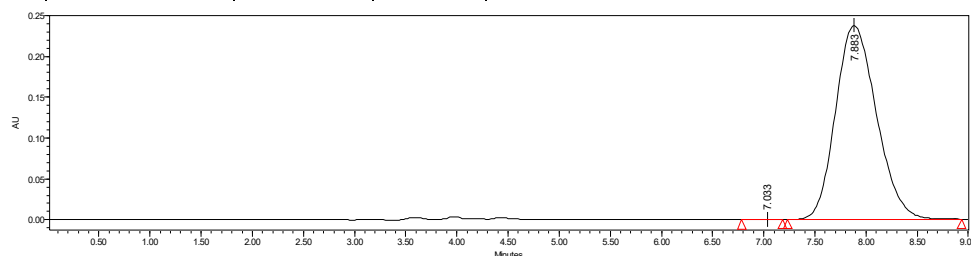

|   | Retention Time | Area    | % Area |
|---|----------------|---------|--------|
| 1 | 7.033          | 576     | 0.01   |
| 2 | 7.883          | 6581197 | 99.99  |



1',3-di-tert-butyl 6-phenyl (1S,2R,3R,4R)-2'-oxo-6-azaspiro[bicyclo[2.2.2]octane-2,3'-indolin]-7-ene-1',3,6-tricarboxylate (**5e**)

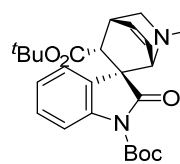

( $C_{31}H_{34}N_2O_7$ ) white amorphous solid; 99% yield, >95:5 dr, 99% ee.  $[\alpha]_D^{33}$   
 = 128.2 ( $c = 0.56$ , in  $CH_2Cl_2$ ), HPLC DAICEL CHIRALCEL IA, 2-propanol/*n*-hexane = 30/70, flow rate = 1.0 mL/min,  $\lambda = 254$  nm, retention time:  $t_{minor} = 7.72$  min,  $t_{major} = 8.82$  min.  $^1H$  NMR (400 MHz,  $CDCl_3$ ) mixture of rotamers  $\delta$  7.90+7.96 (d,  $J = 8.0$  Hz, 1H), 7.46–7.29 (m, 2H), 7.25–7.04 (m, 5H), 6.83–6.74 (m, 1H), 6.66–6.58 (m, 2H), 4.75–4.59 (m, 1H), 4.08+4.26 (dd,  $J = 11.0, 2.0$  Hz, 1H), 3.42–3.23 (m, 2H), 3.03+3.01 (t,  $J = 2.0$  Hz, 1H), 1.64 (s, 9H), 0.94+0.93 (s, 9H).  $^{13}C$  NMR (100 MHz,  $CDCl_3$ ) mixture of rotamers  $\delta$  175.1+175.0, 169.6+169.3, 153.6+152.9, 151.1+150.6, 149.1+149.0, 140.0+139.9, 135.6+135.0, 131.4+130.6, 129.2+129.1, 128.9, 127.5+127.0, 125.4+125.3, 124.9+124.6, 124.4, 121.7+121.5, 115.1+115.0, 84.7+84.7, 81.4, 54.7+54.2, 53.0+52.1, 48.1+48.0, 42.7+42.6, 32.3+32.0, 28.1, 27.3. ESI-HRMS: calcd for  $C_{31}H_{34}N_2O_7Na^+$   $[M+Na^+]$  569.2258, found 569.2264.

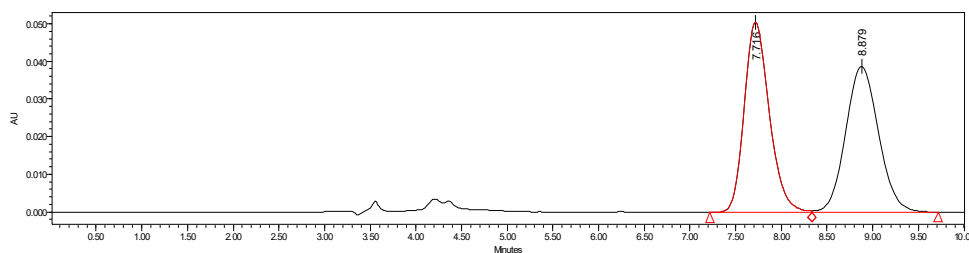

|   | Retention Time | Area   | % Area |
|---|----------------|--------|--------|
| 1 | 7.716          | 959997 | 49.87  |
| 2 | 8.879          | 965055 | 50.13  |

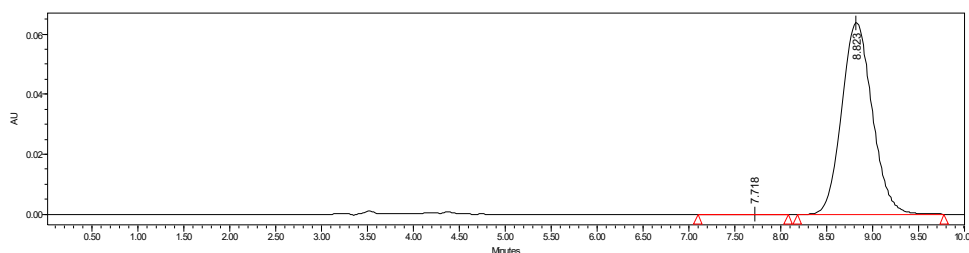

|   | Retention Time | Area    | % Area |
|---|----------------|---------|--------|
| 1 | 7.718          | 1556    | 0.10   |
| 2 | 8.823          | 1487993 | 99.90  |

1',3-di-tert-butyl 6-(4-chlorophenyl) (1S,2R,3R,4R)-5'-methyl-2'-oxo-6-azaspiro[bicyclo[2.2.2]octane-2,3'-indolin]-7-ene-1',3,6-tricarboxylate (**5f**)

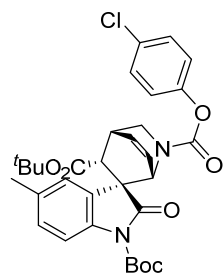

( $C_{32}H_{35}ClN_2O_7$ ) white powder, mp 154.0–156.0 °C; 91% yield, >95:5 dr, 99% ee.  $[\alpha]_D^{22} = 98.9$  ( $c = 1.41$ , in  $CH_2Cl_2$ ), HPLC DAICEL CHIRALCEL IA, 2-propanol/*n*-hexane = 30/70, flow rate = 1.0 mL/min,  $\lambda = 254$  nm, retention time:  $t_{minor} = 8.38$  min,  $t_{major} = 17.39$  min.  $^1H$  NMR (400 MHz,  $CDCl_3$ ) mixture of rotamers  $\delta$  7.84+7.78 (d,  $J = 8.0$  Hz, 1H), 7.31–7.27 (m, 1H), 7.22–7.12 (m, 2H), 7.06–6.93 (m, 1H), 6.87–6.73 (m, 2H), 6.61–6.50 (m, 2H), 4.69–4.53 (m, 1H), 4.26+4.09 (dd,  $J = 12.0, 2.0$  Hz, 1H), 3.40–3.20 (m, 2H), 3.02+2.99 (t,  $J = 2.0$  Hz, 1H), 2.31+2.28 (s, 3H), 1.64+1.63 (s, 9H), 0.94+0.93 (s, 9H).  $^{13}C$  NMR (100 MHz,  $CDCl_3$ ) mixture of rotamers  $\delta$  175.2+175.0, 169.6+169.3, 153.1+152.6, 151.1+150.6, 149.6+149.1+149.1+149.0 (2C), 137.6+137.4, 135.6+135.0, 134.1+133.7, 131.3+130.7+130.5+130.4 (2C), 129.4+129.1, 129.2+129.1, 127.5+127.0, 125.4+124.8, 123.0+122.7, 115.0+114.9, 84.6+84.5, 81.4, 54.9+54.2, 53.1+52.2, 47.9+47.8, 42.7, 32.3+31.9, 28.1, 27.3+27.2. ESI-HRMS: calcd for  $C_{32}H_{35}^{34,9689}ClN_2O_7Na^+$   $[M+Na^+]$  617.2025, found 617.2018; ESI-HRMS: calcd for  $C_{32}H_{35}^{36,9659}ClN_2O_7Na^+$   $[M+Na^+]$  619.1996, found 619.2021.

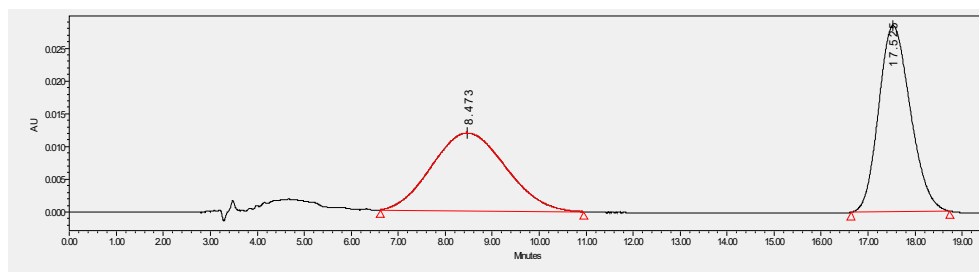

|   | Retention Time | Area    | % Area |
|---|----------------|---------|--------|
| 1 | 8.473          | 1299637 | 49.36  |
| 2 | 17.525         | 1333212 | 50.64  |

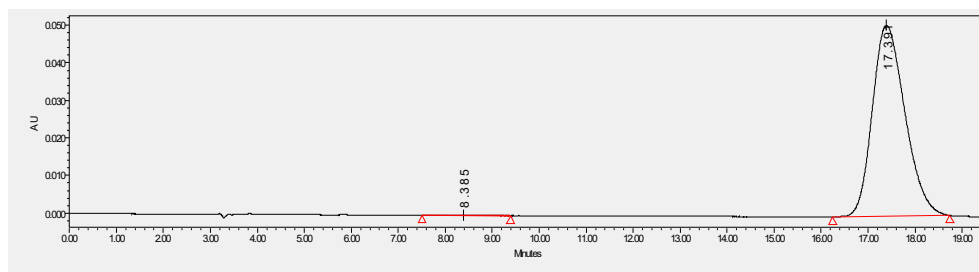

|   | Retention Time | Area    | % Area |
|---|----------------|---------|--------|
| 1 | 8.385          | 1753    | 0.07   |
| 2 | 17.391         | 2450985 | 99.93  |

1',3-di-tert-butyl 6-phenyl (1S,2R,3R,4R)-1-methyl-2'-oxo-6-azaspiro[bicyclo[2.2.2]octane-2,3'-indolin]-7-ene-1',3,6-tricarboxylate (**5g**)

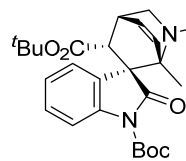

( $C_{32}H_{36}N_2O_7$ ) white amorphous solid; 95% yield, >95:5 dr, 99% ee.  $[\alpha]_D^{34}$   
 = 80.2 ( $c = 0.70$ , in  $CH_2Cl_2$ ), HPLC DAICEL CHIRALCEL IA, 2-  
 propanol/*n*-hexane = 30/70, flow rate = 1.0 mL/min,  $\lambda = 254$  nm, retention

time:  $t_{major} = 5.06$  min,  $t_{minor} = 6.05$  min.  $^1H$  NMR (400 MHz,  $CDCl_3$ )  $\delta$  7.90 (d,  $J = 8.0$  Hz, 1H),  
 7.43–7.28 (m, 3H), 7.26–7.13 (m, 3H), 7.11–6.80 (m, 2H), 6.75 (t,  $J = 8.0$  Hz, 1H), 6.30 (dd,  $J =$   
 8.0, 1.0 Hz, 1H), 4.27 (d,  $J = 12.0$  Hz, 1H), 3.44 (d,  $J = 12.0$  Hz, 1H), 3.29–3.19 (m, 1H), 3.09 (t,  $J =$   
 2.0 Hz, 1H), 1.63 (s, 9H), 1.50 (s, 3H), 0.91 (s, 9H).  $^{13}C$  NMR (100 MHz,  $CDCl_3$ )  $\delta$  175.8, 169.6,  
 150.9, 148.9, 141.3, 137.1, 134.2, 129.2, 129.1, 126.5, 125.2, 124.9, 124.7, 121.8, 114.6, 84.6, 81.2,  
 60.9, 59.3, 50.5, 45.9, 31.4, 28.1, 27.2, 19.5. ESI-HRMS: calcd for  $C_{32}H_{36}N_2O_7Na^+$   $[M+Na^+]$   
 583.2415, found 583.2420.

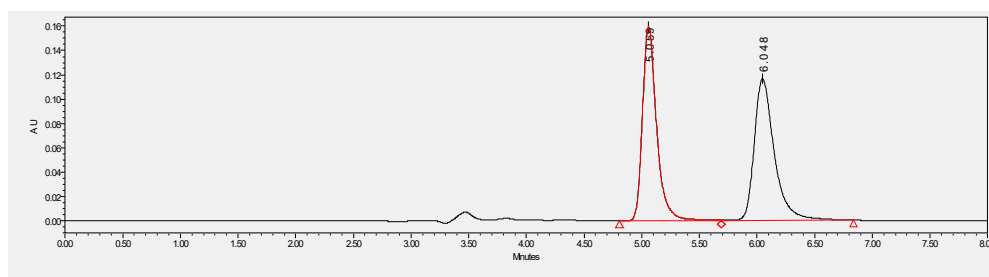

|   | Retention Time | Area    | % Area |
|---|----------------|---------|--------|
| 1 | 5.059          | 1349237 | 49.01  |
| 2 | 6.048          | 1403579 | 50.99  |

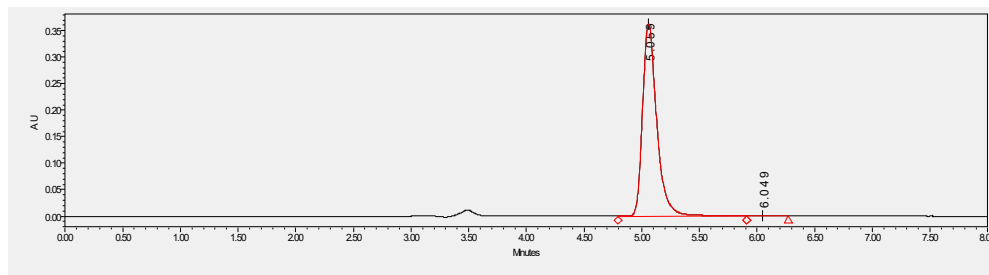

|   | Retention Time | Area    | % Area |
|---|----------------|---------|--------|
| 1 | 5.059          | 3140488 | 99.66  |
| 2 | 6.049          | 10701   | 0.34   |

1',3-di-tert-butyl 6-phenyl (1S,2R,3R,4S)-8-methyl-2'-oxo-6-azaspiro[bicyclo[2.2.2]octane-2,3'-indolin]-7-ene-1',3,6-tricarboxylate (**5h**)

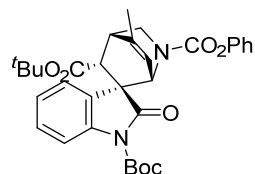

( $C_{32}H_{36}N_2O_7$ ) white amorphous solid; 99% yield, >95:5 dr, 99% ee.  $[\alpha]_D^{34}$   
 = 75.5 ( $c = 1.02$ , in  $CH_2Cl_2$ ), HPLC DAICEL CHIRALCEL IA, 2-  
 propanol/*n*-hexane = 30/70, flow rate = 1.0 mL/min,  $\lambda = 254$  nm, retention

time:  $t_{minor} = 5.61$  min,  $t_{major} = 9.95$  min.  $^1H$  NMR (400 MHz,  $CDCl_3$ ) mixture of rotamers  $\delta$   
 7.89+7.95 (d,  $J = 8.0$  Hz, 1H), 7.48–7.29 (m, 2H), 7.25–7.03 (m, 5H), 6.64–6.61 (m, 1H), 6.23–6.12  
 (m, 1H), 4.57+4.54 (d,  $J = 6.0$  Hz, 1H), 4.21+4.03 (dd,  $J = 11.0, 2.0$  Hz, 1H), 3.45–3.24 (m, 1H),  
 3.15–3.08 (m, 1H), 3.01+2.98 (t,  $J = 2.0$  Hz, 1H), 2.06 (t,  $J = 2.0$  Hz, 3H), 1.64 (s, 9H), 0.94+0.93  
 (s, 9H).  $^{13}C$  NMR (100 MHz,  $CDCl_3$ ) mixture of rotamers  $\delta$  175.0+174.9, 169.8+169.5,  
 153.4+152.8, 151.1+150.6, 149.1+149.0, 145.2+144.6, 140.0+139.8, 129.2+129.0, 129.0+128.8,  
 127.9+127.4, 125.3+125.2, 124.9+124.5, 124.4+124.3, 124.0+123.3, 121.7+121.5, 115.0+114.9,  
 84.6+84.6, 81.4, 55.5+55.0, 54.0+53.1, 47.9+47.8, 42.3+42.3, 37.8+37.5, 28.1, 27.3, 19.5+19.4.

ESI-HRMS: calcd for  $C_{32}H_{36}N_2O_7Na^+$   $[M+Na^+]$  583.2415, found 583.2422.

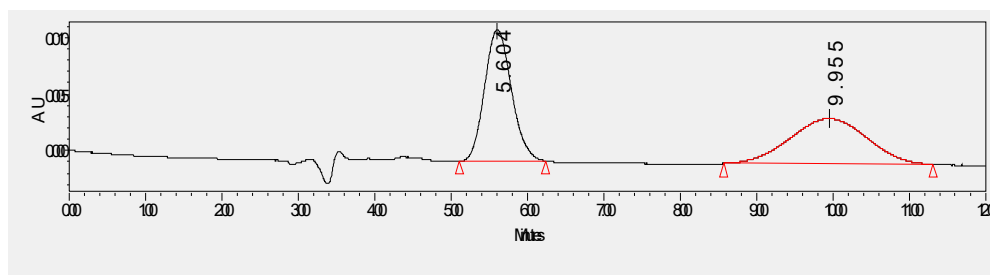

|   | Retention Time | Area   | % Area |
|---|----------------|--------|--------|
| 1 | 5.604          | 285435 | 50.43  |
| 2 | 9.955          | 280523 | 49.57  |

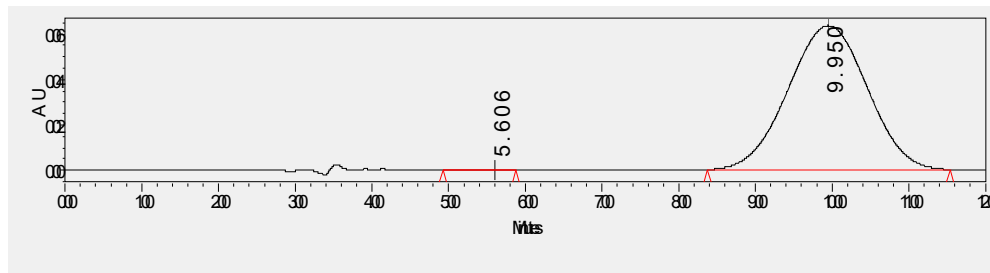

|   | Retention Time | Area    | % Area |
|---|----------------|---------|--------|
| 1 | 5.606          | 1280    | 0.03   |
| 2 | 9.950          | 4561376 | 99.97  |

1',3-di-tert-butyl 6-phenyl (1S,2R,3R,4S)-8-benzyl-2'-oxo-6-azaspiro[bicyclo[2.2.2]octane-2,3'-indolin]-7-ene-1',3,6-tricarboxylate (**5i**)

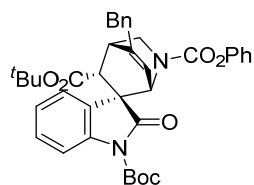

( $C_{38}H_{40}N_2O_7$ ) white amorphous solid; 99% yield, >95:5 dr, 99% ee.  $[\alpha]_D^{34}$   
 = 60.8 ( $c = 1.28$ , in  $CH_2Cl_2$ ), HPLC DAICEL CHIRALCEL IA, 2-  
 propanol/*n*-hexane = 30/70, flow rate = 1.0 mL/min,  $\lambda = 254$  nm, retention  
 time:  $t_{minor} = 6.81$  min,  $t_{major} = 11.12$  min.  $^1H$  NMR (400 MHz,  $CDCl_3$ )

mixture of rotamers  $\delta$  7.90+7.85 (d,  $J = 8.0$  Hz, 1H), 7.43–7.27 (m, 6H), 7.26–7.02 (m, 6H), 6.64–  
 6.60 (m, 1H), 6.34–6.10 (m, 1H), 4.60+4.58 (d,  $J = 6.0$  Hz, 1H), 4.16+3.99 (dd,  $J = 11.0, 2.0$  Hz,  
 1H), 3.77–3.49 (m, 2H), 3.27–3.05 (m, 2H), 2.98+2.95 (t,  $J = 2.0$  Hz, 1H), 1.66+1.65 (s, 9H),  
 0.91+0.90 (s, 9H).  $^{13}C$  NMR (100 MHz,  $CDCl_3$ ) mixture of rotamers  $\delta$  175.2+175.0, 169.7+169.4,  
 153.4+152.8, 151.1+150.6, 149.0+148.9, 147.9+147.2, 139.9+139.8, 137.4+137.3, 129.4,  
 129.2+129.0, 129.0+128.8, 128.7+128.7, 127.8+127.3, 126.7+126.7, 125.4+125.2, 124.9,  
 124.5+124.2, 124.4+124.3, 121.8+121.5, 115.1+114.9, 84.8+84.7, 81.4, 55.6+55.1, 54.1+53.3,  
 48.1+48.1, 43.0+42.9, 40.3+40.2, 36.3+36.0, 28.1, 27.3. ESI-HRMS: calcd for  $C_{38}H_{40}N_2O_7Na^+$   
 $[M+Na^+]$  659.2728, found 659.2734.

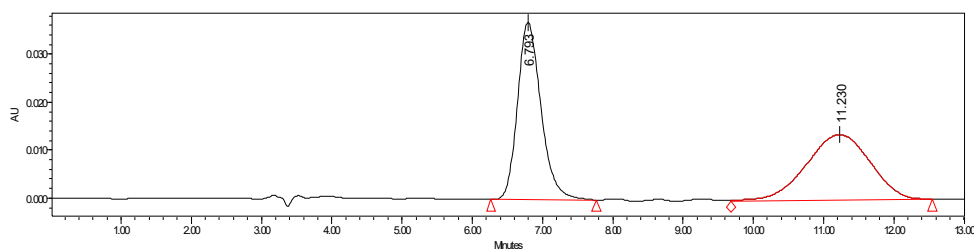

|   | Retention Time | Area   | % Area |
|---|----------------|--------|--------|
| 1 | 6.793          | 859759 | 49.69  |
| 2 | 11.230         | 870533 | 50.31  |

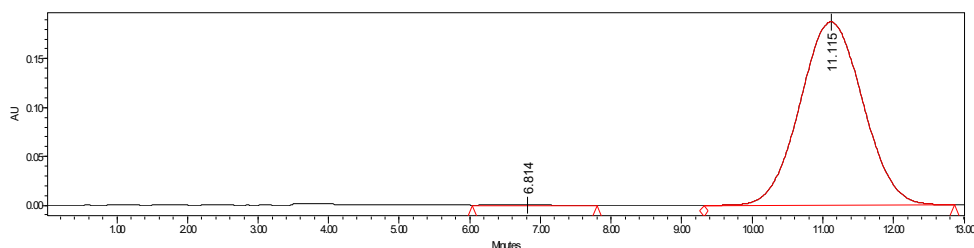

|   | Retention Time | Area     | % Area |
|---|----------------|----------|--------|
| 1 | 6.814          | 8981     | 0.08   |
| 2 | 11.115         | 11575445 | 99.92  |

1',3-di-tert-butyl 6-phenyl (1S,2R,3R,4S)-2'-oxo-8-phenyl-6-azaspiro[bicyclo[2.2.2]octane-2,3'-indolin]-7-ene-1',3,6-tricarboxylate (**5j**)

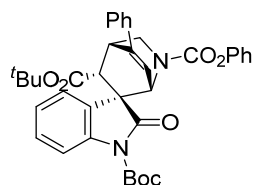

( $C_{37}H_{38}N_2O_7$ ) white amorphous solid; 95% yield, >95:5 dr, 92% ee.  $[\alpha]_D^{34}$   
 = 82.0 ( $c = 1.04$ , in  $CH_2Cl_2$ ), HPLC DAICEL CHIRALCEL IA, 2-  
 propanol/*n*-hexane = 30/70, flow rate = 1.0 mL/min,  $\lambda = 254$  nm, retention  
 time:  $t_{minor1-minor} = 4.35$  min,  $t_{minor1-major\&minor2-major} = 4.65$  min,  $t_{minor2-minor} =$

5.82 min,  $t_{major-minor} = 7.35$  min,  $t_{major-major} = 15.51$  min.  $^1H$  NMR (400 MHz,  $CDCl_3$ ) mixture of rotamers  $\delta$  7.95+7.90 (d,  $J = 8.0$  Hz, 1H), 7.67–7.52 (m, 2H), 7.45–7.30 (m, 5H), 7.25–7.03 (m, 5H), 6.81–6.75 (m, 1H), 6.69–6.62 (m, 1H), 4.79 (dd,  $J = 11.0, 6.0$  Hz, 1H), 4.39+4.22 (dd,  $J = 11.0, 2.0$  Hz, 1H), 3.89 (s, 1H), 3.61–3.40 (m, 1H), 3.13+3.11 (t,  $J = 2.0$  Hz, 1H), 1.64 (s, 9H), 0.94+0.93 (s, 9H).  $^{13}C$  NMR (100 MHz,  $CDCl_3$ ) mixture of rotamers  $\delta$  175.0+174.9, 169.7+169.4, 153.5+152.9, 151.1+150.6, 149.0+148.9, 146.7+146.1, 140.1+140.0, 136.1+136.0, 129.3+129.1, 129.1+128.9, 128.8, 128.5+128.5, 127.5+127.1, 125.7+125.6, 125.4+125.3, 125.0+124.6, 124.4+124.4, 124.3+123.6, 121.7+121.5, 115.2+115.0, 84.8+84.7, 81.5+81.5, 55.3+54.9, 54.1+53.3, 48.5+48.4, 43.0+43.0, 35.3+35.1, 28.1, 27.3. ESI-HRMS: calcd for  $C_{37}H_{38}N_2O_7Na^+$  [ $M+Na^+$ ] 645.2571, found 645.2578.

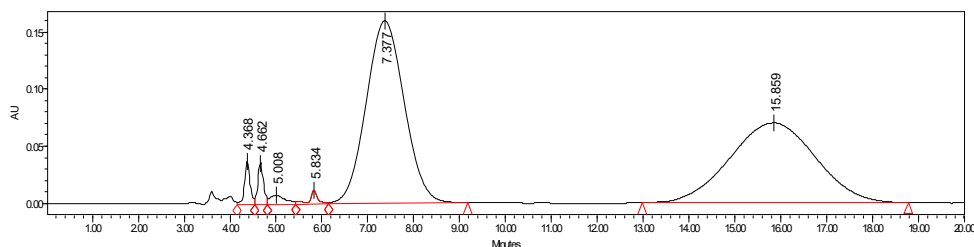

|   | Retention Time | Area    | % Area |
|---|----------------|---------|--------|
| 1 | 4.368          | 321733  | 1.66   |
| 2 | 4.662          | 312471  | 1.62   |
| 3 | 5.008          | 192700  | 1.00   |
| 4 | 5.834          | 148003  | 0.77   |
| 5 | 7.377          | 9242740 | 47.80  |
| 6 | 15.859         | 9120226 | 47.16  |

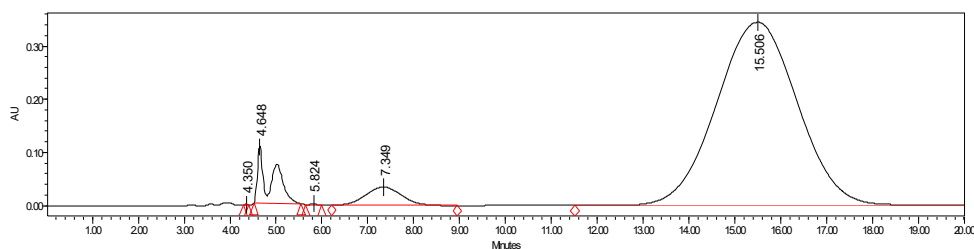

|   | Retention Time | Area     | % Area |
|---|----------------|----------|--------|
| 1 | 4.350          | 2237     | 0.00   |
| 2 | 4.648          | 2187107  | 4.73   |
| 3 | 5.824          | 14823    | 0.03   |
| 4 | 7.349          | 1776659  | 3.85   |
| 5 | 15.506         | 42215082 | 91.38  |

di-tert-butyl (1R,2R,6R)-2-((tert-butoxycarbonyl)amino)-2'-oxospiro[cyclohexane-1,3'-indoline]-1',6-dicarboxylate (**6a**)

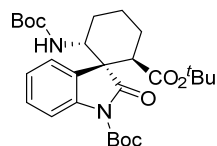

(C<sub>28</sub>H<sub>40</sub>N<sub>2</sub>O<sub>7</sub>) white amorphous solid; 99% yield, >95:5 dr, 99% ee. [ $\alpha$ ]<sub>D</sub><sup>34</sup> = -29.5 (c = 0.73, in CH<sub>2</sub>Cl<sub>2</sub>), HPLC DAICEL CHIRALCEL IB, 2-propanol/*n*-hexane = 5/95, flow rate = 1.0 mL/min,  $\lambda$  = 254 nm, retention time:  $t_{major}$  =

4.43 min,  $t_{minor}$  = 6.90 min. <sup>1</sup>H NMR (400 MHz, CDCl<sub>3</sub>)  $\delta$  7.92 (d,  $J$  = 8.0 Hz, 1H), 7.48 (d,  $J$  = 8.0 Hz, 1H), 7.34–7.28 (m, 1H), 7.09 (td,  $J$  = 8.0, 1.0 Hz, 1H), 5.15 (d,  $J$  = 9.0 Hz, 1H), 3.90 (s, 1H), 3.05 (dd,  $J$  = 12.0, 5.0 Hz, 1H), 2.29–2.20 (m, 1H), 2.00–1.88 (m, 4H), 1.62 (s, 9H), 1.39 (s, 9H), 1.05 (s, 9H), 0.90–0.85 (m, 1H). <sup>13</sup>C NMR (100 MHz, CDCl<sub>3</sub>)  $\delta$  175.5, 170.7, 155.0, 149.4, 139.8, 129.8, 128.4, 124.6, 123.7, 115.0, 83.9, 81.5, 79.4, 52.5, 51.0, 43.7, 28.3, 28.1, 27.3, 25.5, 23.1, 18.7. ESI-HRMS: calcd for C<sub>28</sub>H<sub>40</sub>N<sub>2</sub>O<sub>7</sub>Na<sup>+</sup> [M+Na<sup>+</sup>] 539.2728, found 539.2755.

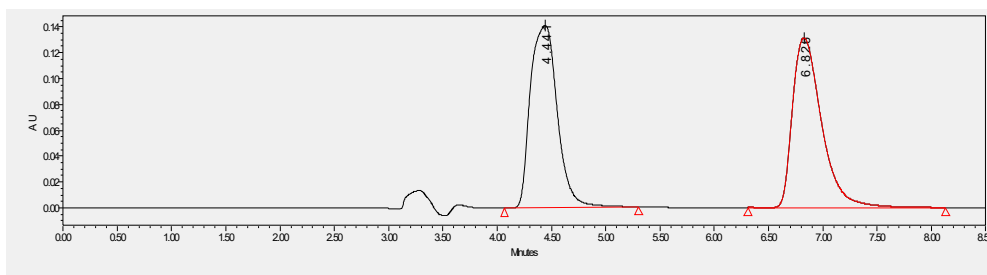

|   | Retention Time | Area    | % Area |
|---|----------------|---------|--------|
| 1 | 4.441          | 2427462 | 50.02  |
| 2 | 6.826          | 2425924 | 49.98  |

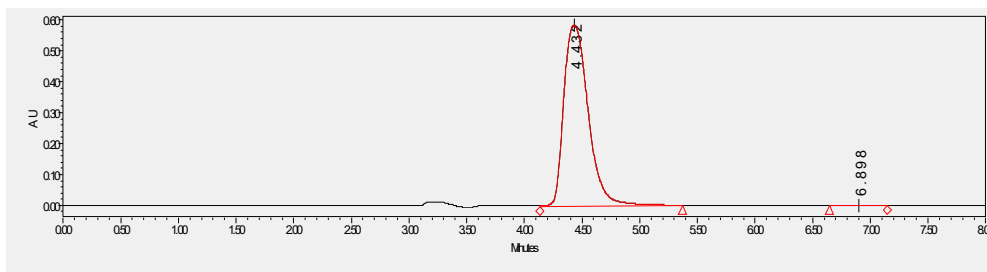

|   | Retention Time | Area    | % Area |
|---|----------------|---------|--------|
| 1 | 4.432          | 8675541 | 99.85  |
| 2 | 6.898          | 12648   | 0.15   |

1',3-di-tert-butyl 6-methyl (1S,2R,3R,4R)-2'-oxo-6-azaspiro[bicyclo[2.2.2]octane-2,3'-indoline]-1',3,6-tricarboxylate (**6b**)

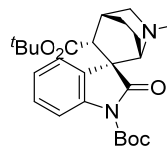

(C<sub>26</sub>H<sub>34</sub>N<sub>2</sub>O<sub>7</sub>) white powder, mp 124.0–126.0 °C; 94% yield, >95:5 dr, 99% ee. [α]<sub>D</sub><sup>21</sup> = 12.8 (c = 0.51, in CH<sub>2</sub>Cl<sub>2</sub>), HPLC DAICEL CHIRALCEL IA, 2-propanol/*n*-hexane = 10/90, flow rate = 1.0 mL/min, λ = 254 nm, retention

time: *t*<sub>minor</sub> = 7.28 min, *t*<sub>major</sub> = 9.42 min. <sup>1</sup>H NMR (400 MHz, CDCl<sub>3</sub>) mixture of rotamers δ 7.86 (t, *J* = 9.0 Hz, 1H), 7.39–7.29 (m, 1H), 7.13–7.03 (m, 1H), 6.92 (d, *J* = 8.0 Hz, 1H), 3.98–3.76 (m, 2H), 3.68–3.36 (m, 4H), 3.24 (s, 1H), 2.64–2.45 (m, 2H), 1.96–1.76 (m, 3H), 1.65 (s, 9H), 0.89 (s, 9H). <sup>13</sup>C NMR (100 MHz, CDCl<sub>3</sub>) mixture of rotamers δ 175.9+175.8, 169.6+169.3, 156.1+155.9, 149.1+149.0, 139.5+139.3, 128.6+128.5, 128.6+128.3, 124.8+124.3, 124.3, 114.8+114.5, 84.6+84.5, 80.9, 54.6+54.5, 52.7+52.3, 50.7+50.1, 47.8+47.7, 45.9+45.8, 28.1, 27.2, 27.1+26.9, 25.2+25.1, 20.4+20.1. ESI-HRMS: calcd for C<sub>26</sub>H<sub>34</sub>N<sub>2</sub>O<sub>7</sub>Na<sup>+</sup> [M+Na<sup>+</sup>] 509.2258, found 509.2267.

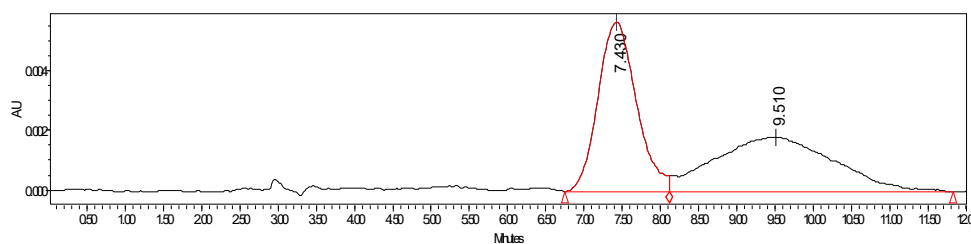

|   | Retention Time | Area   | % Area |
|---|----------------|--------|--------|
| 1 | 7.430          | 199080 | 49.88  |
| 2 | 9.510          | 200041 | 50.12  |

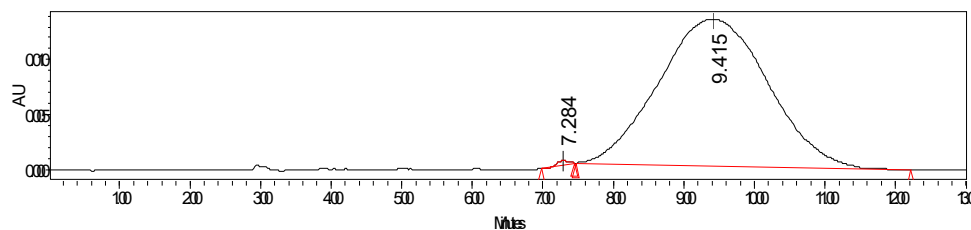

|   | Retention Time | Area    | % Area |
|---|----------------|---------|--------|
| 1 | 7.284          | 4194    | 0.29   |
| 2 | 9.415          | 1437899 | 99.71  |



tert-butyl (1R,2R,6R)-2-(((benzyloxy)carbonyl)amino)-2'-oxospiro[cyclohexane-1,3'-indolin]-3-ene-6-carboxylate (**6c**)

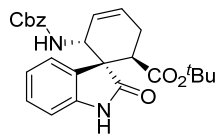

(C<sub>26</sub>H<sub>28</sub>N<sub>2</sub>O<sub>5</sub>) white amorphous solid; 99% yield, >95:5 dr, 98% ee. [ $\alpha$ ]<sub>D</sub><sup>17</sup> =

-100.4 (c = 1.02, in CH<sub>2</sub>Cl<sub>2</sub>), HPLC DAICEL CHIRALCEL IA, 2-propanol/*n*-

hexane = 30/70, flow rate = 1.0 mL/min,  $\lambda$  = 254 nm, retention time:  $t_{minor}$  =

7.17 min,  $t_{major}$  = 8.21 min. <sup>1</sup>H NMR (400 MHz, CDCl<sub>3</sub>)  $\delta$  8.74 (s, 1H), 7.40–7.26 (m, 5H), 7.19–

7.08 (m, 2H), 6.98–6.77 (m, 2H), 6.20–5.82 (m, 2H), 5.54 (d,  $J$  = 8.0 Hz, 1H), 5.16 (d,  $J$  = 12.0 Hz,

1H), 5.00 (d,  $J$  = 12.0 Hz, 1H), 4.19 (dd,  $J$  = 9.0, 5.0 Hz, 1H), 3.20 (dd,  $J$  = 10.0, 6.0 Hz, 1H), 2.86–

2.51 (m, 2H), 1.20 (s, 9H). <sup>13</sup>C NMR (100 MHz, CDCl<sub>3</sub>)  $\delta$  178.9, 171.0, 156.0, 141.2, 136.5, 130.2,

129.3, 128.4, 128.2, 128.0, 127.9, 125.3, 124.5, 121.9, 110.1, 81.4, 66.9, 51.3, 50.9, 41.0, 27.6, 25.7.

ESI-HRMS: calcd for C<sub>26</sub>H<sub>28</sub>N<sub>2</sub>O<sub>5</sub>Na<sup>+</sup> [M+Na<sup>+</sup>] 471.1890, found 471.1891.

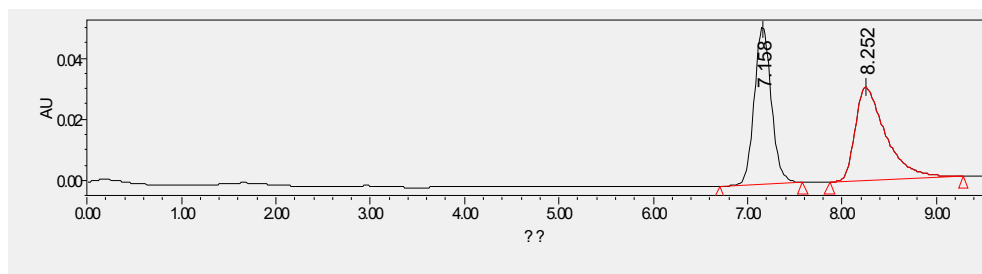

|   | Retention Time | Area   | % Area |
|---|----------------|--------|--------|
| 1 | 7.158          | 642270 | 48.31  |
| 2 | 8.252          | 687158 | 51.69  |

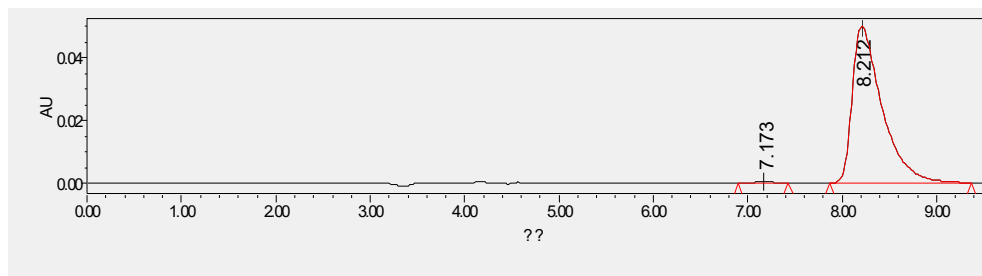

|   | Retention Time | Area    | % Area |
|---|----------------|---------|--------|
| 1 | 7.173          | 9050    | 0.82   |
| 2 | 8.212          | 1098305 | 99.18  |

di-tert-butyl (1R,2R,6R)-2-amino-2'-oxospiro[cyclohexane-1,3'-indoline]-1',6-dicarboxylate (**6d**)

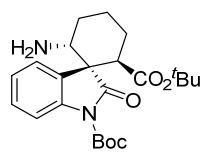

(C<sub>23</sub>H<sub>32</sub>N<sub>2</sub>O<sub>5</sub>) white amorphous solid; 89% yield, 73:27 dr, 99% ee. HPLC

DAICEL CHIRALCEL IE, 2-propanol/*n*-hexane = 30/70, flow rate = 1.0

mL/min, λ = 254 nm, retention time:  $t_{major-minor}$  = 5.20 min,  $t_{major-major}$  = 6.70 min,

$t_{minor-major}$  = 10.42 min. <sup>1</sup>H NMR (400 MHz, CDCl<sub>3</sub>) δ 7.99–7.72 (m, 1H), 7.49–7.32 (m, 1H), 7.30–

7.21 (m, 1H), 7.12–6.99 (m, 1H), 3.25–2.79 (m, 2H), 2.28–1.63 (m, 6H), 1.57 (s, 9H), 1.51–1.35

(m, 2H), 1.01 (s, 6.57H), 0.96 (s, 2.43H). <sup>13</sup>C NMR (100 MHz, CDCl<sub>3</sub>) δ 176.7, 171.5, 149.4, 139.8,

130.5, 128.2, 124.8, 123.8, 114.7, 84.2, 81.2, 54.3, 52.3, 43.1, 28.1, 27.4, 26.7, 22.9, 17.9. ESI-

HRMS: calcd for C<sub>23</sub>H<sub>32</sub>N<sub>2</sub>O<sub>5</sub>Na<sup>+</sup> [M+Na<sup>+</sup>] 439.2203, found 439.2208.

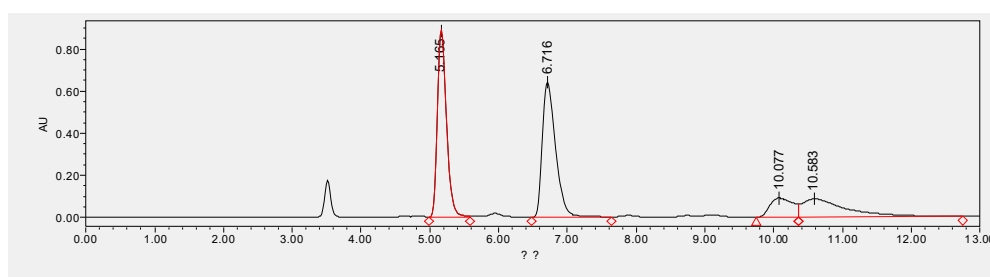

|   | Retention Time | Area    | % Area |
|---|----------------|---------|--------|
| 1 | 5.165          | 8214295 | 36.01  |
| 2 | 6.716          | 8675522 | 38.03  |
| 3 | 10.077         | 2007035 | 8.80   |
| 4 | 10.583         | 3912518 | 17.15  |

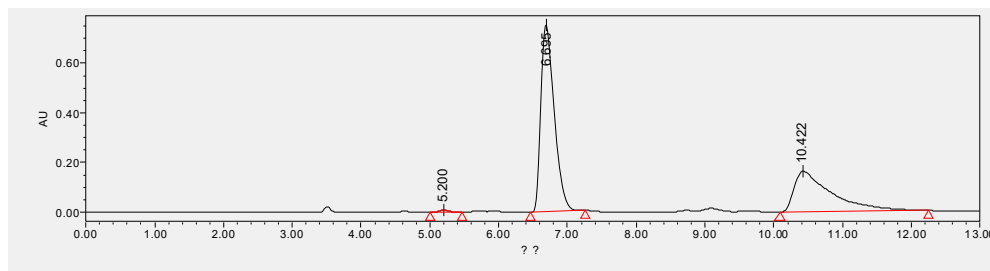

|   | Retention Time | Area     | % Area |
|---|----------------|----------|--------|
| 1 | 5.200          | 68141    | 0.41   |
| 2 | 6.695          | 10211367 | 62.11  |
| 3 | 10.422         | 6161608  | 37.48  |

6-benzyl 3-(tert-butyl) (1S,2R,3R,4R)-2'-oxo-6-azaspiro[bicyclo[2.2.2]octane-2,3'-indolin]-7-ene-3,6-dicarboxylate (**6e**)

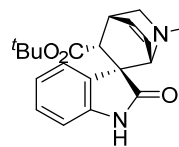

( $C_{27}H_{28}N_2O_5$ ) white amorphous solid; 99% yield, >95:5 dr, 99% ee.  $[\alpha]_D^{17} = 64.2$  ( $c = 1.27$ , in  $CH_2Cl_2$ ), HPLC DAICEL CHIRALCEL IC, 2-propanol/*n*-hexane = 30/70, flow rate = 1.0 mL/min,  $\lambda = 254$  nm, retention time:  $t_{minor} = 12.58$  min,  $t_{major} = 21.88$  min.  $^1H$  NMR (400 MHz,  $CDCl_3$ ) mixture of rotamers  $\delta$  8.83+8.72 (s, 1H), 7.39–7.17 (m, 5H), 7.05–6.65 (m, 5H), 6.63–6.42 (m, 1H), 5.25–4.76 (m, 2H), 4.58+4.46 (dd,  $J = 6.0, 2.0$  Hz, 1H), 4.14–4.03 (m, 1H), 3.42–3.12 (m, 2H), 2.94+2.90 (t,  $J = 2.0$  Hz, 1H), 0.94+0.90 (s, 9H).  $^{13}C$  NMR (100 MHz,  $CDCl_3$ ) mixture of rotamers  $\delta$  178.7+178.6, 170.1+169.7, 155.3+154.7, 141.1+141.0, 136.8+136.3, 135.2+134.7, 131.7+131.0, 129.0+128.6, 128.5, 128.3, 128.0, 127.7+127.5, 125.4+124.9, 122.7+122.5, 109.9+109.7, 81.1+81.1, 67.0+66.8, 54.8+54.3, 52.3+51.7, 47.1+46.9, 42.4+42.2, 32.4+32.2, 27.4+27.4. ESI-HRMS: calcd for  $C_{27}H_{28}N_2O_5Na^+$   $[M+Na^+]$  483.1890, found 483.1889.

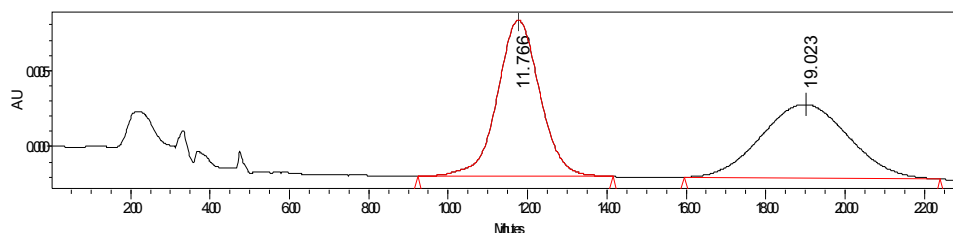

|   | Retention Time | Area   | % Area |
|---|----------------|--------|--------|
| 1 | 11.766         | 766328 | 50.55  |
| 2 | 19.023         | 749720 | 49.45  |

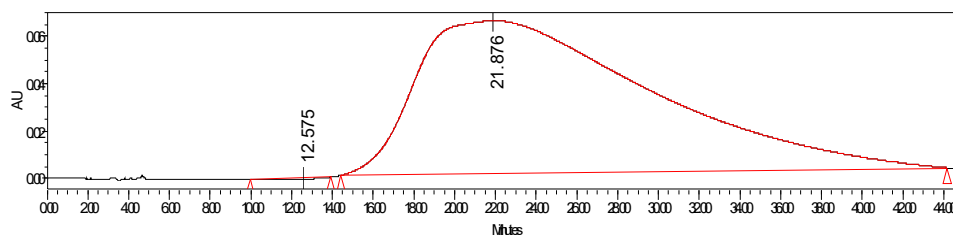

|   | Retention Time | Area     | % Area |
|---|----------------|----------|--------|
| 1 | 12.575         | 72235    | 0.14   |
| 2 | 21.876         | 51424886 | 99.86  |

## (F) Control experiments

methyl (1R,2R,6R)-1'-acetyl-2-(((benzyloxy)carbonyl)amino)-2'-oxospiro[cyclohexane-1,3'-indolin]-3-ene-6-carboxylate (**7d**)

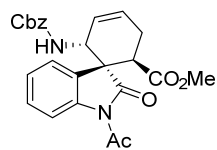

(C<sub>25</sub>H<sub>24</sub>N<sub>2</sub>O<sub>6</sub>) white amorphous solid; 84% yield, 67:33 dr, 38/40% ee. HPLC DAICEL CHIRALCEL IB, 2-propanol/*n*-hexane = 10/90, flow rate = 1.0 mL/min,  $\lambda$  = 254 nm, retention time:  $t_{major-major}$  = 14.02 min,  $t_{major-minor}$  = 16.23

min,  $t_{minor-minor}$  = 22.64 min,  $t_{minor-major}$  = 23.73 min. ESI-HRMS: calcd for C<sub>25</sub>H<sub>24</sub>N<sub>2</sub>O<sub>6</sub>Na<sup>+</sup> [M+Na<sup>+</sup>] 471.1527, found 471.1529.

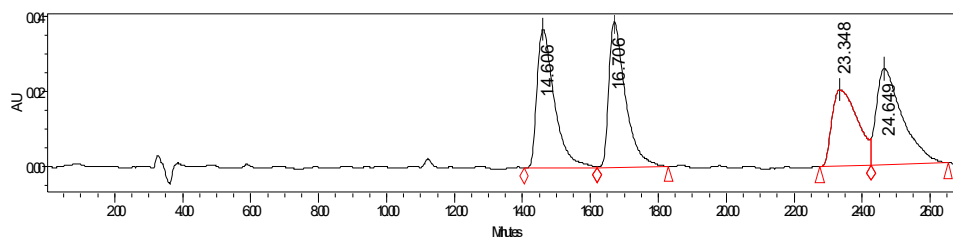

|   | Retention Time | Area    | % Area |
|---|----------------|---------|--------|
| 1 | 14.606         | 1309080 | 26.06  |
| 2 | 16.706         | 1297630 | 25.84  |
| 3 | 23.348         | 1066016 | 21.22  |
| 4 | 24.649         | 1349984 | 26.88  |

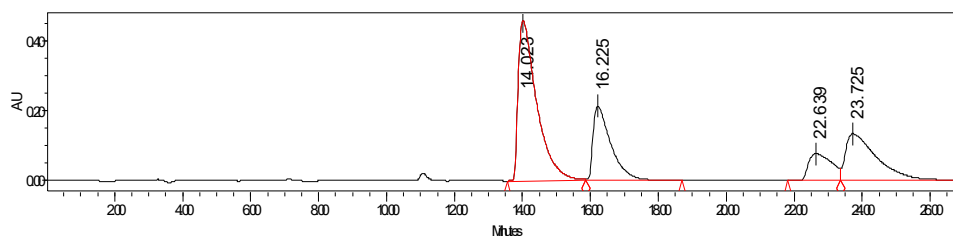

|   | Retention Time | Area     | % Area |
|---|----------------|----------|--------|
| 1 | 14.023         | 17433410 | 46.43  |
| 2 | 16.225         | 7839662  | 20.88  |
| 3 | 22.639         | 3685106  | 9.81   |
| 4 | 23.725         | 8588001  | 22.87  |

1'-ethyl 6-methyl (1R,2R,6R)-2-(((benzyloxy)carbonyl)amino)-2'-oxospiro[cyclohexane-1,3'-indolin]-3-ene-1',6-dicarboxylate (**7e**)

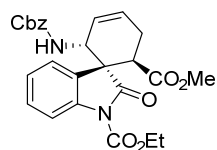

(C<sub>26</sub>H<sub>26</sub>N<sub>2</sub>O<sub>7</sub>) white amorphous solid; 87% yield, 99:1 dr, 90% ee. HPLC

DAICEL CHIRALCEL IA, 2-propanol/*n*-hexane = 30/70, flow rate = 1.0

mL/min,  $\lambda$  = 254 nm, retention time:  $t_{major-minor}$  = 8.27 min,  $t_{minor-major}$  = 9.31

min,  $t_{major-major}$  = 11.89 min. ESI-HRMS: calcd for C<sub>26</sub>H<sub>26</sub>N<sub>2</sub>O<sub>7</sub>Na<sup>+</sup> [M+Na<sup>+</sup>] 501.1632, found 501.1640.

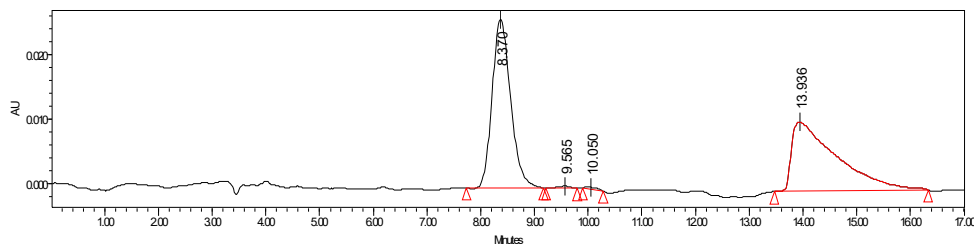

|   | Retention Time | Area   | % Area |
|---|----------------|--------|--------|
| 1 | 8.370          | 626686 | 49.61  |
| 2 | 9.565          | 5257   | 0.42   |
| 3 | 10.050         | 4648   | 0.37   |
| 4 | 13.936         | 626607 | 49.60  |

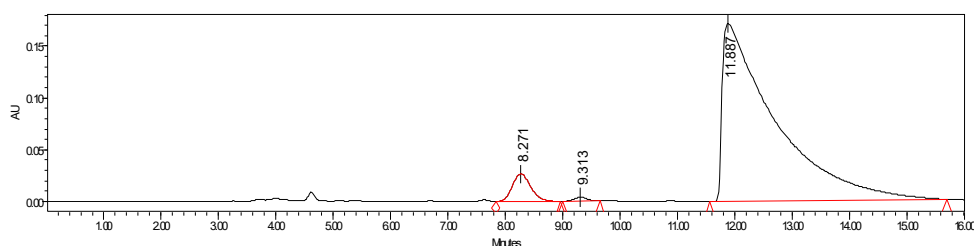

|   | Retention Time | Area     | % Area |
|---|----------------|----------|--------|
| 1 | 8.271          | 600899   | 5.16   |
| 2 | 9.313          | 59212    | 0.51   |
| 3 | 11.887         | 10977234 | 94.33  |

1'-(tert-butyl) 6-methyl (1R,2R,6R)-2-(((benzyloxy)carbonyl)(methyl)amino)-2'-oxospiro [cyclohexane-1,3'-indolin]-3-ene-1',6-dicarboxylate (**7f**)

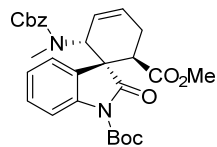

(C<sub>29</sub>H<sub>32</sub>N<sub>2</sub>O<sub>7</sub>) white amorphous solid; 91% yield, 98:2 dr, 94% ee. HPLC

DAICEL CHIRALCEL AD-H, 2-propanol/*n*-hexane = 30/70, flow rate = 1.0

mL/min,  $\lambda$  = 254 nm, retention time:  $t_{major-major}$  = 4.79 min,  $t_{major-minor}$  = 5.65

min,  $t_{minor-minor}$  = 6.37 min,  $t_{minor-major}$  = 6.88 min. ESI-HRMS: calcd for C<sub>29</sub>H<sub>32</sub>N<sub>2</sub>O<sub>7</sub>Na<sup>+</sup> [M+Na<sup>+</sup>]

543.2102, found 543.2110.

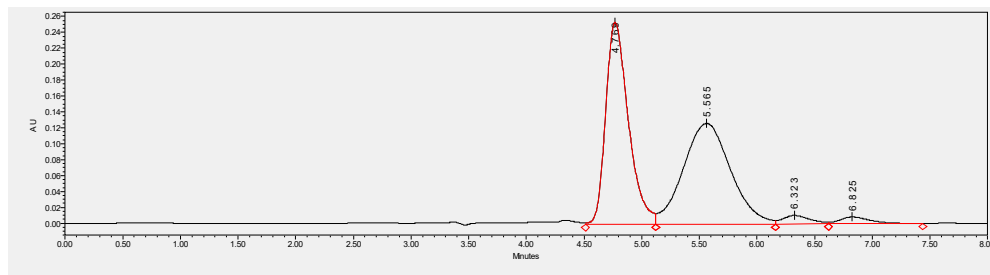

|   | Retention Time | Area    | % Area |
|---|----------------|---------|--------|
| 1 | 4.769          | 3484152 | 46.87  |
| 2 | 5.565          | 3612385 | 48.60  |
| 3 | 6.323          | 176992  | 2.38   |
| 4 | 6.825          | 160026  | 2.15   |

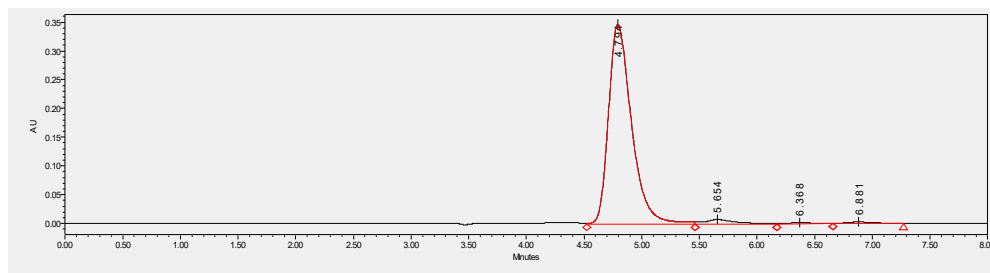

|   | Retention Time | Area    | % Area |
|---|----------------|---------|--------|
| 1 | 4.794          | 4843398 | 95.60  |
| 2 | 5.654          | 145926  | 2.88   |
| 3 | 6.368          | 31824   | 0.63   |
| 4 | 6.881          | 45281   | 0.89   |

## (G) Copies of NMR spectra for the products

### 3a

z01607081602Me2176015  
PROTON CDCl3 (D: Viatat: Zhovih 28  
6.15 6.13 6.12 6.11 5.88  
3.87 3.86 3.85 3.84  
3.12 3.11 3.09 3.08  
3.05 3.02 4.21 4.20  
4.19 4.17 3.52  
3.34 3.33 3.32  
3.30 2.81 2.79  
2.60 2.57 1.64  
1.63 1.55 1.53

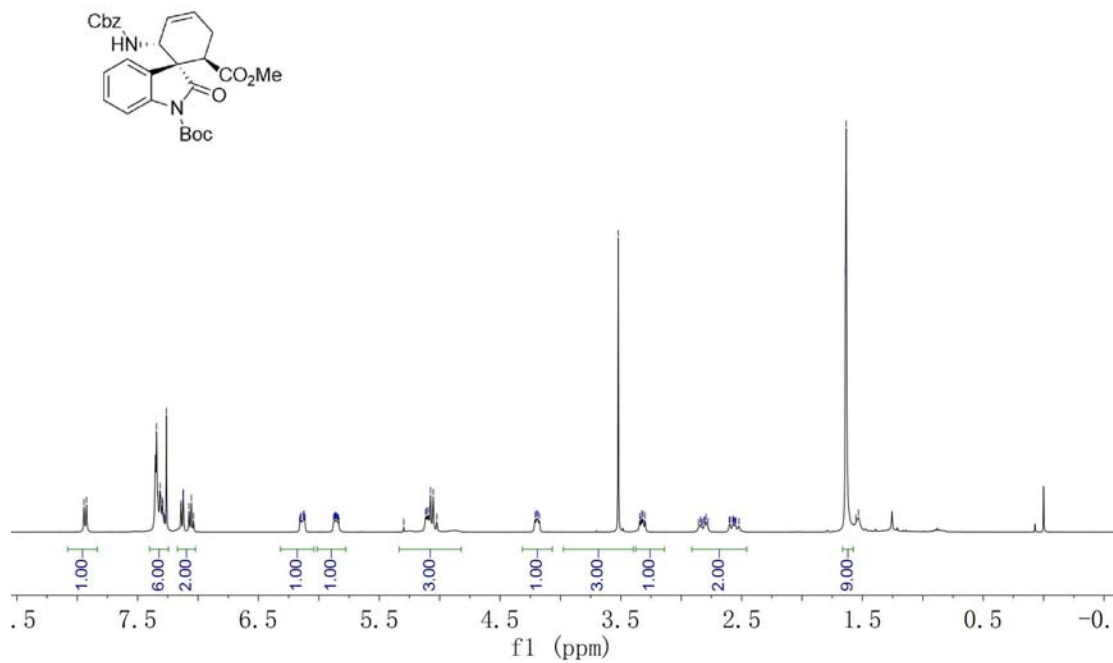

z01607081602Me2176015  
CDCl3 (D: Viatat: Zhovih 28  
133.67 133.67 133.67 133.67  
83.80 66.94 52.13  
51.56 50.87 41.12  
28.15 25.49

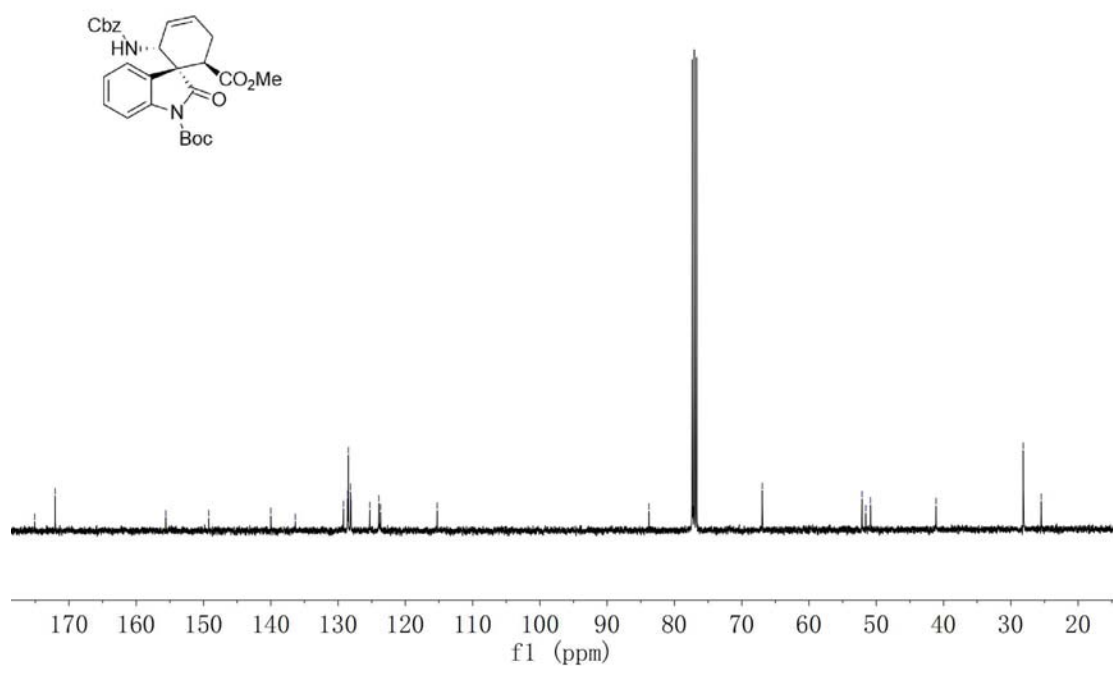

3b

zboayh-20160708-C02E16 0.0414  
 PROTON CDCl<sub>3</sub> (D): \data\zhobayh-25

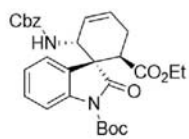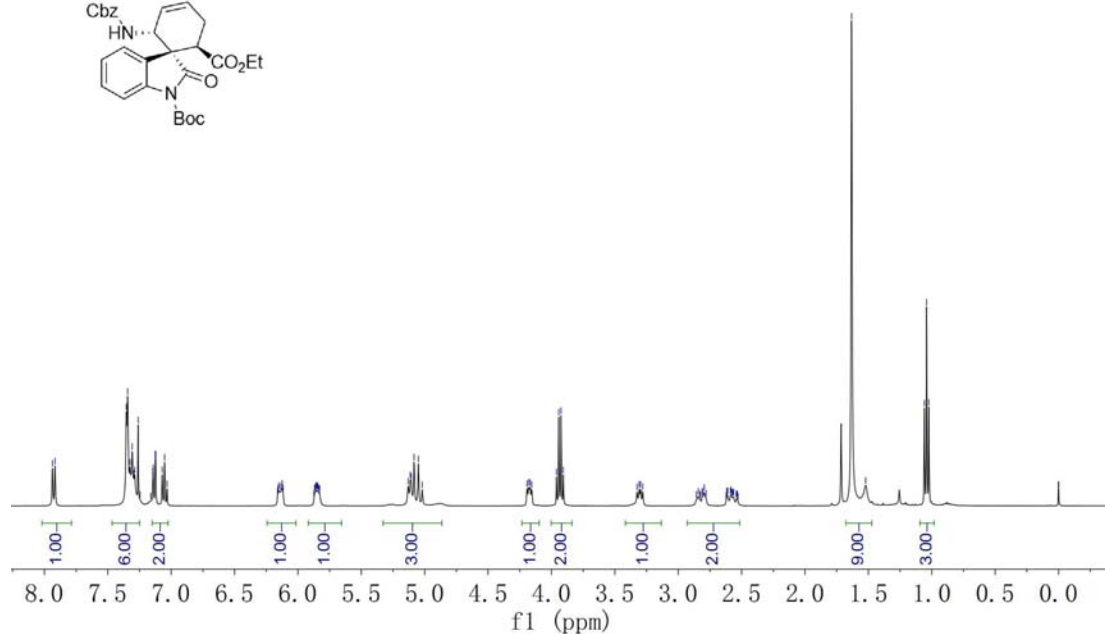

zboayh-20160708-C02E16 0.0414  
 CDCl<sub>3</sub> (D): \data\zhobayh-25

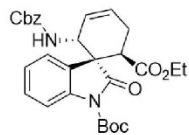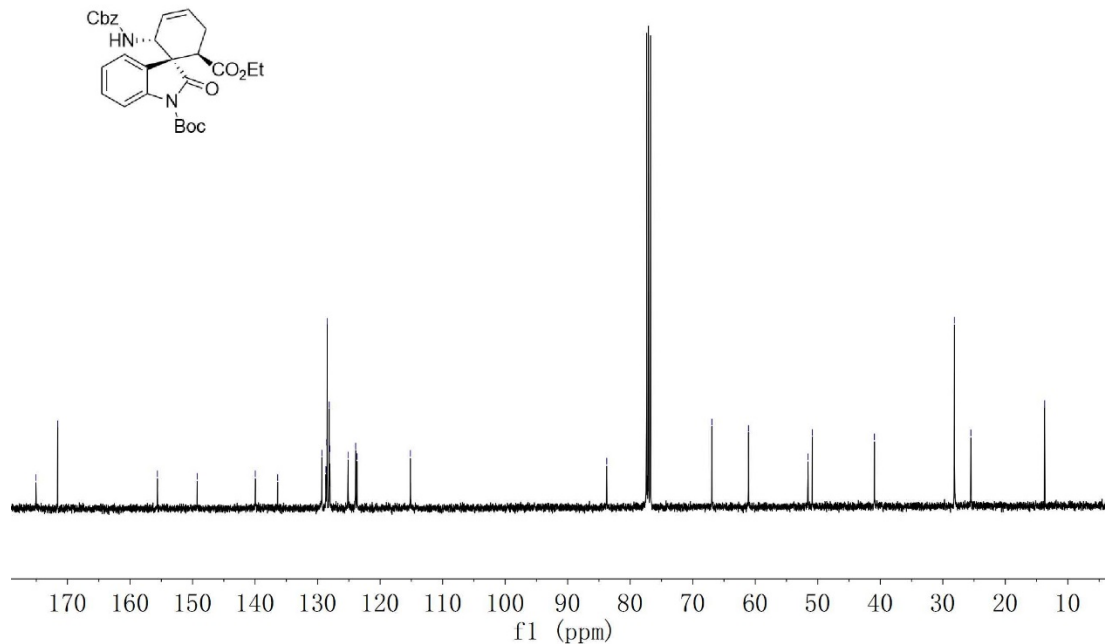





3d

zhuoh-20160706-02-02-01-01  
 PROTON CDCl<sub>3</sub> (4) Vial: zhuoh-11

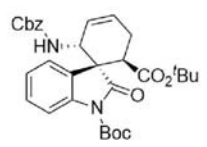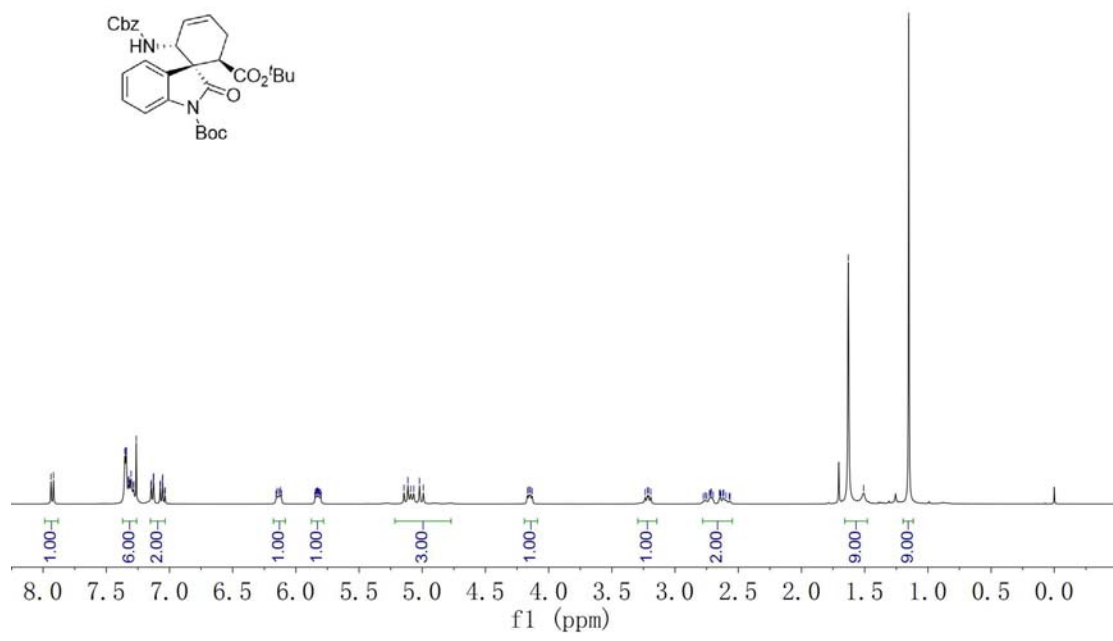

zhuoh-20160706-02-02-01-01  
 CDCl<sub>3</sub> (4) Vial: zhuoh-11

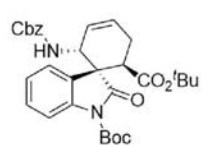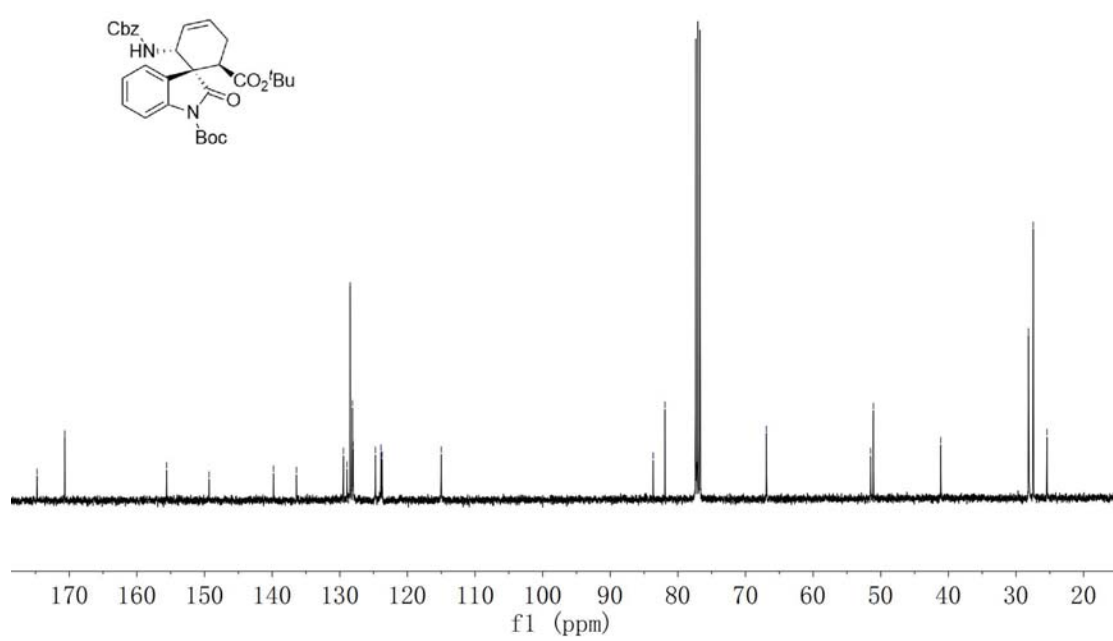

3e

zhuoyh-20160706-COPh-3  
 1H NMR (CDCl3) (4): Aromatic: 7.31, 7.30, 7.29, 7.28, 7.26, 7.16, 7.15, 7.14, 7.13, 7.07, 7.05, 7.03, 6.15, 6.13, 6.12, 5.93, 5.30, 5.27, 5.13, 5.10, 5.03, 5.00, 4.32, 4.31, 4.22, 4.21, 4.19, 4.18, 2.80, 1.61, 1.51

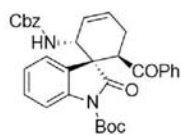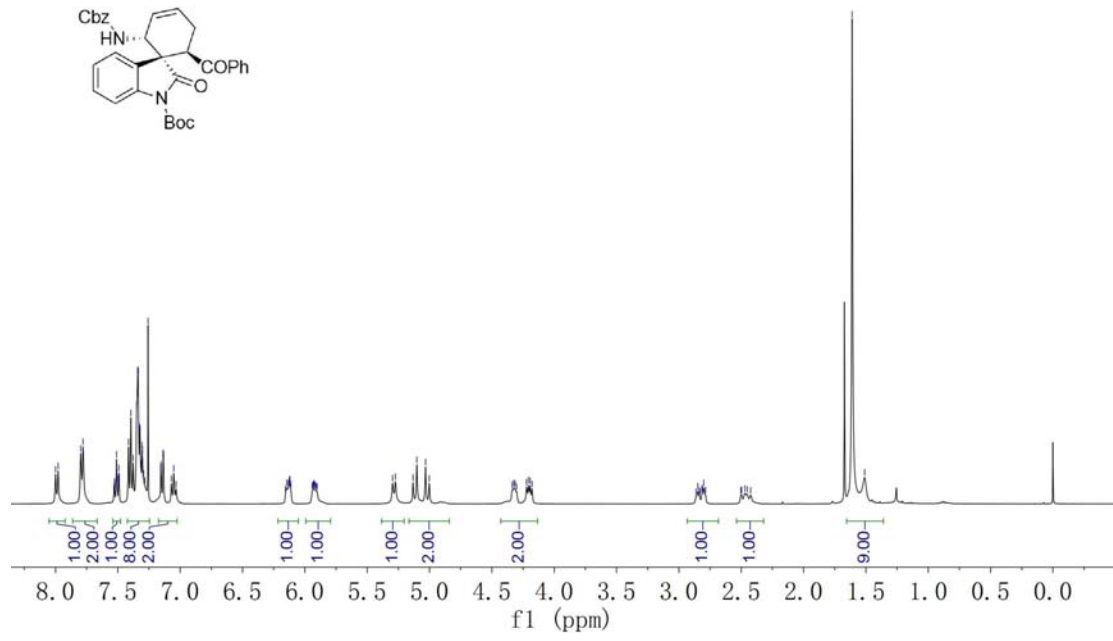

zhuoyh-20160706-COPh-3  
 13C NMR (CDCl3) (4): 175.14, 174.92, 173.63, 173.63, 173.63, 128.56, 128.50, 128.21, 128.11, 125.99, 123.91, 123.75, 115.25, 83.78, 66.96, 52.11, 51.47, 44.47, 28.14, 27.12

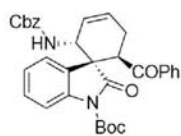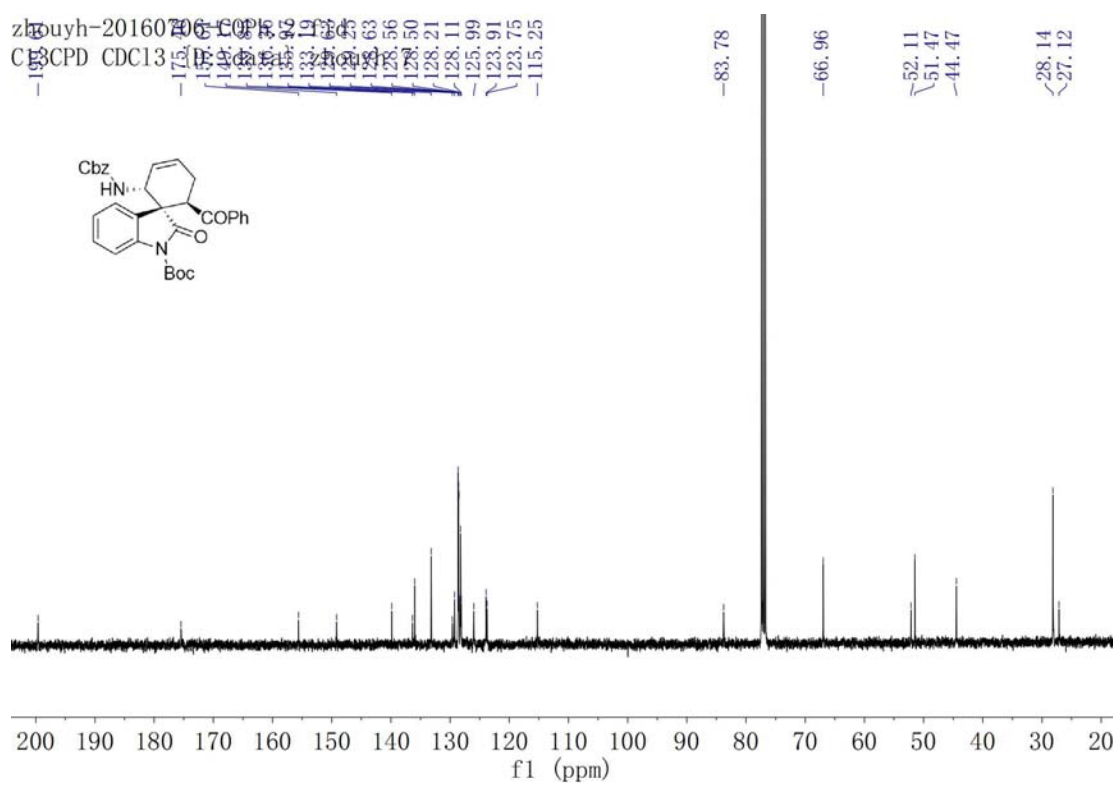

3f

zhouyh-20160706-5f-1.fid  
 PROTON CDCl3 1D 128 data 7.04 7.02 7.01 6.99 6.88 6.86 6.86 6.17 6.15 6.14 6.13 5.84 5.84 5.83 5.82 5.82 5.81 5.81 5.14 5.11 5.06 5.03 5.02 4.99 4.14 4.14 4.13 4.12 4.10 3.24 3.22 3.21 3.19 2.73 1.62 1.50 1.18 -0.00

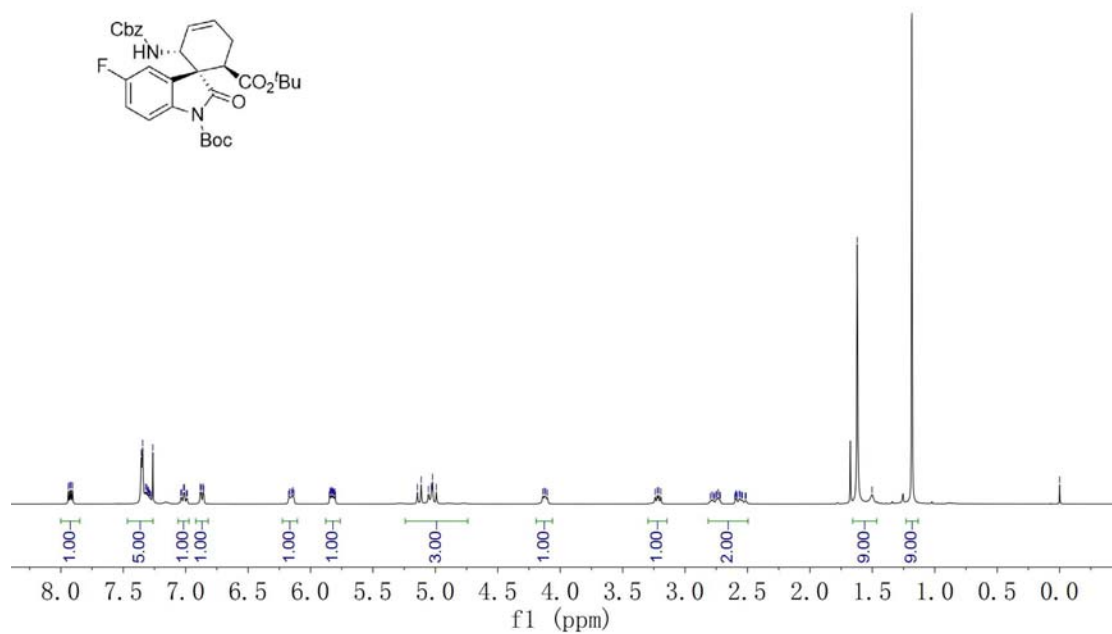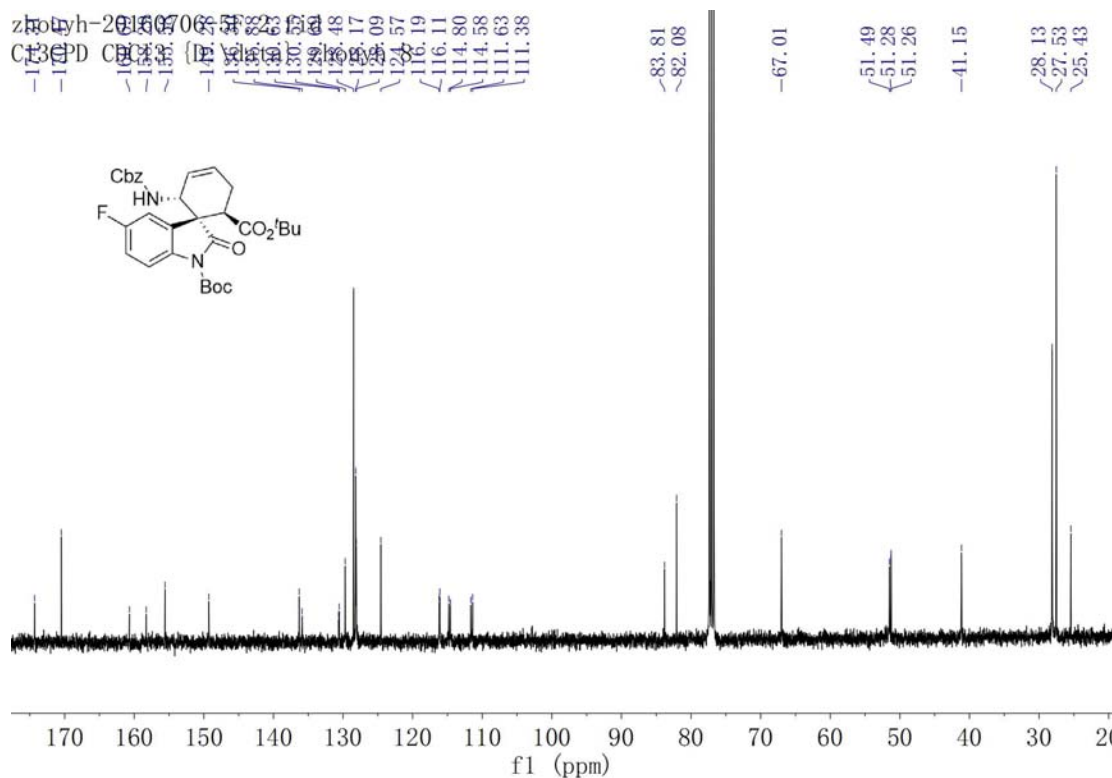













3k

zhong-20160711134116  
 13C NMR CDCl<sub>3</sub> (4): 87.30, 84.01, 82.14, 67.01, 51.54, 51.05, 41.22, 28.12, 27.57, 25.45

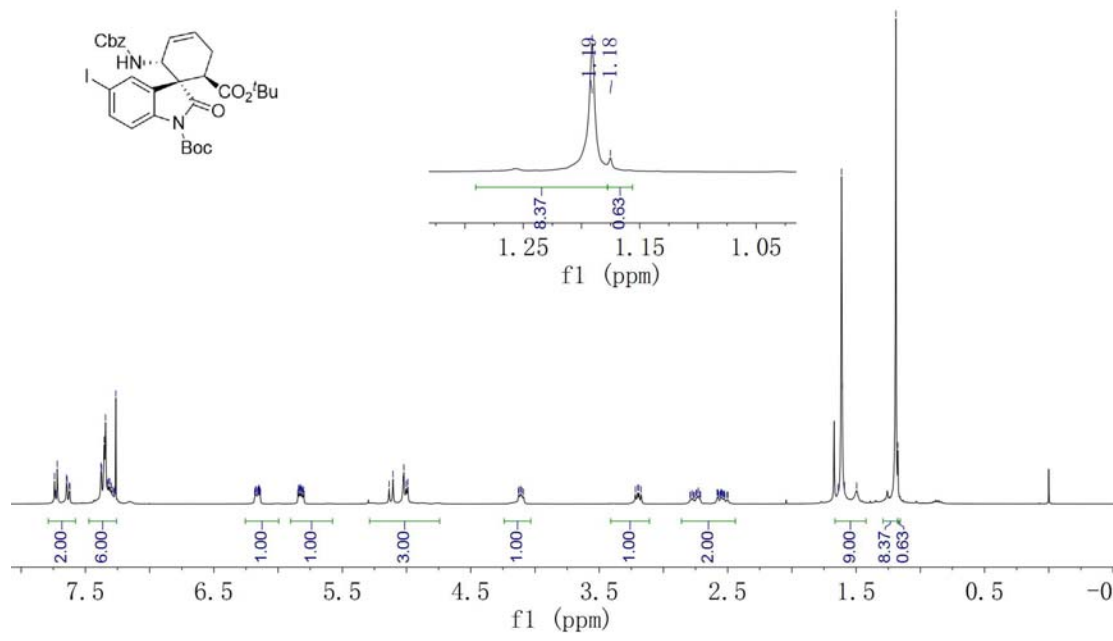

zhong-20160711134116  
 13C NMR CDCl<sub>3</sub> (4): 87.30, 84.01, 82.14, 67.01, 51.54, 51.05, 41.22, 28.12, 27.57, 25.45

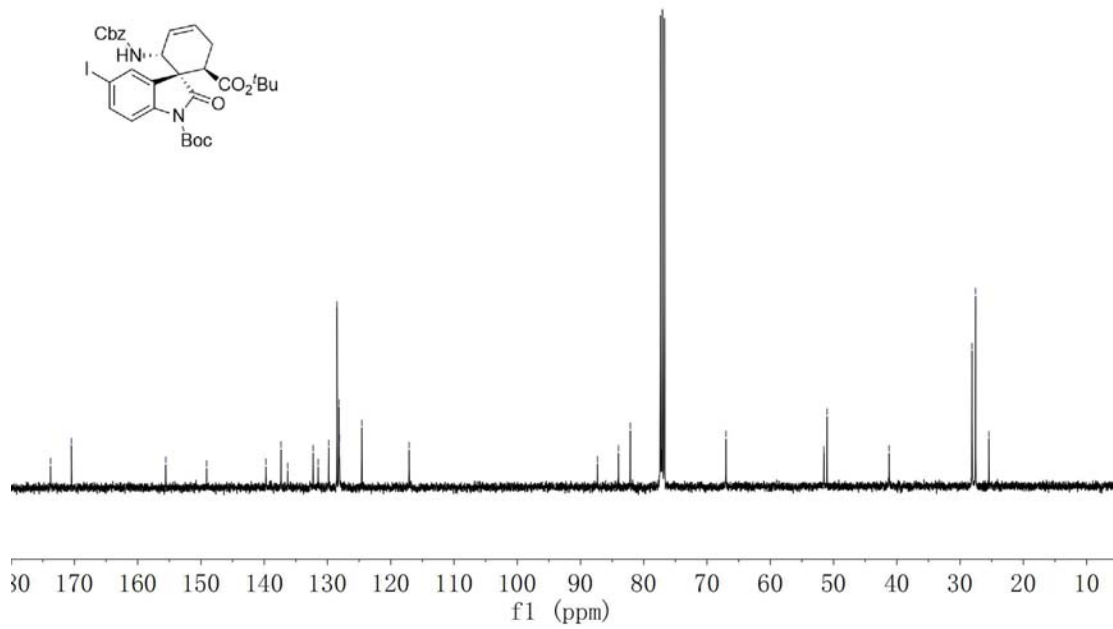

31

zhong-20160707-5, 6-21  
 PROTON CDCl3 (D) data: zhong-37

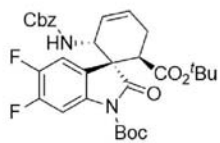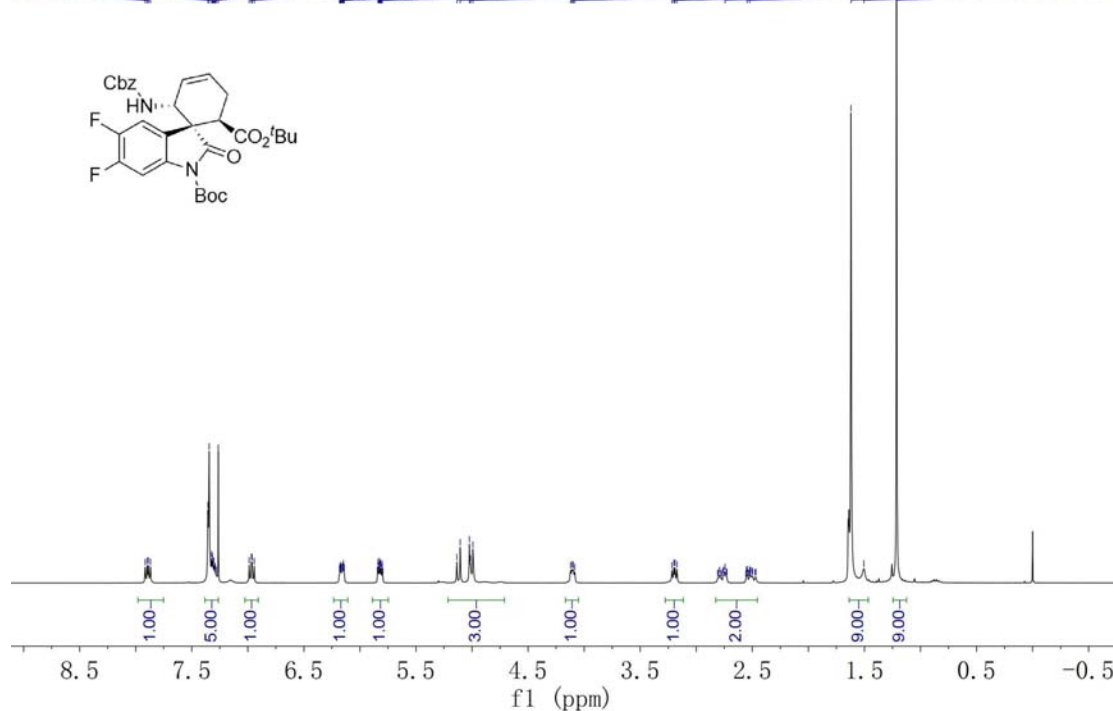

zhong-20160707-5, 6-21  
 C13 CDCl3 (D) data: zhong-37

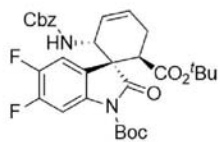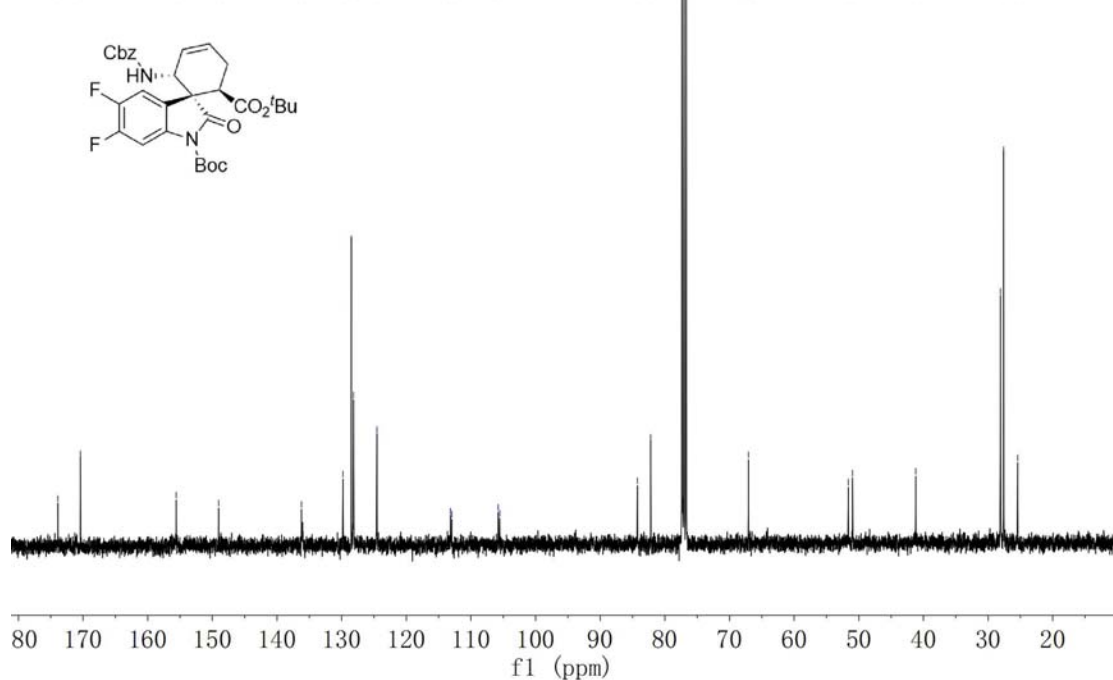

### 3m

zhoyi-20160707-546  
 PROTON CDCl<sub>3</sub> (D) Adal- zhoyi-38

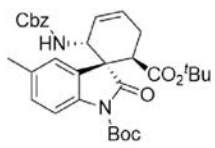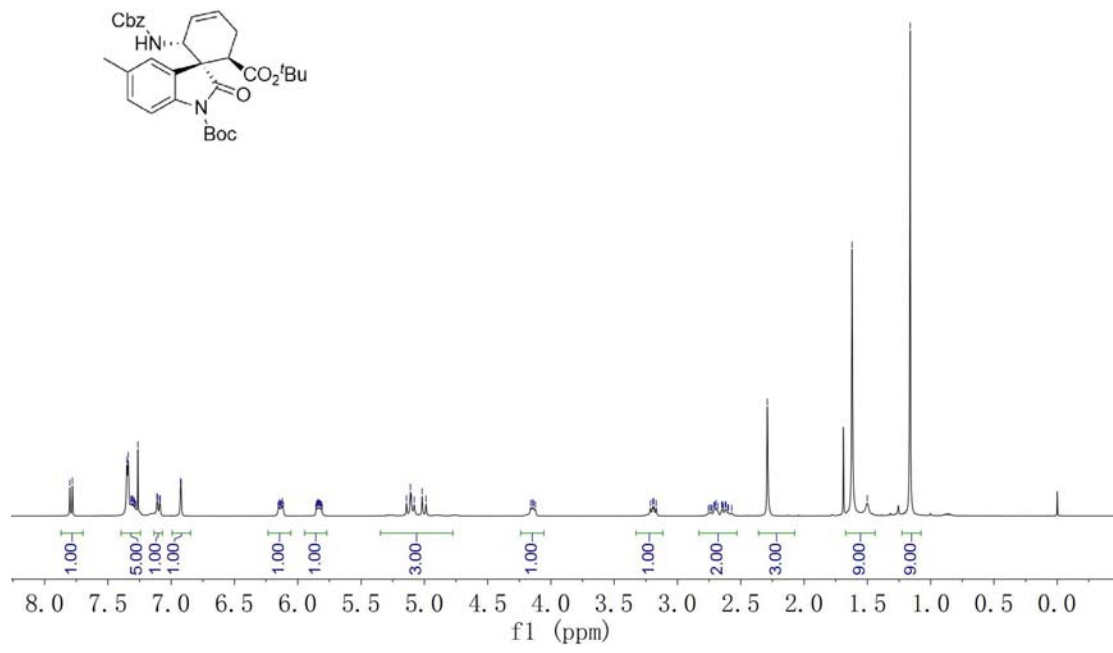

zhoyi-20160707-546  
 C13 CDCl<sub>3</sub> (D) Adal- zhoyi-38

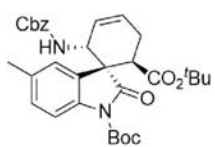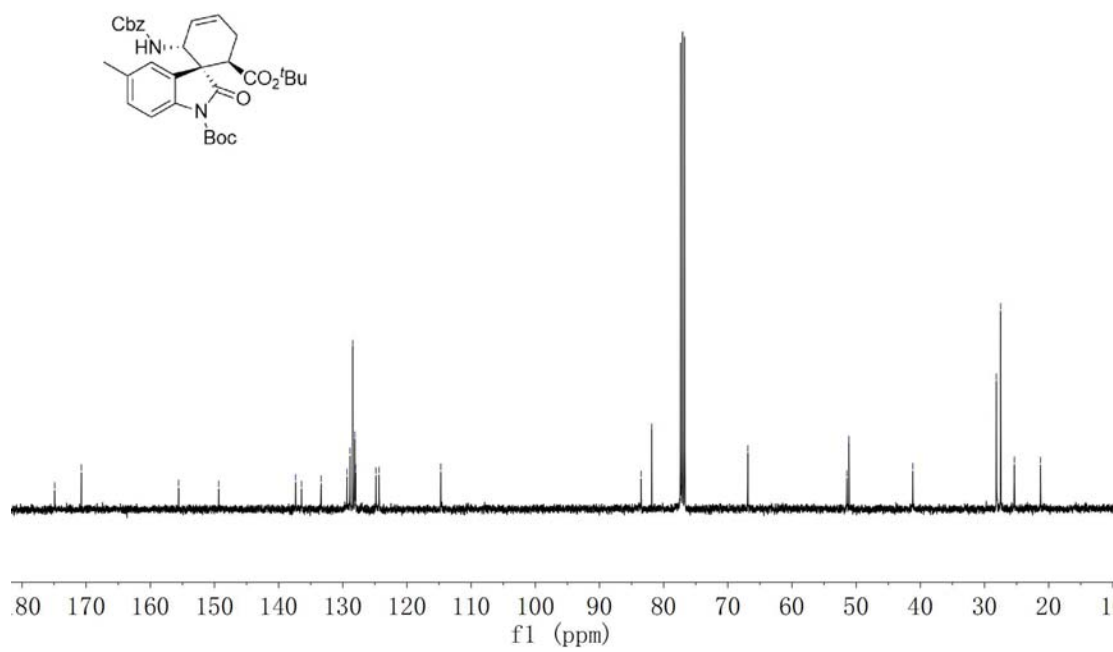



30

zhouyi 20160708 11:12 06  
 PROTON (CDCl<sub>3</sub>) (4): Adatol-ZhobvH-38

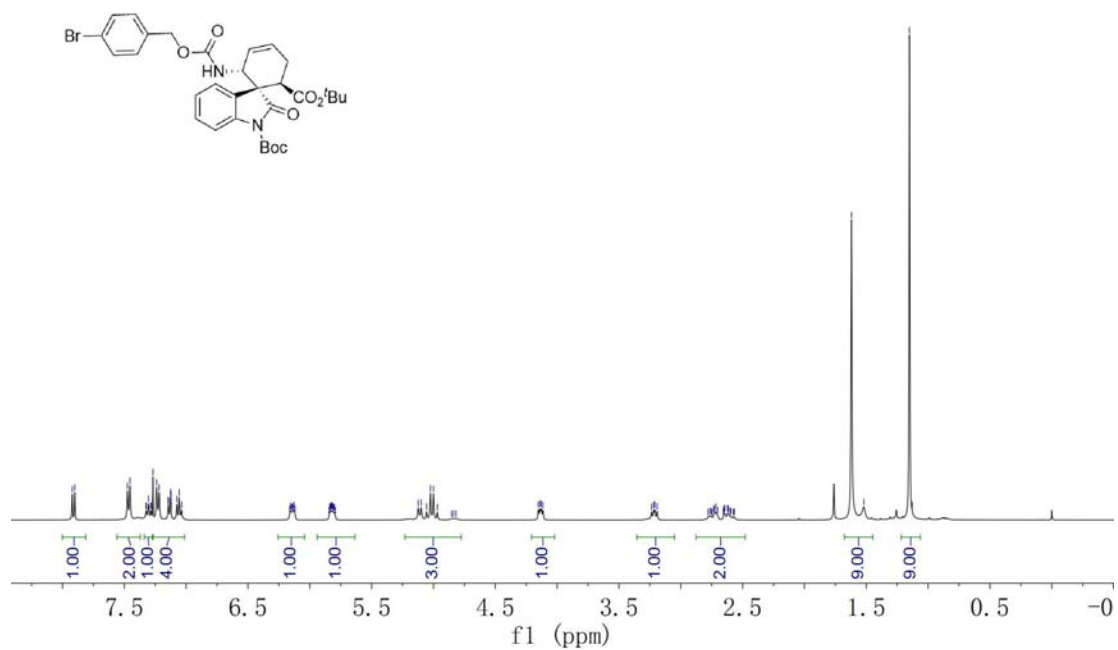

zhouyi 20160708 11:12 06  
 C13 (CDCl<sub>3</sub>) (4): Adatol-ZhobvH-38

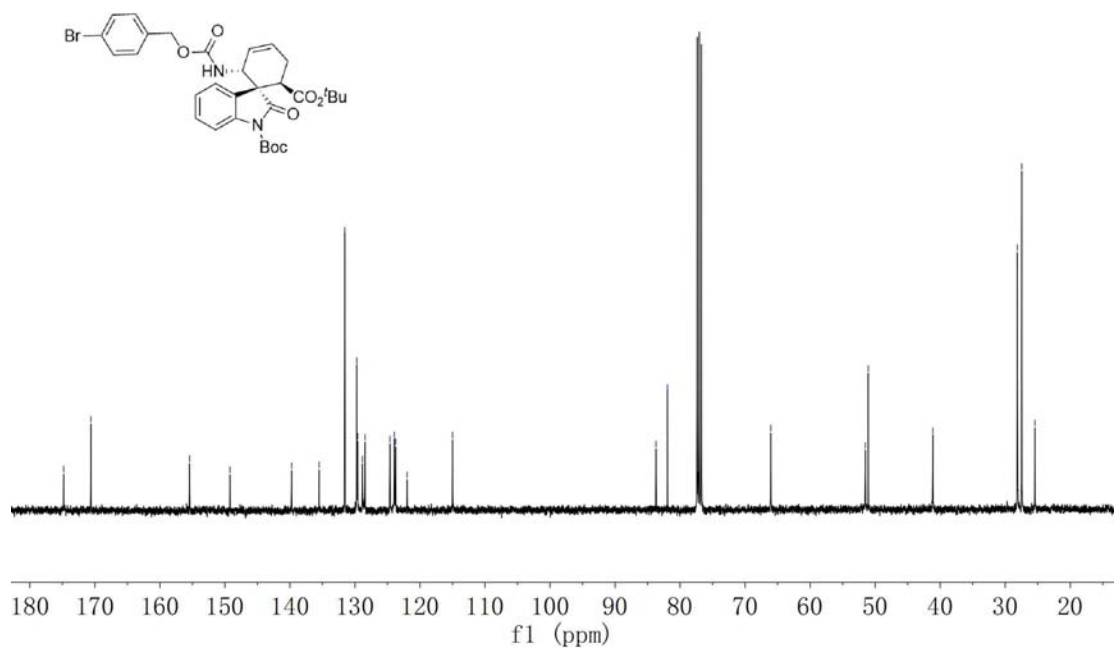

3p

zhouh-20160708-NH-ACF3-2.4.11  
 PROTON CDC13 (DMSO-d6) 39

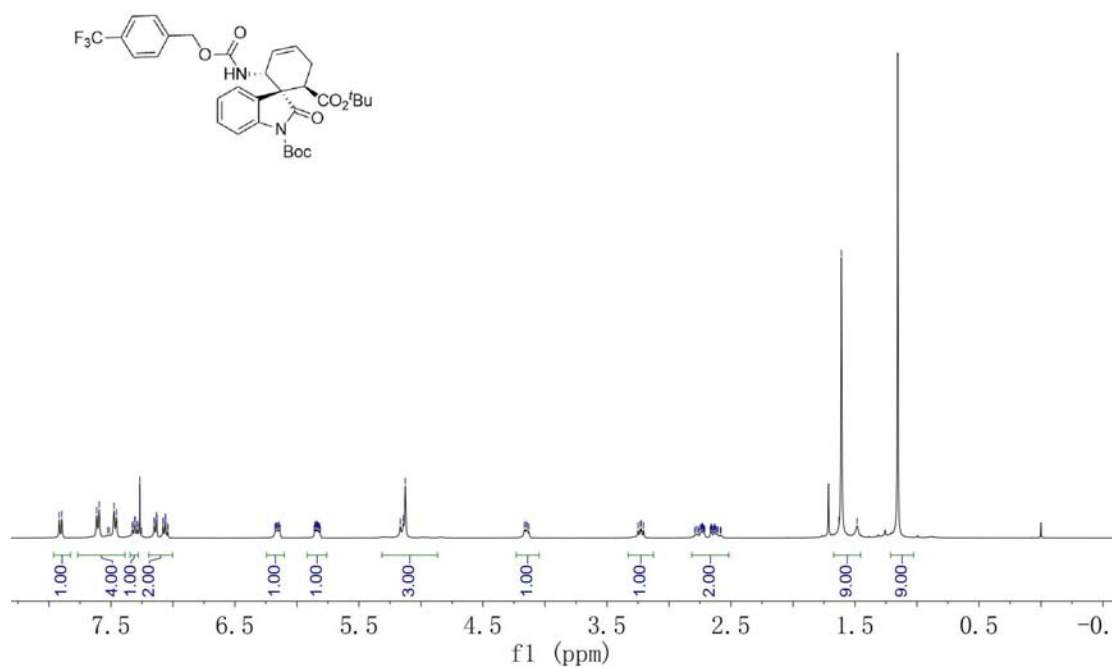

zhouh-20160708-NH-ACF3-2.4.11  
 CDCl3 (DMSO-d6) 39

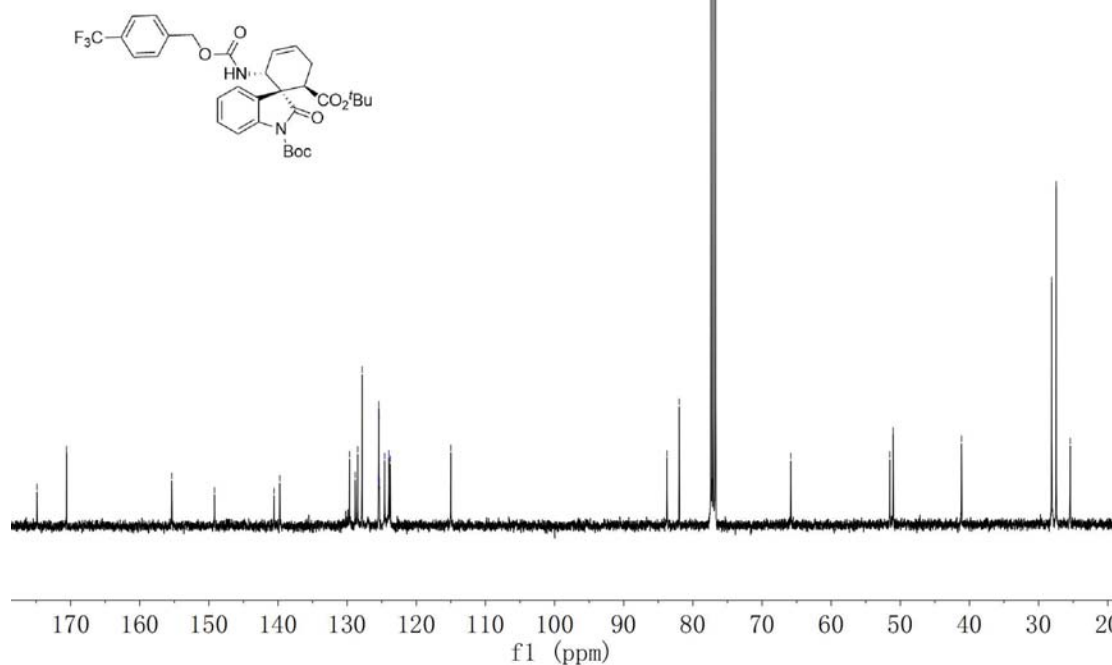

### 3q

zhouh-20160708-30Mg-12  
 PROTON CDCl<sub>3</sub> (D) Data: zhouh-12

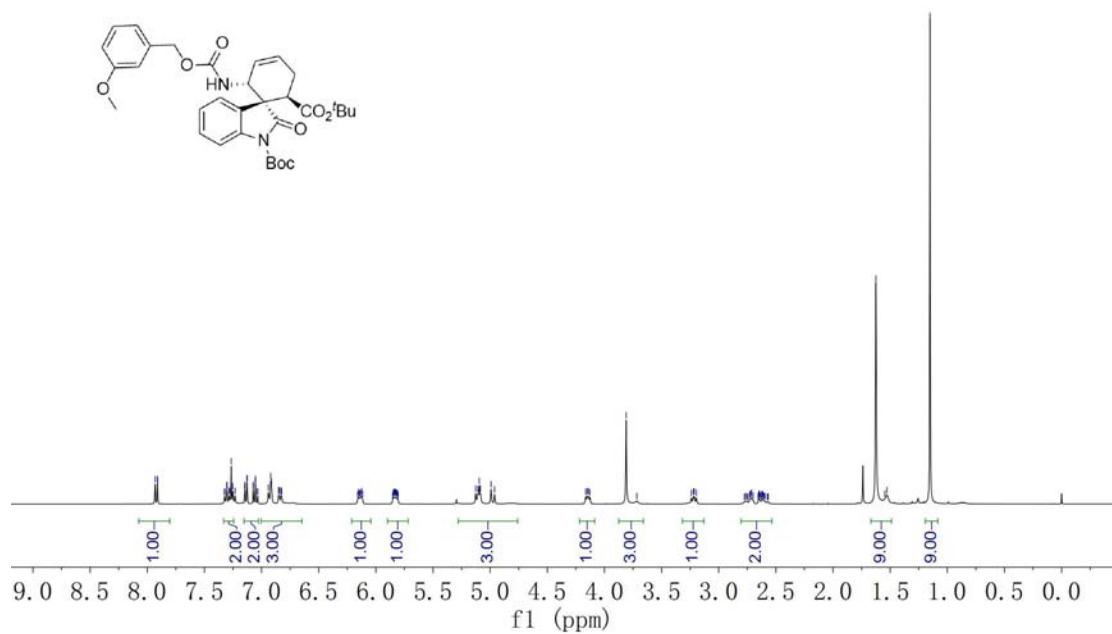

zhouh-20160708-30Mg-12  
 CDCl<sub>3</sub> (D) Data: zhouh-12

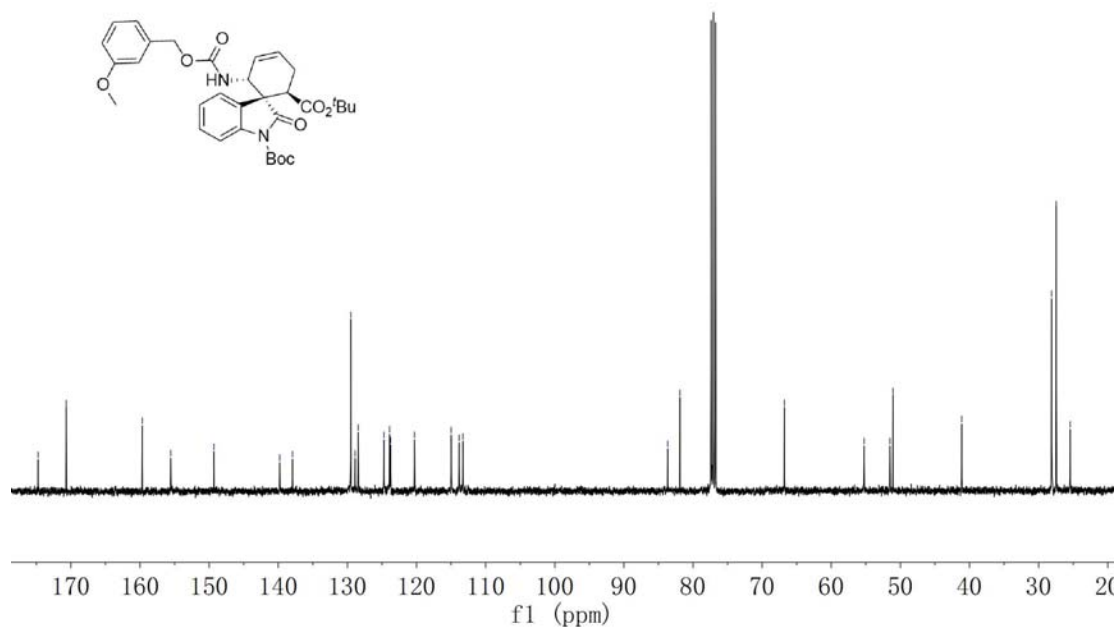







3s

zhouh-20160709-16  
 PROTON CDCl<sub>3</sub> (D): Adat: Zhouh-16

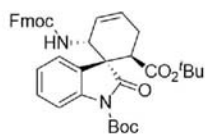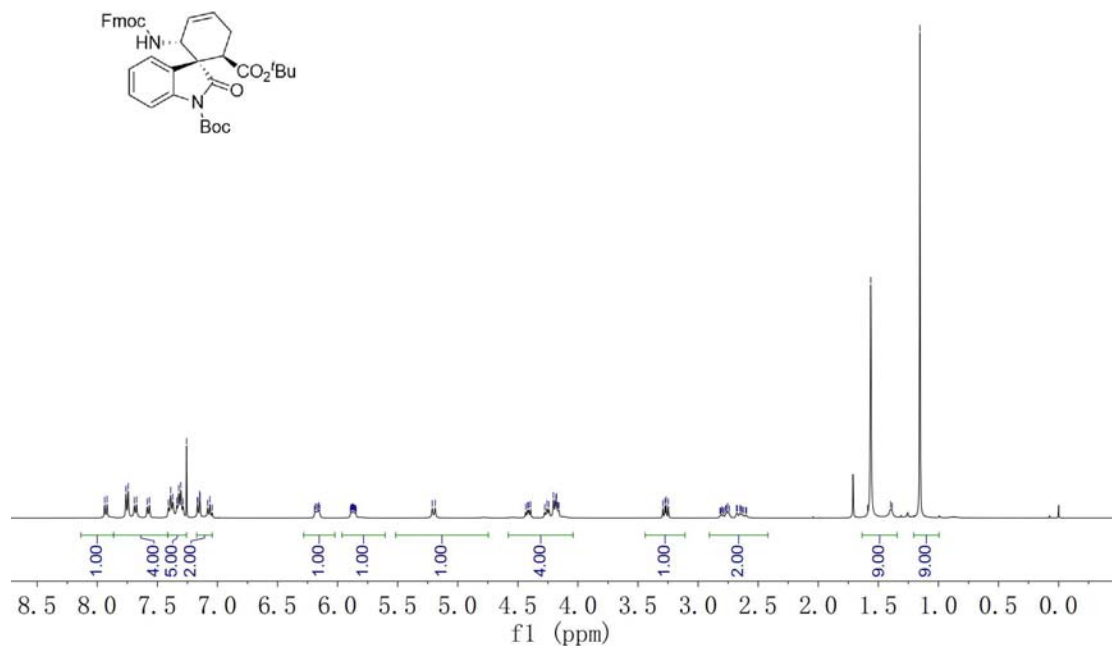

zhouh-20160709-16  
 CDCl<sub>3</sub> (D): Adat: Zhouh-16

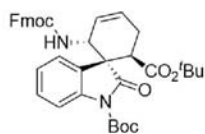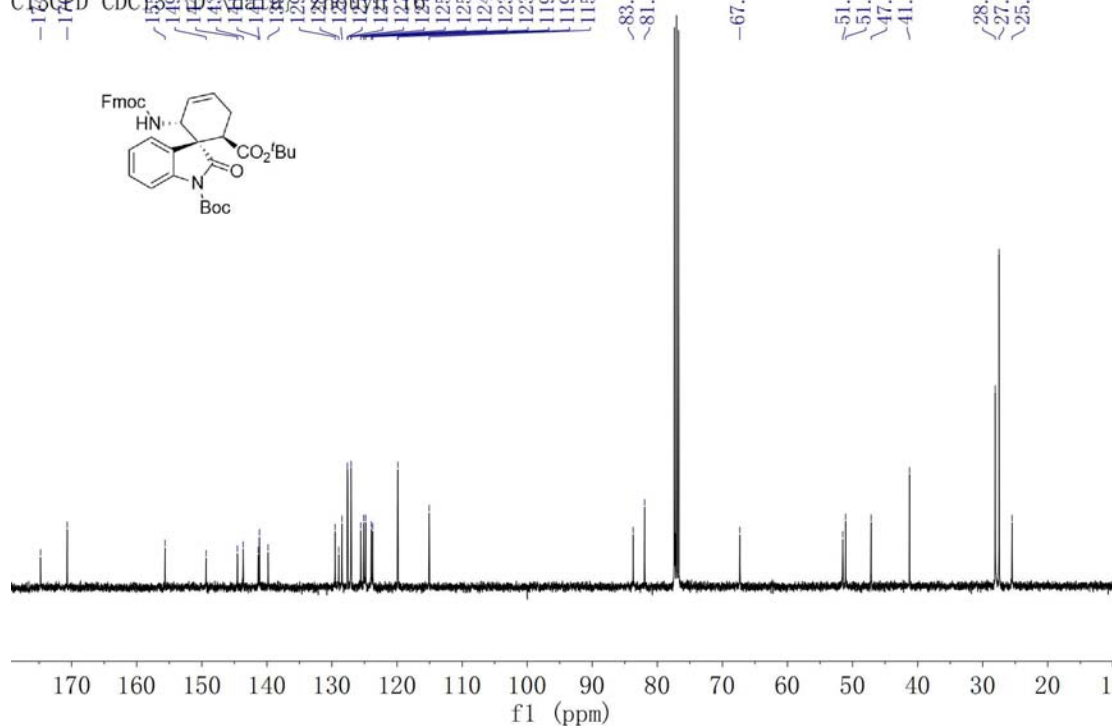



**3u**

zhongyao-20160714-1113-24-30  
 PROTON CDCl<sub>3</sub> (H): 7.28, 7.27, 7.26, 7.14, 7.14, 7.12, 7.12, 7.09, 7.09, 7.07, 7.07, 7.06, 7.05, 6.16, 6.14, 5.82, 5.82, 5.81, 5.80, 5.79, 5.45, 5.05, 5.02, 4.99, 4.90, 4.87, 4.16, 4.15, 3.28, 3.26, 3.25, 3.23, 1.10

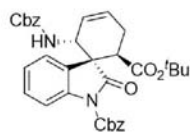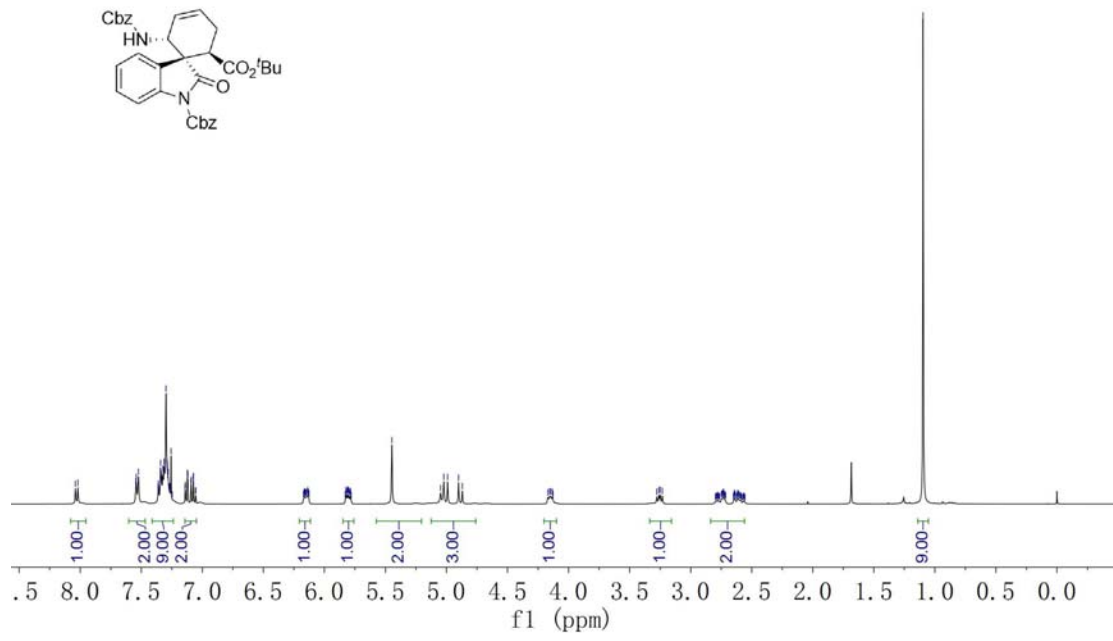

zhongyao-20160714-1113-24-30  
 C13 CP CDCl<sub>3</sub> (D): 155.26, 154.61, 153.46, 153.30, 129.92, 128.64, 128.13, 127.99, 127.80, 124.50, 124.28, 123.69, 115.23, -82.00, -68.22, -66.96, -51.73, -51.28, -41.12, -27.45, -25.50

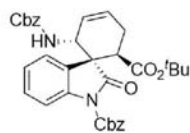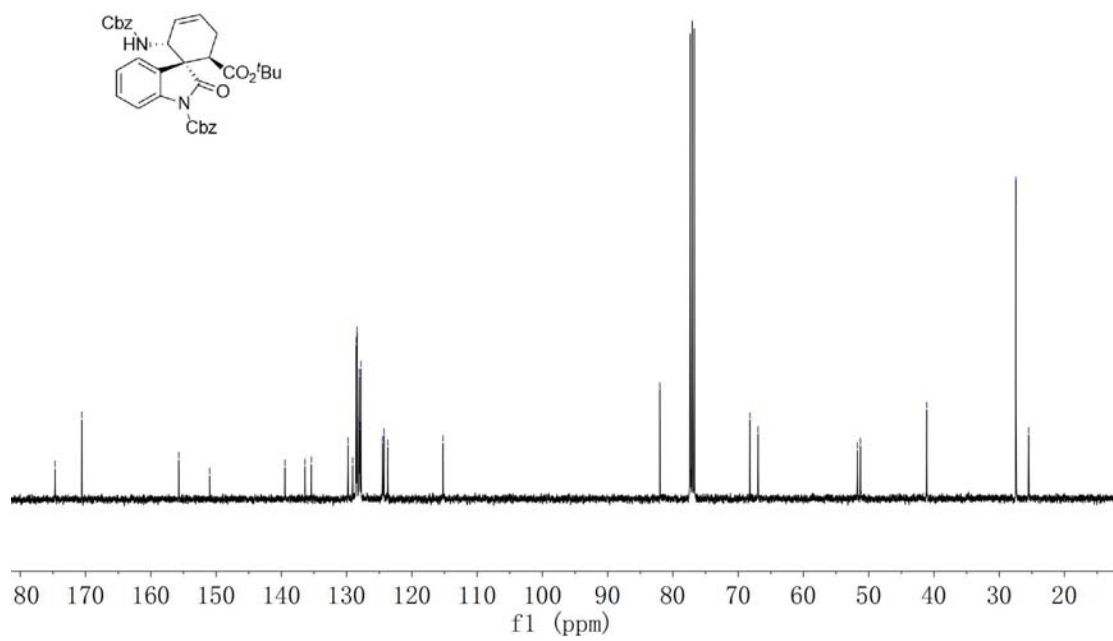

5a

zhouyh-20160712-By 41411407  
 PROTON CDCl<sub>3</sub> (D: NaCl) zhouyh-50

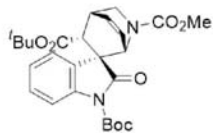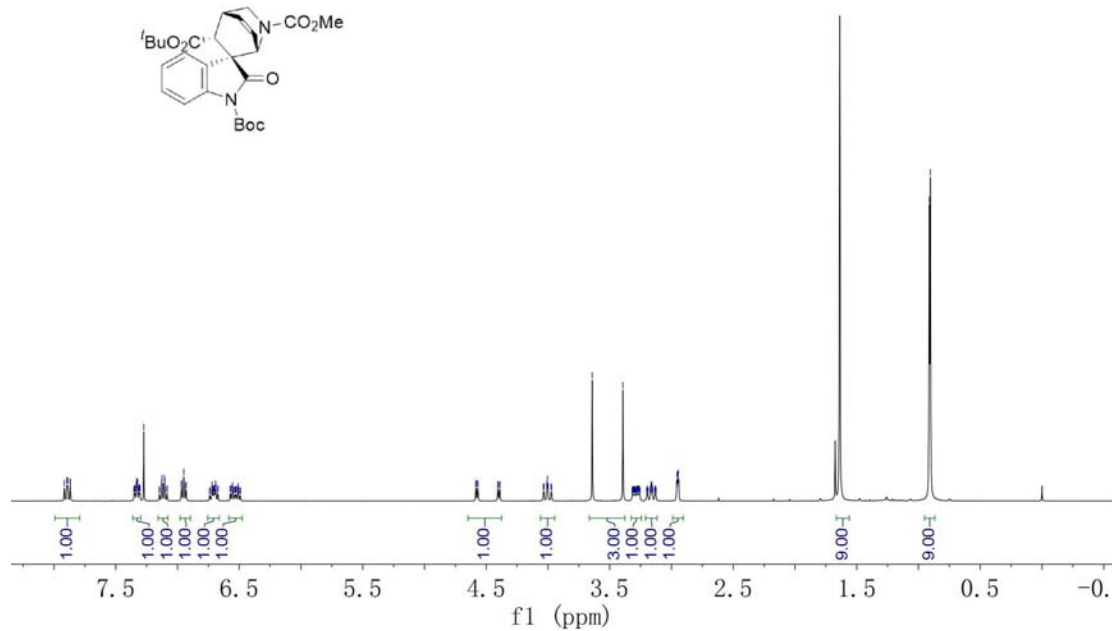

zhouyh-20160712-By 41411407  
 C13CPD CDCl<sub>3</sub> (D: NaCl) zhouyh-50

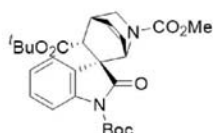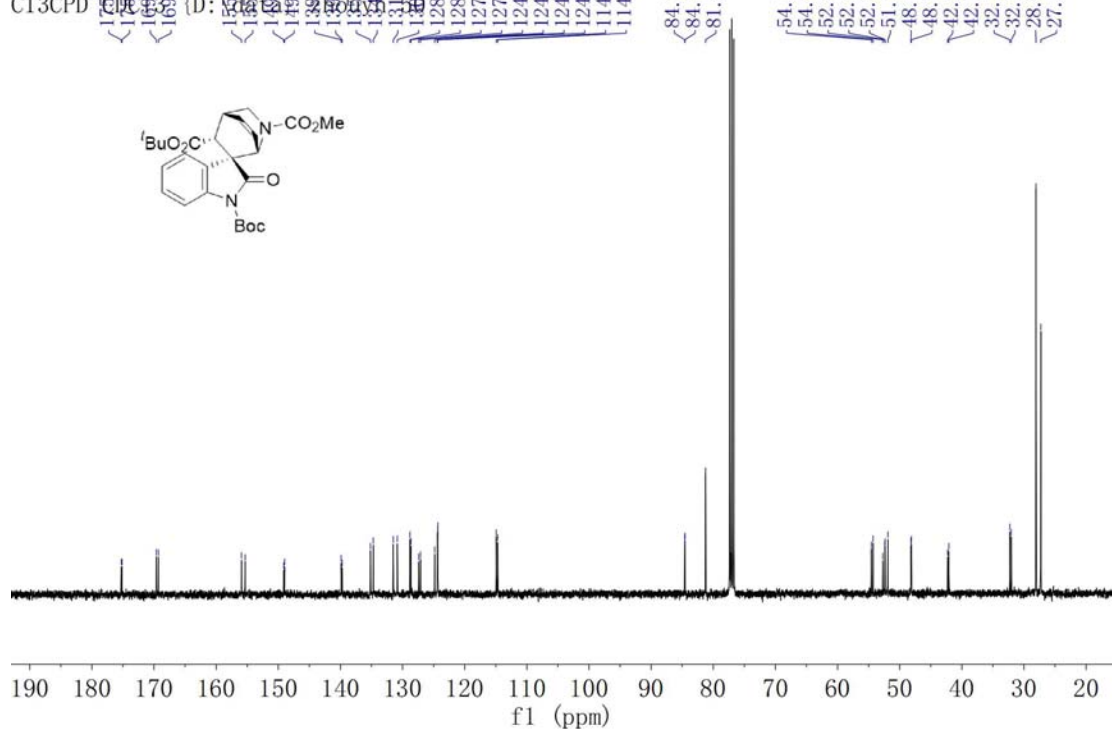

5b

20160712 Py 19 06 57  
 PROTON CDCl<sub>3</sub> (D) Adat-766v5-06

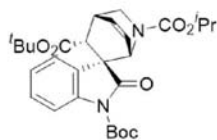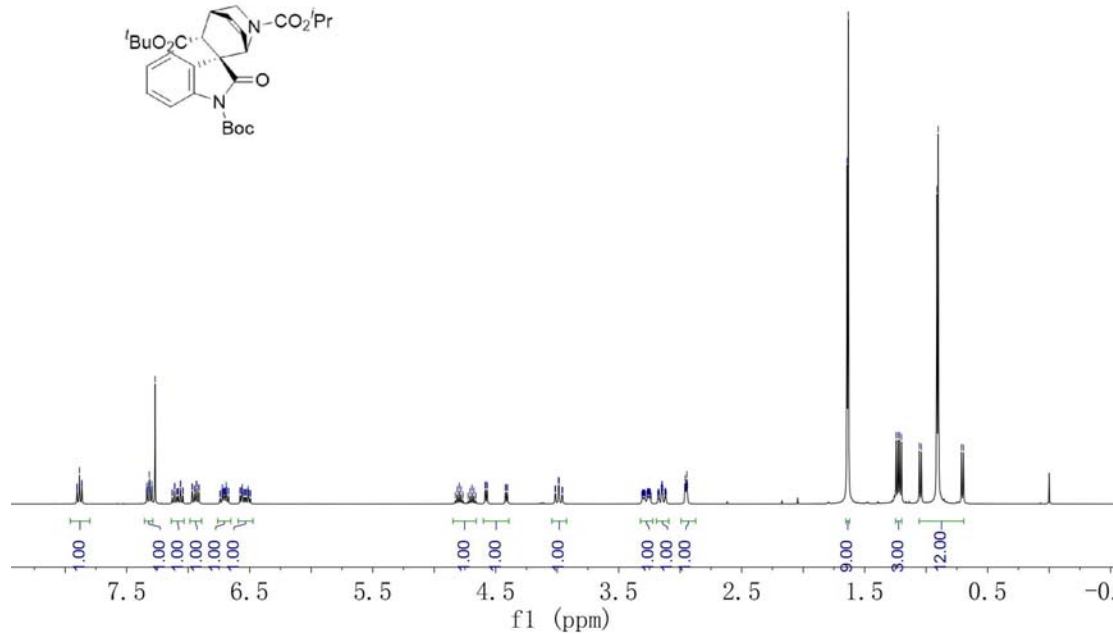

20160712 Py 19 26 27  
 CDCl<sub>3</sub> (D) Adat-766v5-06

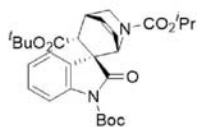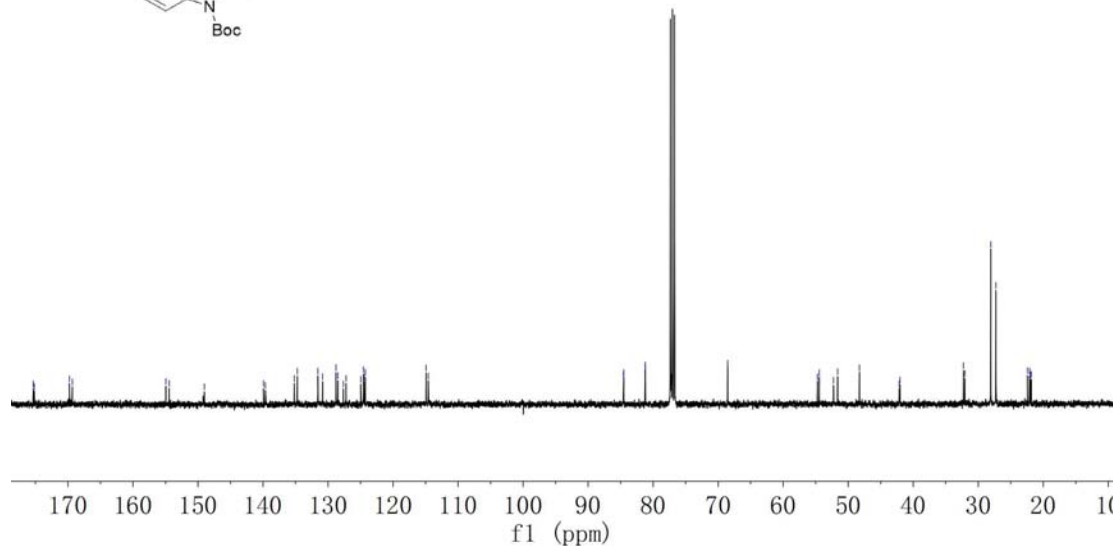



5d

20160716 13C NMR 4.08 3.99 3.94 3.88 3.83 3.78 3.73 3.68 3.63 3.58 3.53 3.48 3.43 3.38 3.33 3.28 3.23 3.18 3.13 3.08 3.03 2.98 2.93 2.88 2.83 2.78 2.73 2.68 2.63 2.58 2.53 2.48 2.43 2.38 2.33 2.28 2.23 2.18 2.13 2.08 2.03 1.98 1.93 1.88 1.83 1.78 1.73 1.68 1.63 1.58 1.53 1.48 1.43 1.38 1.33 1.28 1.23 1.18 1.13 1.08 1.03 0.98 0.93 0.88 0.83 0.78 0.73 0.68 0.63 0.58 0.53 0.48 0.43 0.38 0.33 0.28 0.23 0.18 0.13 0.08 0.03 0.00

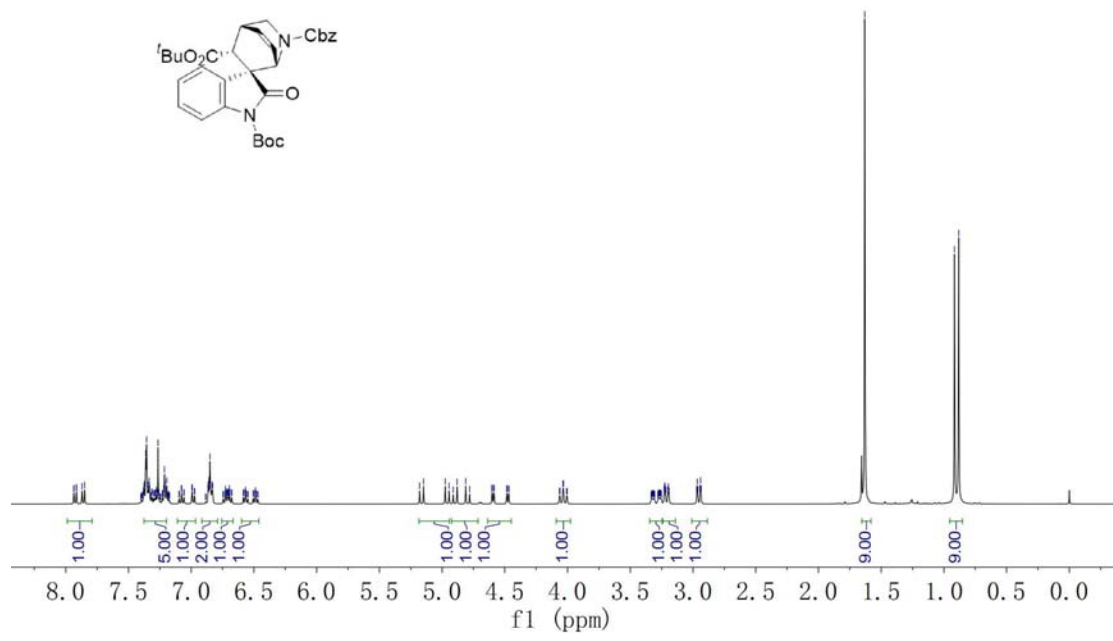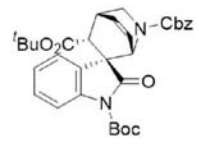

20160716 13C NMR 136.23 135.71 135.19 134.67 134.15 133.63 133.11 132.59 132.07 131.55 131.03 130.51 129.99 129.47 128.95 128.43 127.91 127.39 126.87 126.35 125.83 125.31 124.79 124.27 123.75 123.23 122.71 122.19 121.67 121.15 120.63 120.11 119.59 119.07 118.55 118.03 117.51 116.99 116.47 115.95 115.43 114.91 114.39 113.87 113.35 112.83 112.31 111.79 111.27 110.75 110.23 109.71 109.19 108.67 108.15 107.63 107.11 106.59 106.07 105.55 105.03 104.51 103.99 103.47 102.95 102.43 101.91 101.39 100.87 100.35 99.83 99.31 98.79 98.27 97.75 97.23 96.71 96.19 95.67 95.15 94.63 94.11 93.59 93.07 92.55 92.03 91.51 90.99 90.47 89.95 89.43 88.91 88.39 87.87 87.35 86.83 86.31 85.79 85.27 84.75 84.23 83.71 83.19 82.67 82.15 81.63 81.11 80.59 80.07 79.55 79.03 78.51 77.99 77.47 76.95 76.43 75.91 75.39 74.87 74.35 73.83 73.31 72.79 72.27 71.75 71.23 70.71 70.19 70.00 69.67 69.34 69.01 68.68 68.35 68.02 67.69 67.36 67.03 66.70 66.37 66.04 65.71 65.38 65.05 64.72 64.39 64.06 63.73 63.40 63.07 62.74 62.41 62.08 61.75 61.42 61.09 60.76 60.43 60.10 59.77 59.44 59.11 58.78 58.45 58.12 57.79 57.46 57.13 56.80 56.47 56.14 55.81 55.48 55.15 54.82 54.49 54.16 53.83 53.50 53.17 52.84 52.51 52.18 51.85 51.52 51.19 50.86 50.53 50.20 49.87 49.54 49.21 48.88 48.55 48.22 47.89 47.56 47.23 46.90 46.57 46.24 45.91 45.58 45.25 44.92 44.59 44.26 43.93 43.60 43.27 42.94 42.61 42.28 41.95 41.62 41.29 40.96 40.63 40.30 39.97 39.64 39.31 38.98 38.65 38.32 37.99 37.66 37.33 37.00 36.67 36.34 36.01 35.68 35.35 35.02 34.69 34.36 34.03 33.70 33.37 33.04 32.71 32.38 32.05 31.72 31.39 31.06 30.73 30.40 30.07 29.74 29.41 29.08 28.75 28.42 28.09 27.76 27.43 27.10 26.77 26.44 26.11 25.78 25.45 25.12 24.79 24.46 24.13 23.80 23.47 23.14 22.81 22.48 22.15 21.82 21.49 21.16 20.83 20.50 20.17 19.84 19.51 19.18 18.85 18.52 18.19 17.86 17.53 17.20 16.87 16.54 16.21 15.88 15.55 15.22 14.89 14.56 14.23 13.90 13.57 13.24 12.91 12.58 12.25 11.92 11.59 11.26 10.93 10.60 10.27 9.94 9.61 9.28 8.95 8.62 8.29 7.96 7.63 7.30 6.97 6.64 6.31 5.98 5.65 5.32 5.00 4.67 4.34 4.01 3.68 3.35 3.02 2.69 2.36 2.03 1.70 1.37 1.04 0.71 0.38 0.05 0.00

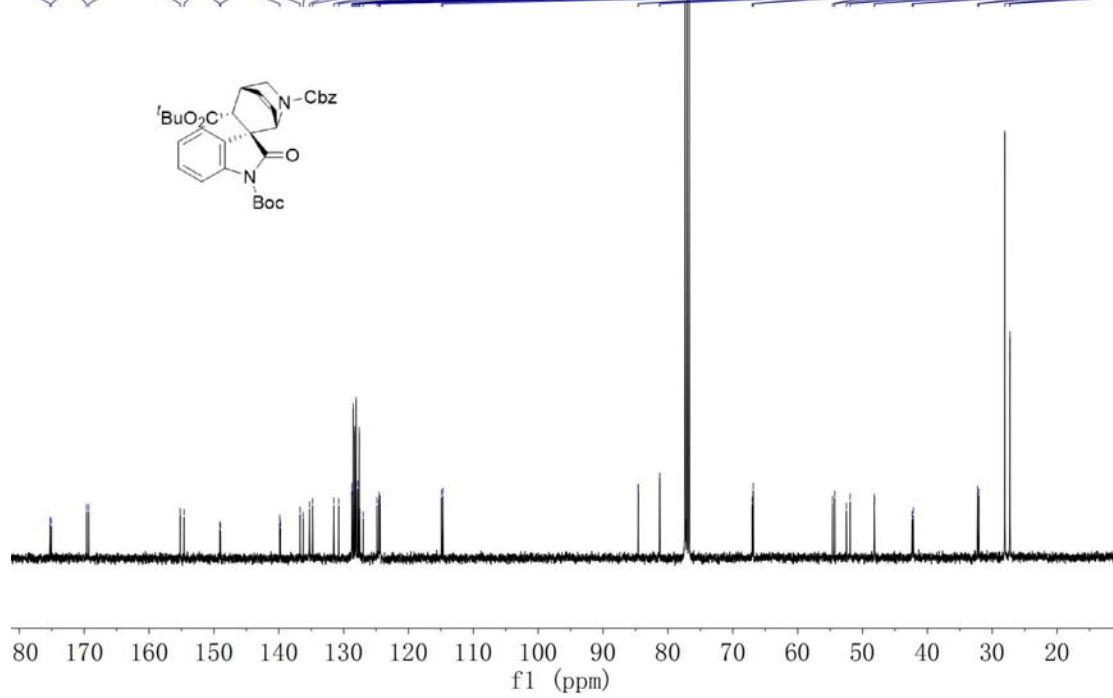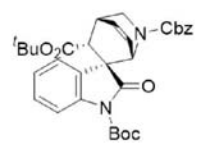



5e

zhuo et al 20160712 12:41:23 2019  
 PROTON CDCl3 (f1): 7.54, 7.51, 7.49, 7.47, 7.45, 7.43, 7.41, 7.39, 7.37, 7.35, 7.33, 7.31, 7.29, 7.27, 7.25, 7.23, 7.21, 7.19, 7.17, 7.16, 7.14, 7.12, 7.10, 7.08, 7.06, 7.04, 7.02, 6.80, 6.65, 6.63, 6.63, 6.63, 6.62, 6.62, 6.61, 6.60, 4.66, 4.65, 4.65, 3.38, 3.38, 3.37, 3.36, 3.03, 3.00, 1.64, 0.93

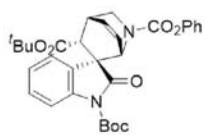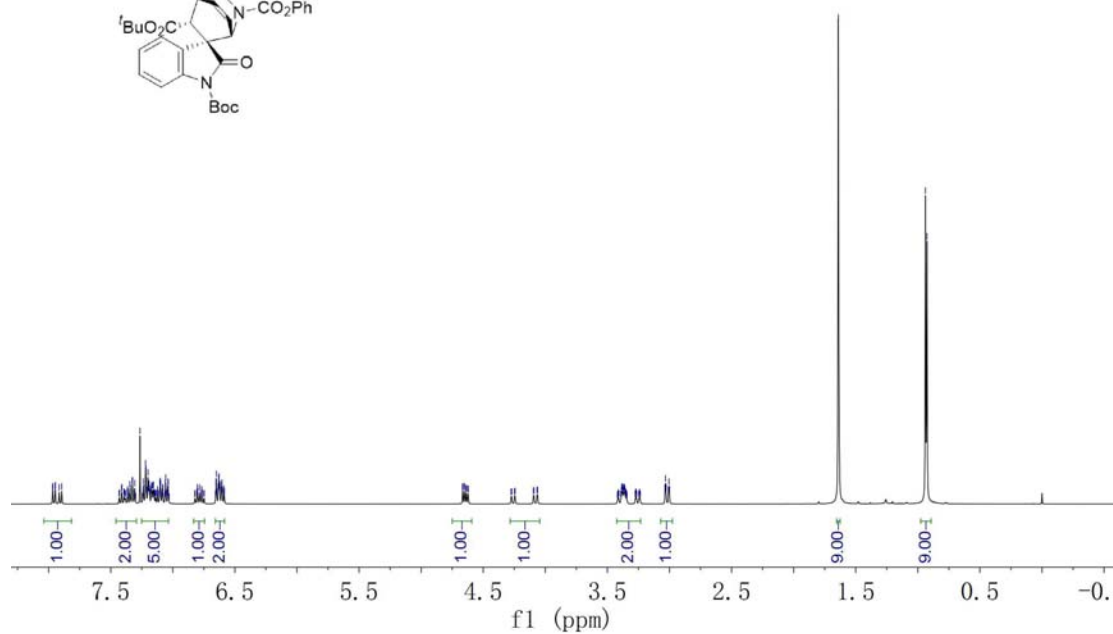

zhuo et al 20160712 12:41:23 2019  
 C13 (CDCl3) (f1): 132.96, 132.91, 132.86, 132.81, 132.76, 132.71, 132.66, 132.61, 132.56, 132.51, 132.46, 132.41, 132.36, 132.31, 132.26, 132.21, 132.16, 132.11, 132.06, 128.90, 127.52, 127.05, 125.39, 125.30, 124.89, 124.39, 121.72, 121.52, 115.13, 115.00, 84.73, 84.66, 81.41, 54.71, 54.24, 53.01, 52.08, 48.15, 48.05, 42.66, 42.58, 32.32, 32.00, 28.07, 27.33

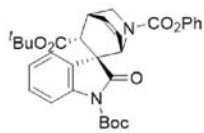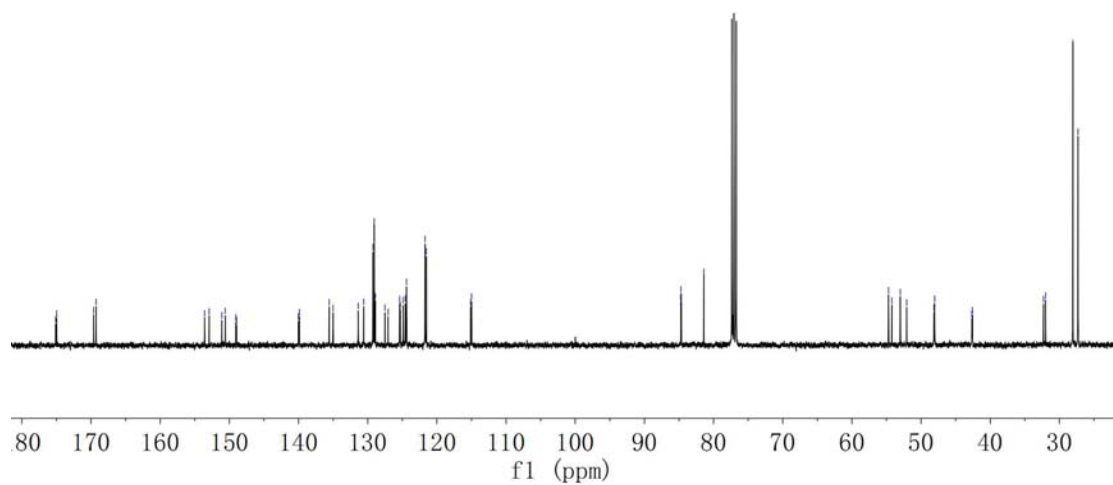









5i

20160712 12:40 32.1  
 21  
 19  
 19  
 18  
 16  
 16  
 10  
 05  
 04  
 04  
 03  
 02  
 02  
 64  
 63  
 62  
 61  
 61  
 60  
 59  
 57  
 70  
 70  
 66  
 65  
 15  
 14  
 12  
 98  
 94  
 66  
 65  
 91  
 90

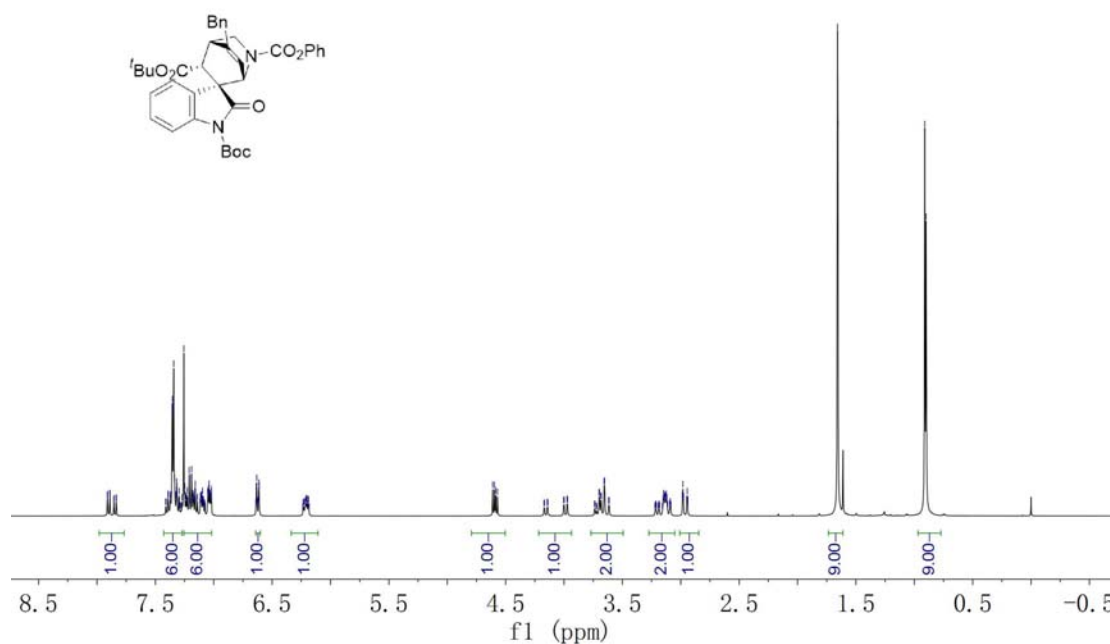

20160712 12:40 32.1  
 21  
 19  
 19  
 18  
 16  
 16  
 10  
 05  
 04  
 04  
 03  
 02  
 02  
 64  
 63  
 62  
 61  
 61  
 60  
 59  
 57  
 70  
 70  
 66  
 65  
 15  
 14  
 12  
 98  
 94  
 66  
 65  
 91  
 90

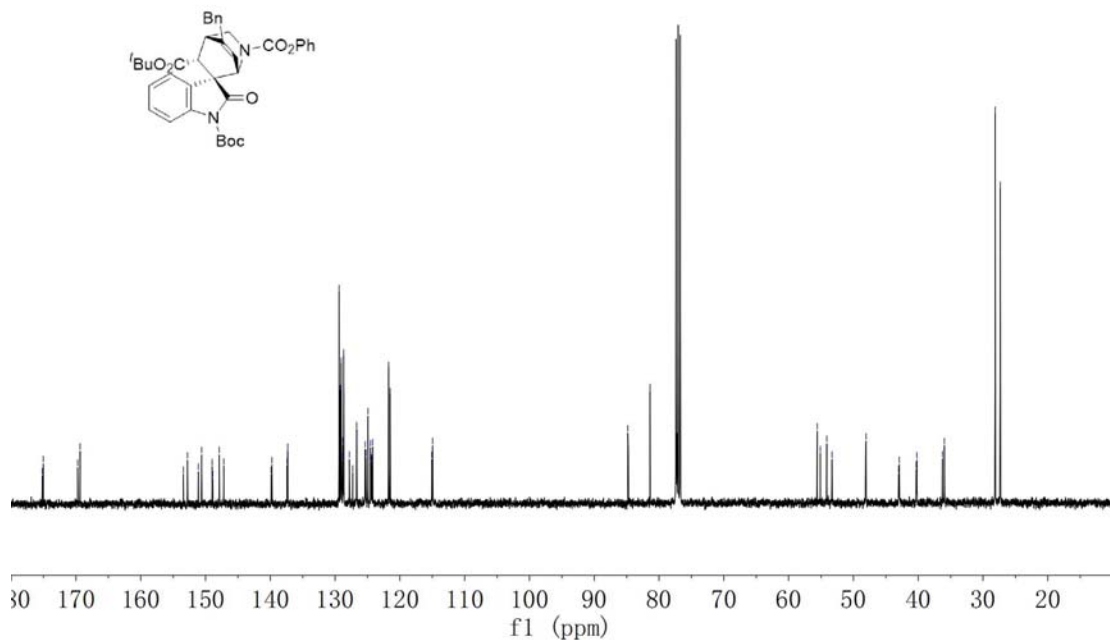



6a

zhouyi 20160725-zhouyi-yu 11-09-07  
 PROTON CDCl3 (D):data-zhouyi-15

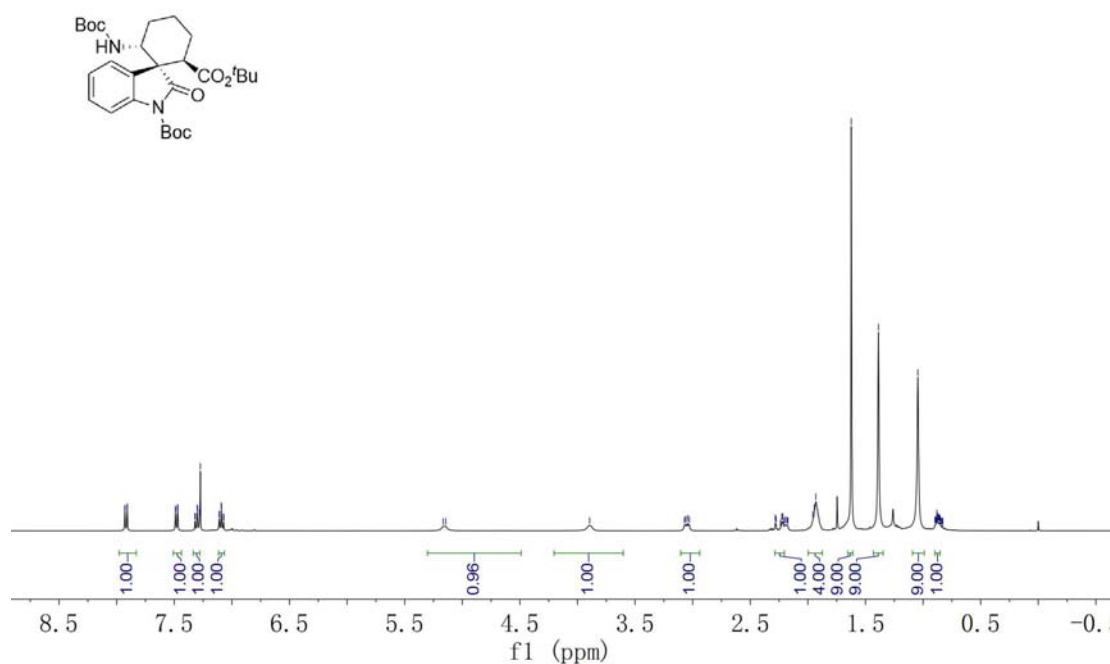

zhouyi 20160725-zhouyi-yu 11-09-07  
 C13 CDCl3 (D):data-zhouyi-15

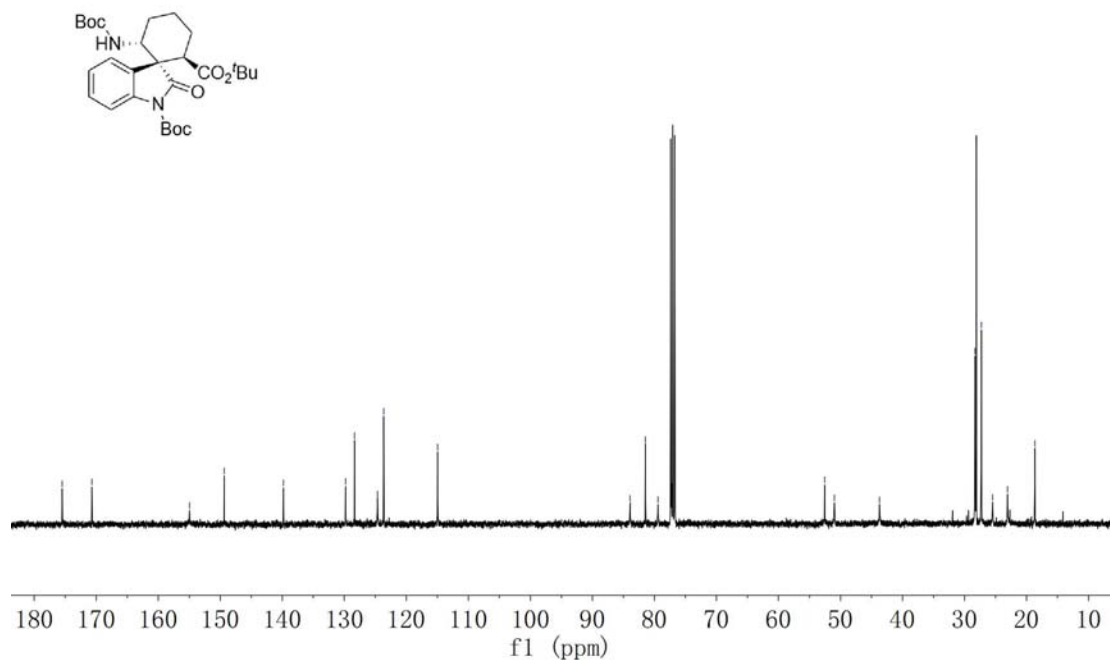

**6b**

zyh-20160916-6b-12914  
 PROTON CDCl<sub>3</sub> (Data) zyh-19

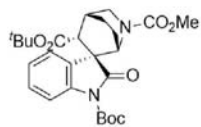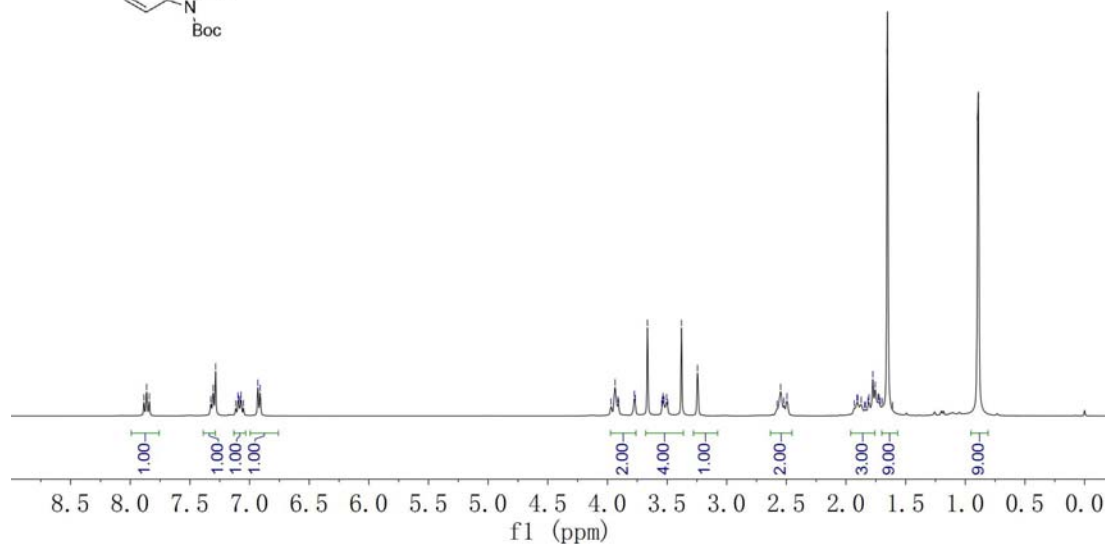

zyh-20160916-6b-12914  
 C13CPD CDCl<sub>3</sub> (Data) zyh-19

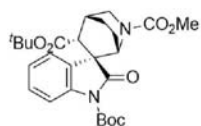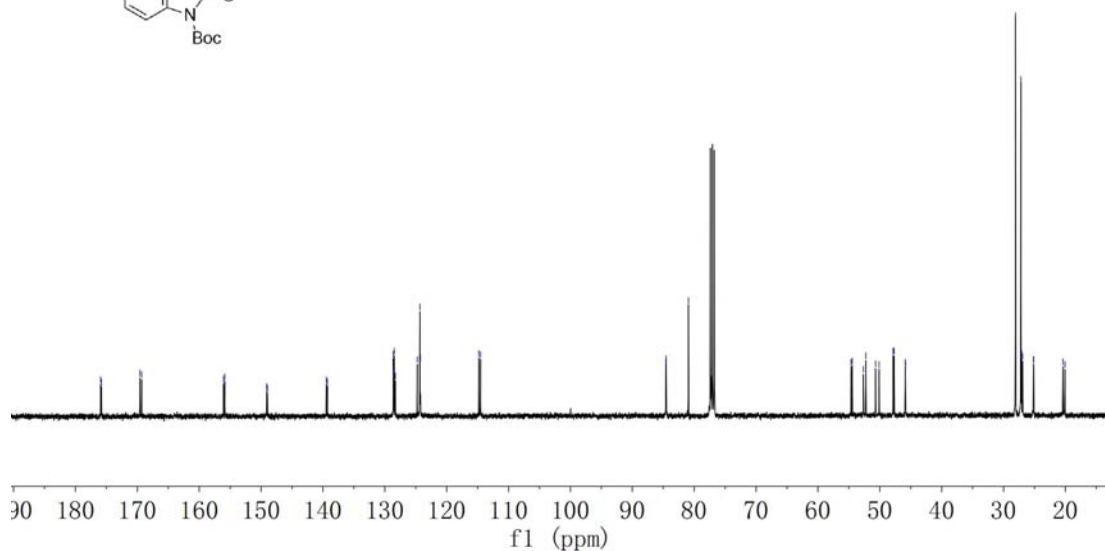







6d

zhouh-20160721-YS; 2. f1d  
 PROTON CDCl3 (D:\data\zhouh-20160721-YS; 2. f1d)

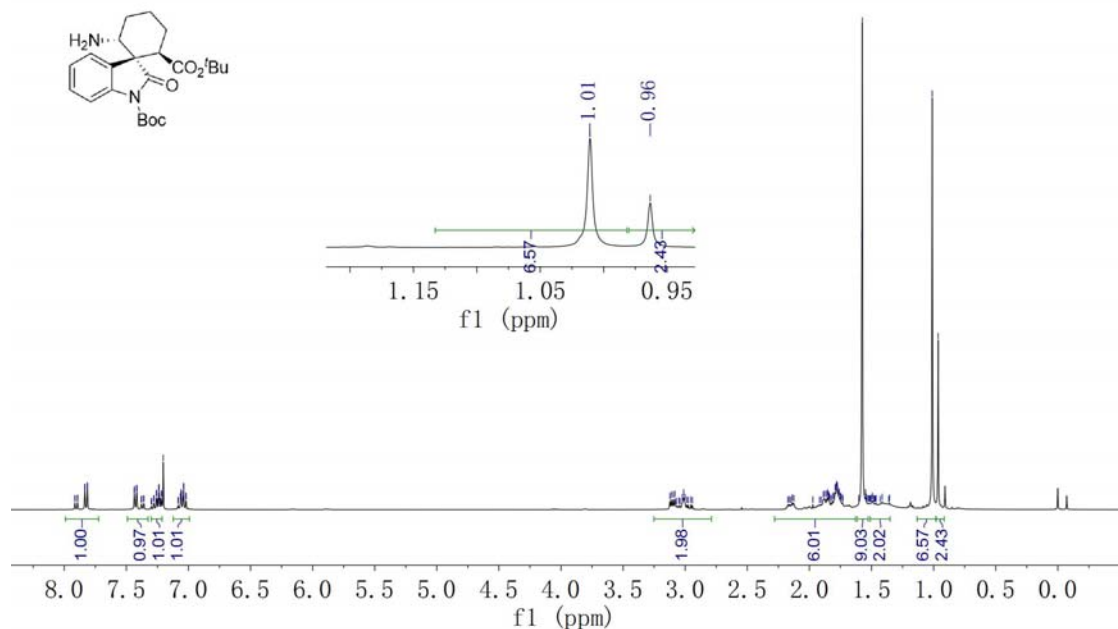

zhouh-20160721-YS; 2. f1d  
 C13CD CDCl3 (D:\data\zhouh-20160721-YS; 2. f1d)

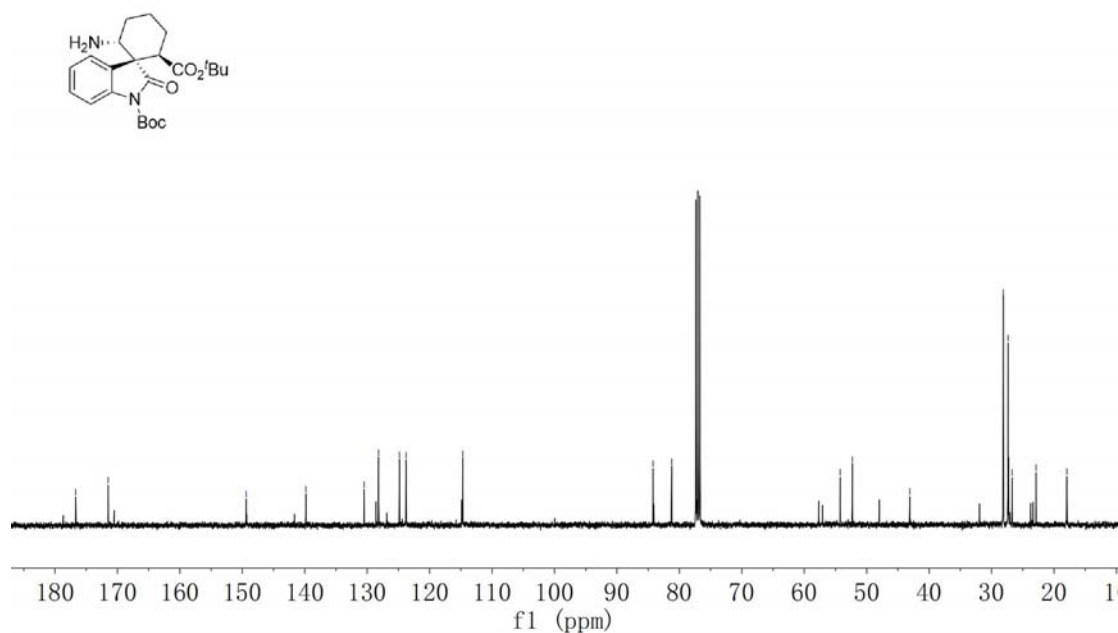

6e

zhouyh-20170107-5ddbf-8 f1  
 C13 CDCl3 (E) data zhouyh-56  
 PROTON CDCl3 (H) data zhouyh-56

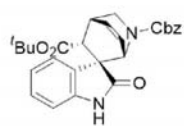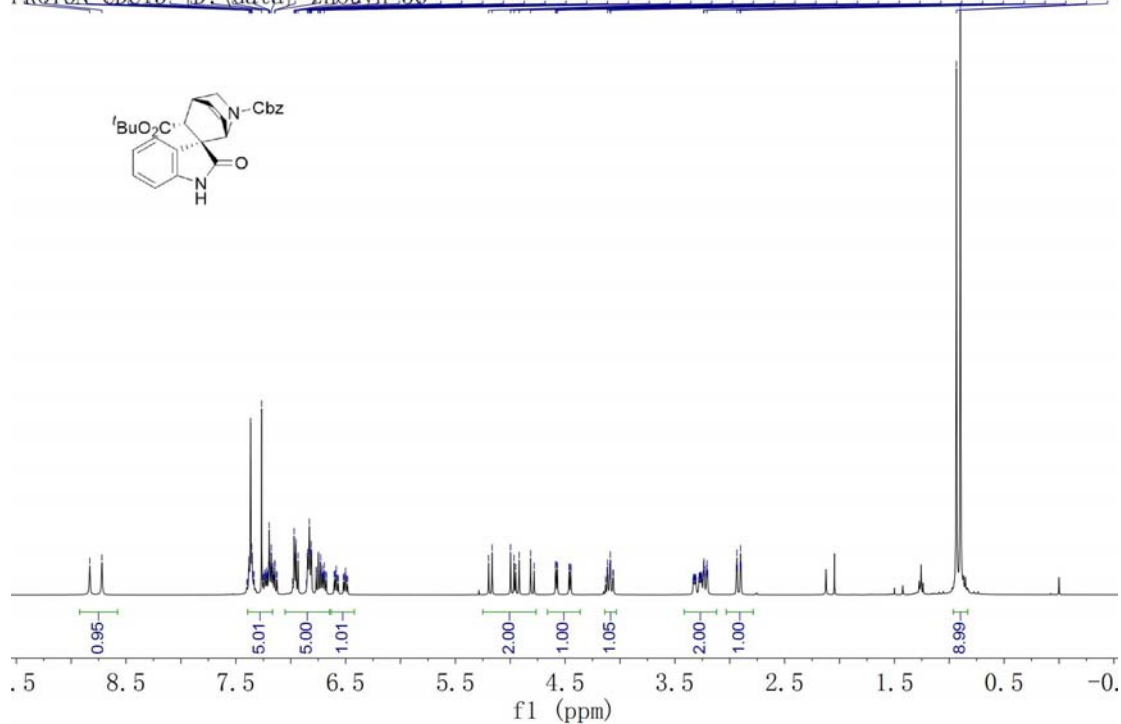

zhouyh-20170107-5ddbf-8 f1  
 C13 CDCl3 (E) data zhouyh-56  
 136.8  
 136.8  
 135.5  
 134.7  
 131.0  
 129.0  
 128.6  
 128.5  
 128.5  
 128.3  
 128.0  
 128.0  
 127.7  
 127.5  
 125.4  
 124.9  
 122.7  
 122.5  
 109.9  
 109.7  
 81.1  
 81.1  
 67.0  
 66.8  
 54.8  
 54.3  
 52.3  
 51.7  
 47.1  
 46.9  
 42.4  
 42.2  
 32.4  
 32.2  
 27.4  
 27.4

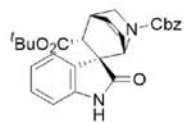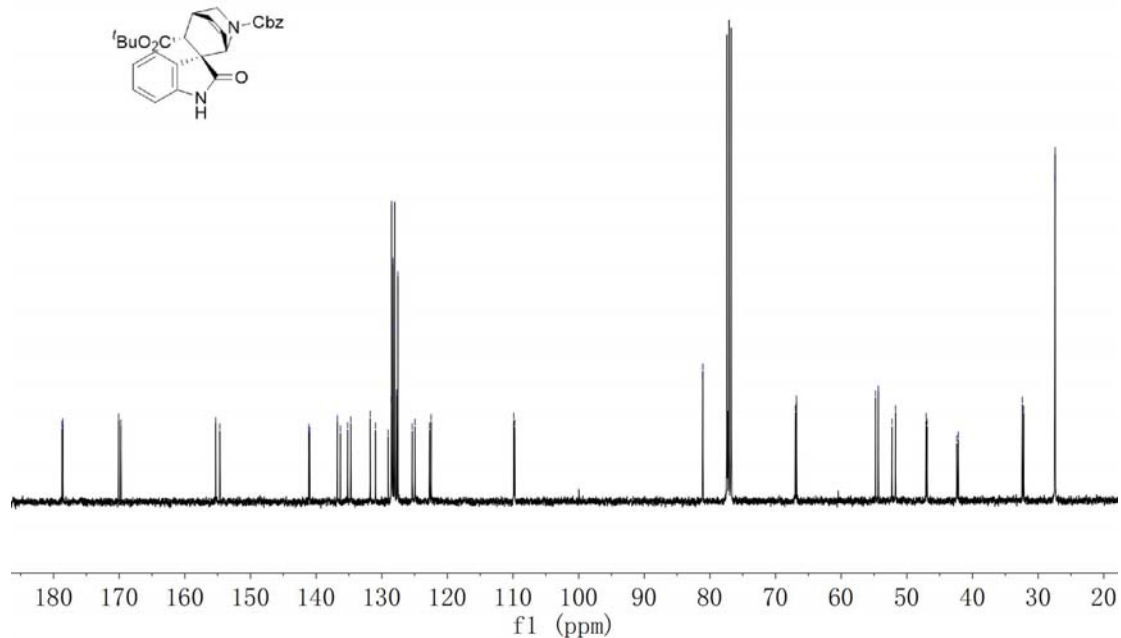

(H) Copies of CD spectra in CH<sub>2</sub>Cl<sub>2</sub>

3a

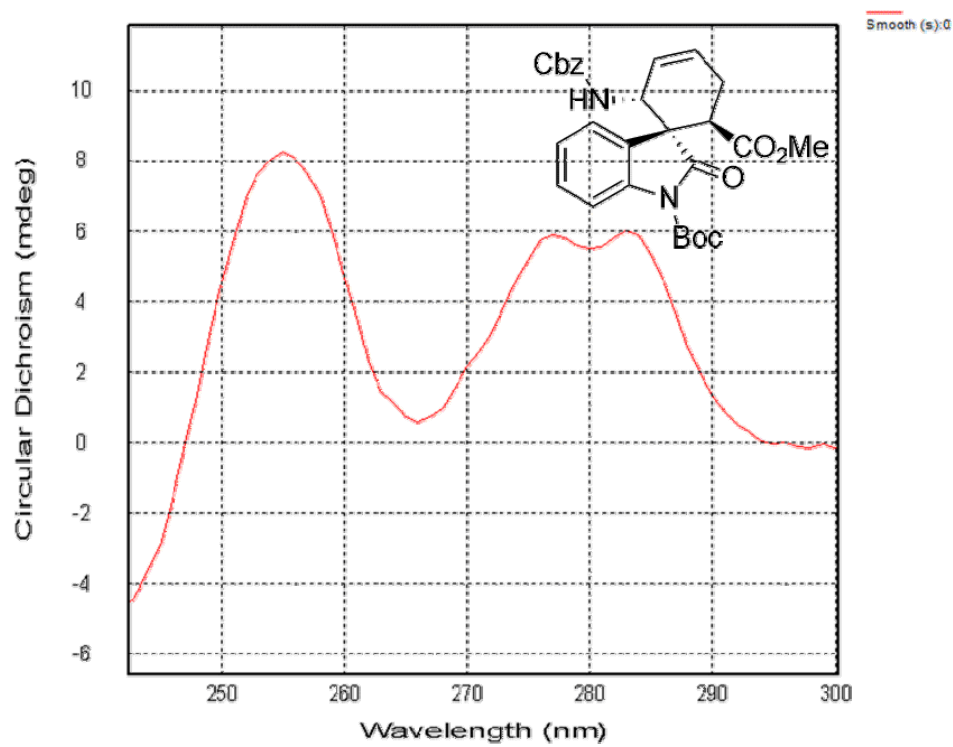

3b

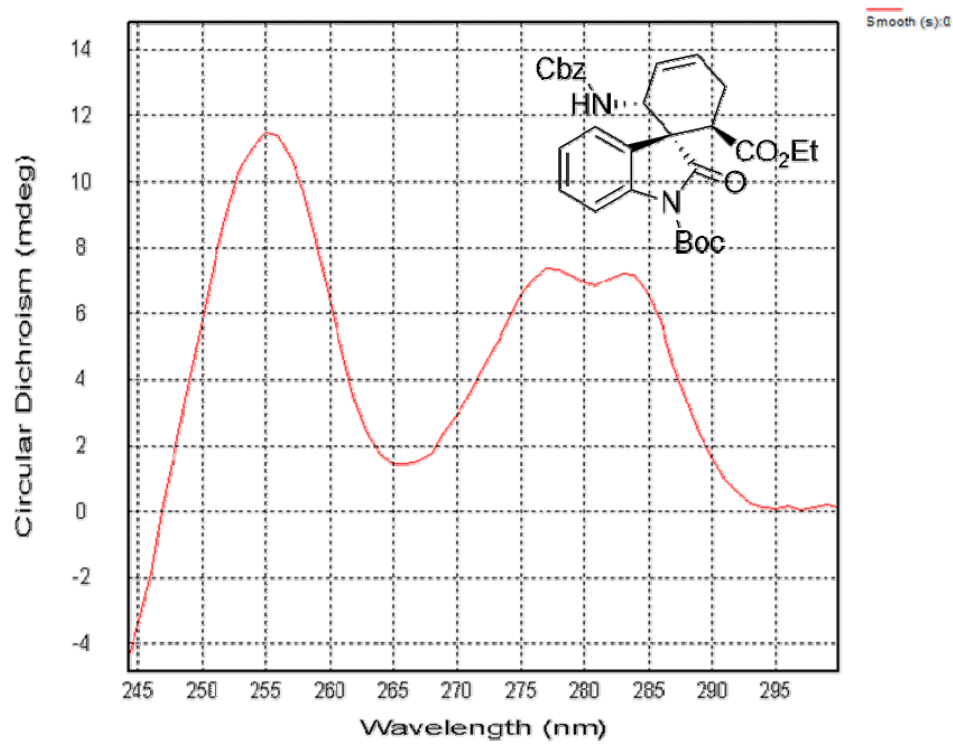

3c

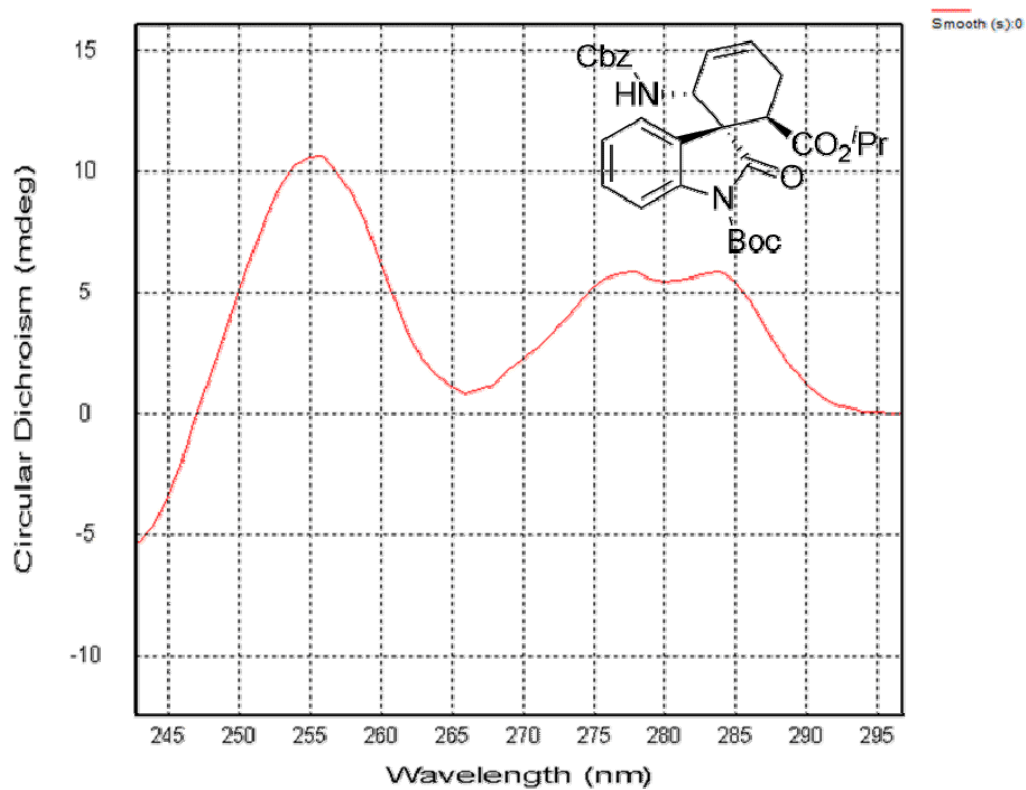

3d

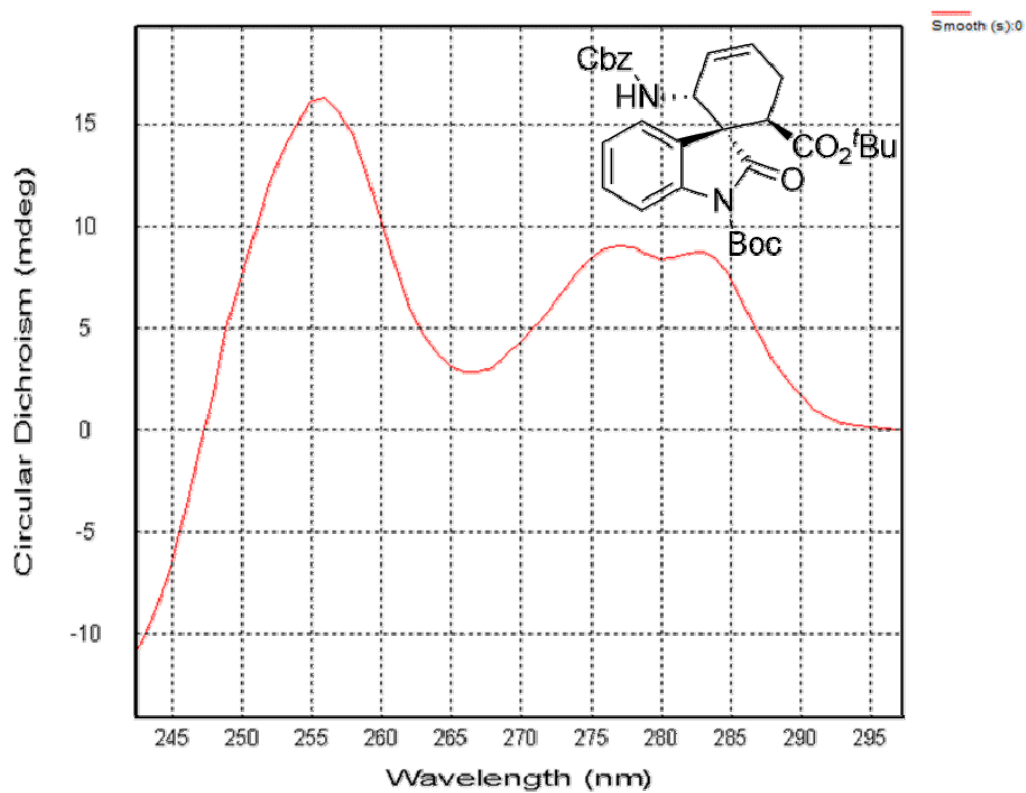

3e

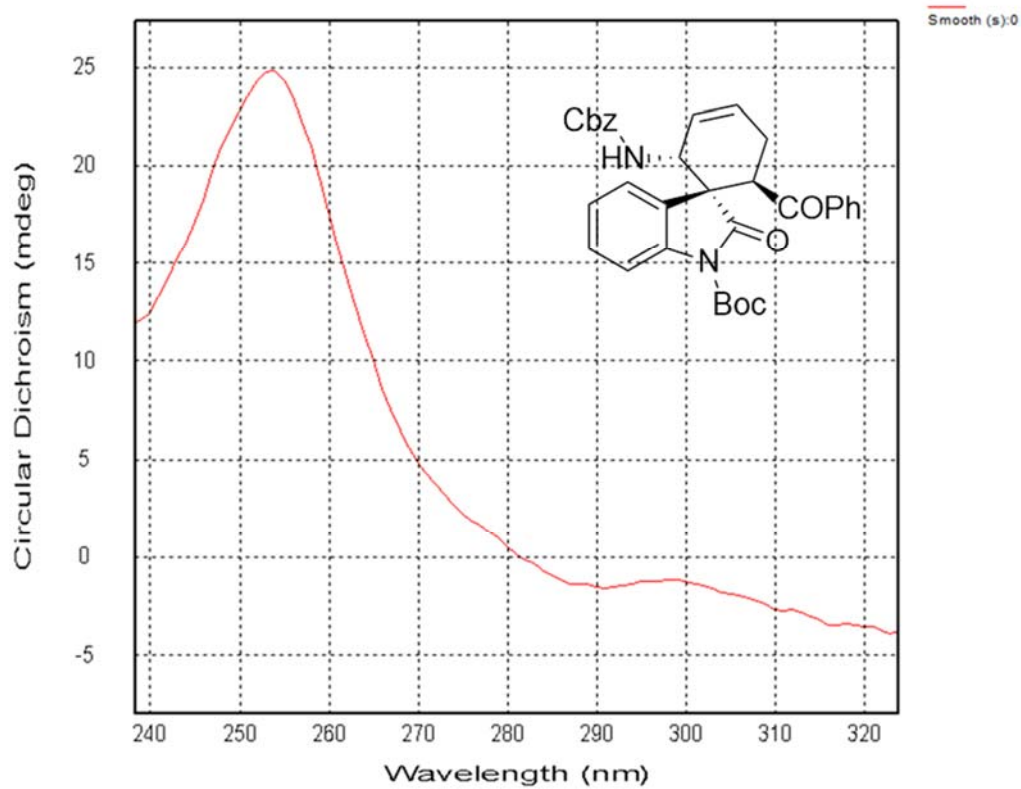

3f

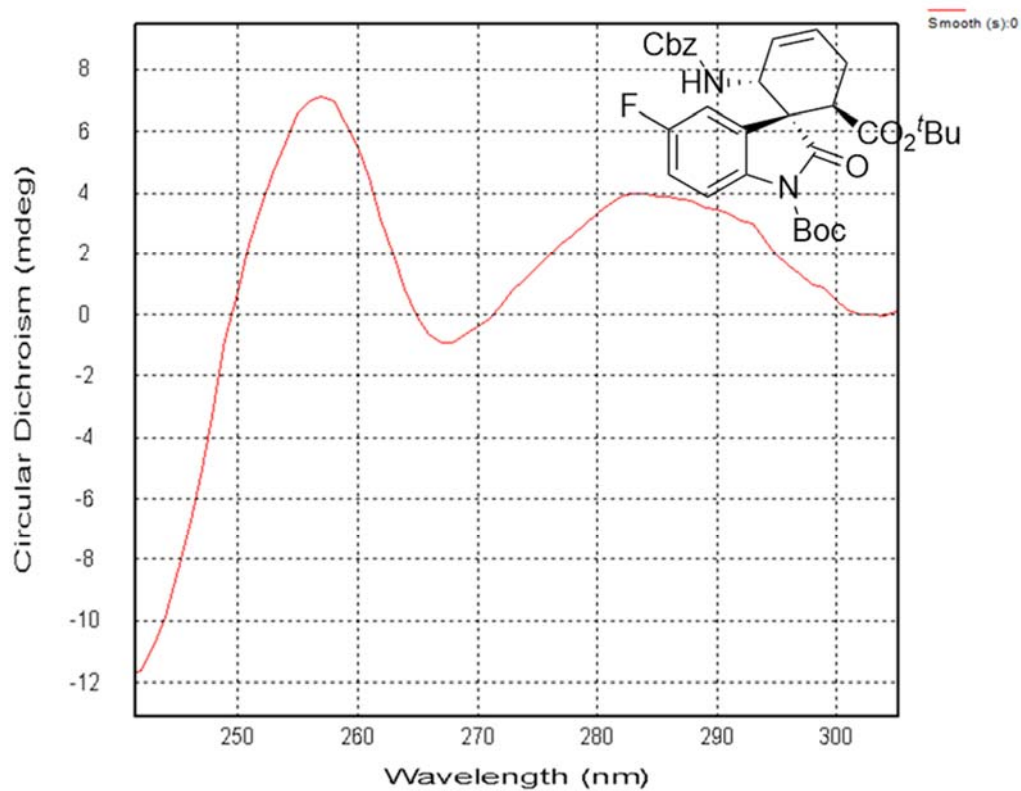

3g

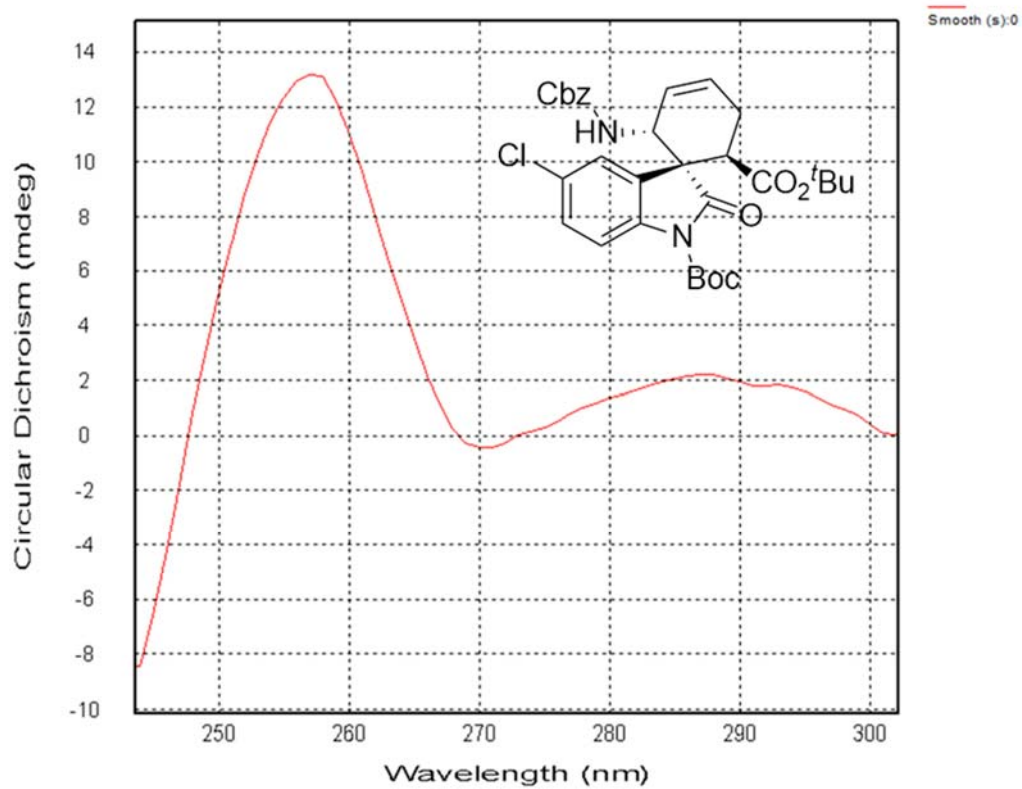

3h

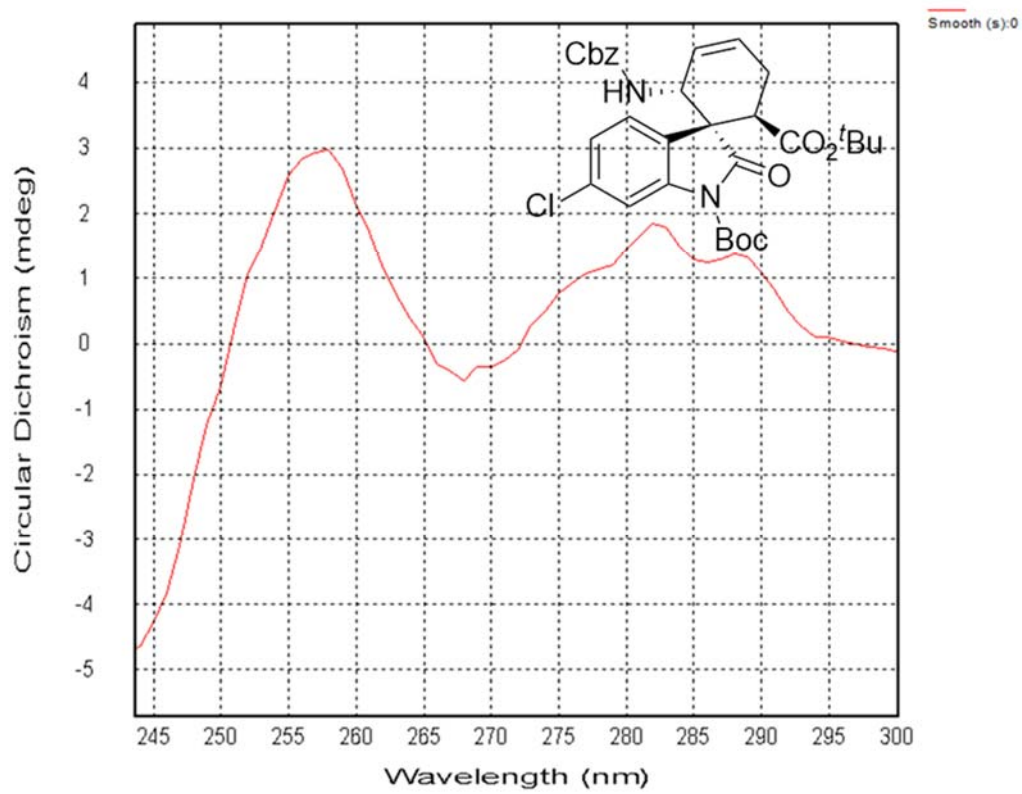



3i

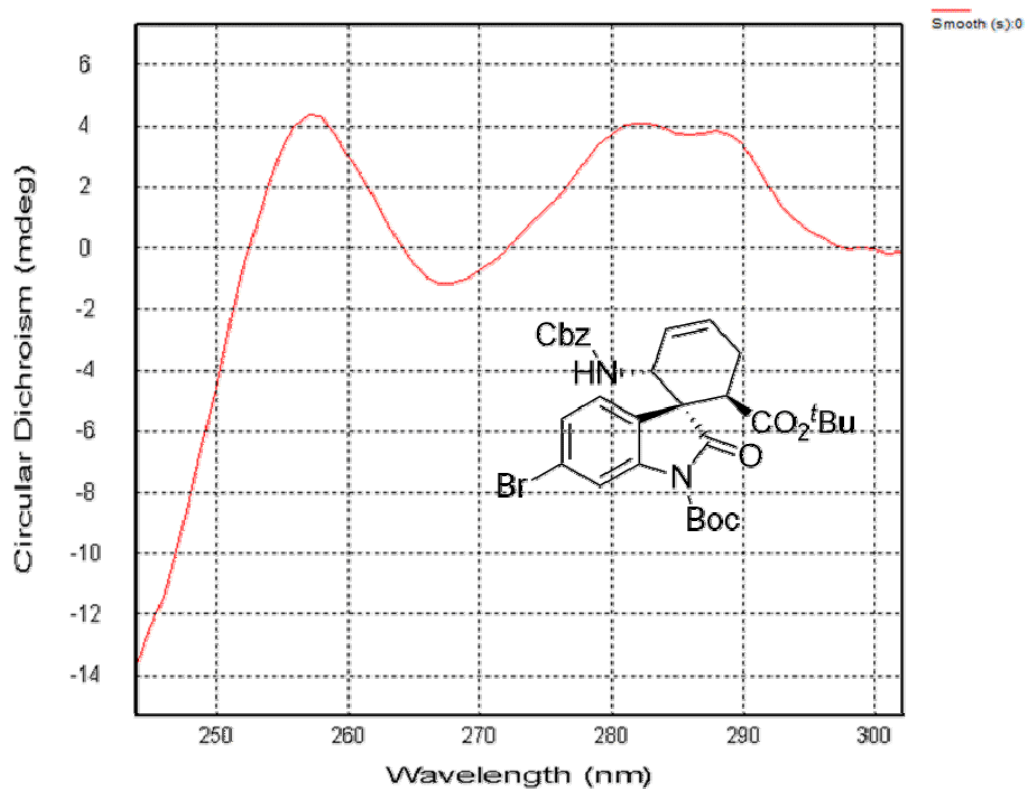

3j

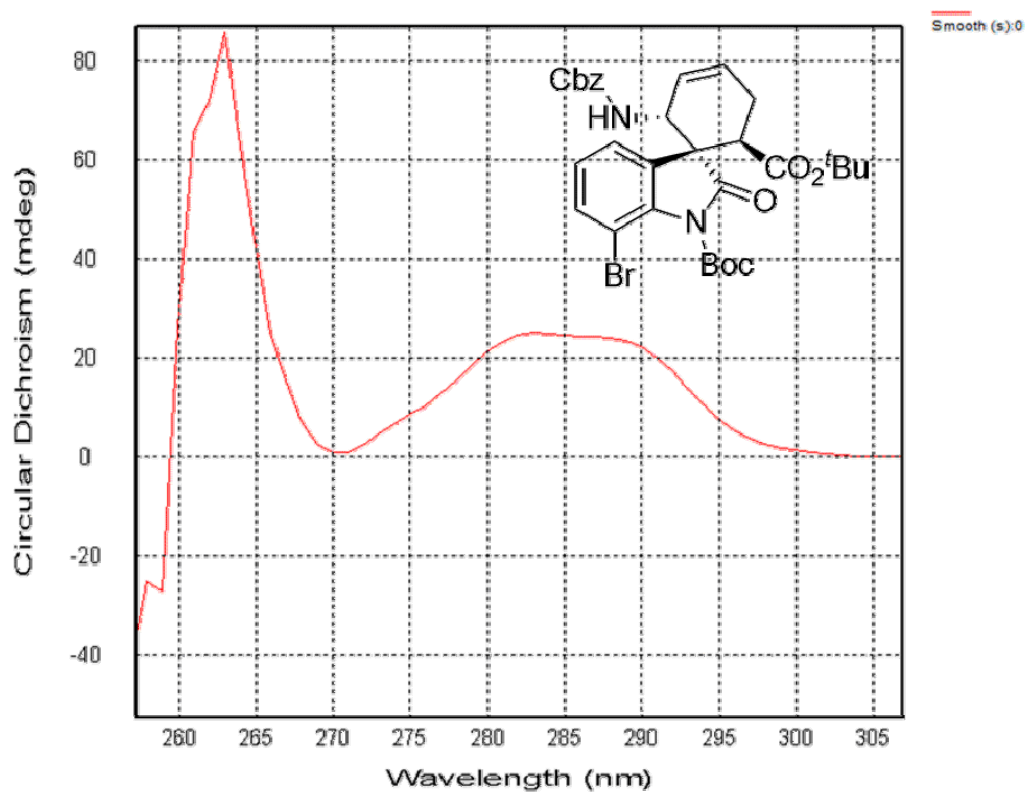

3k

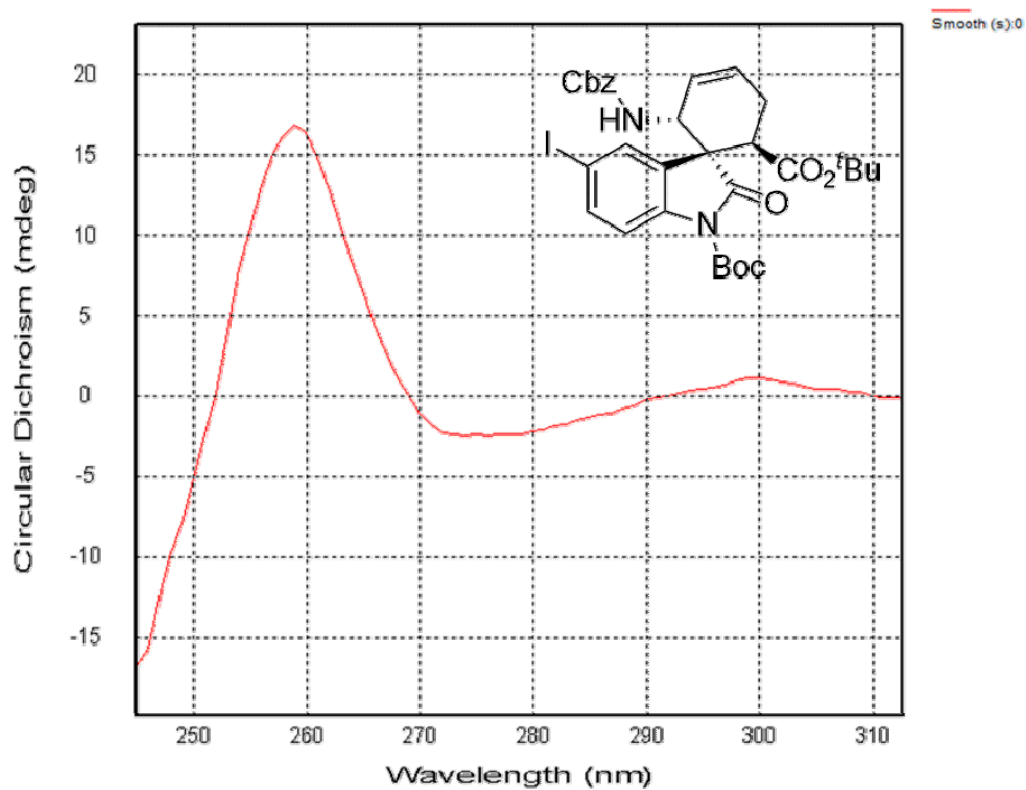

3l

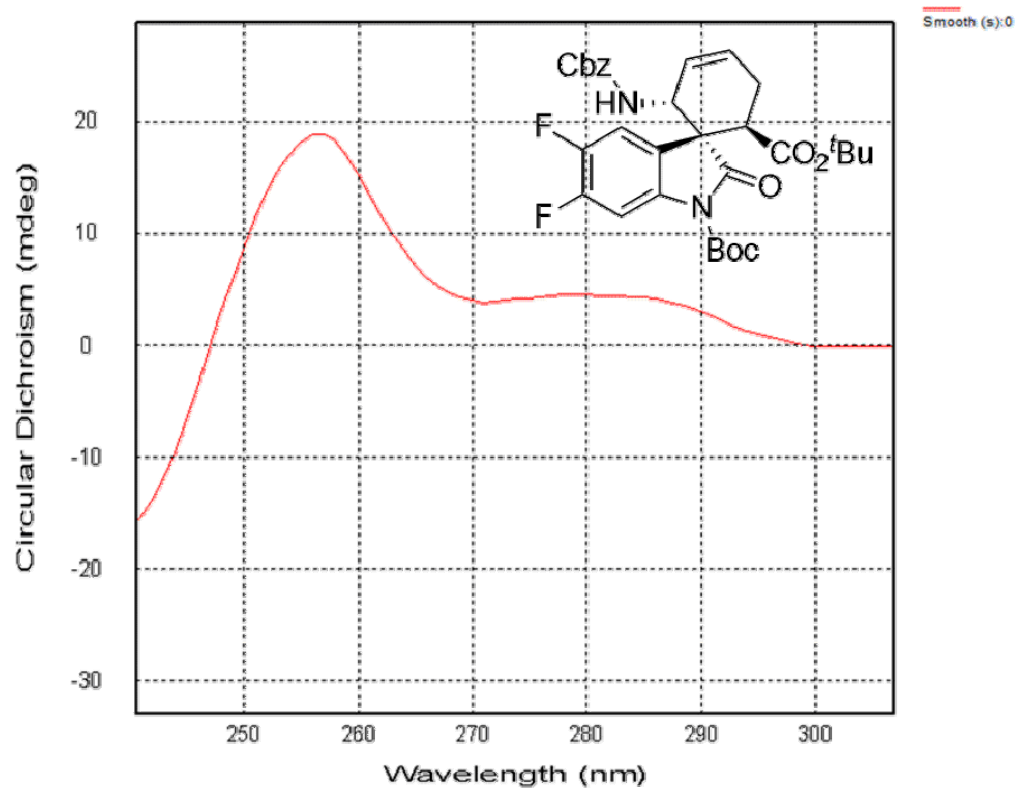



3m

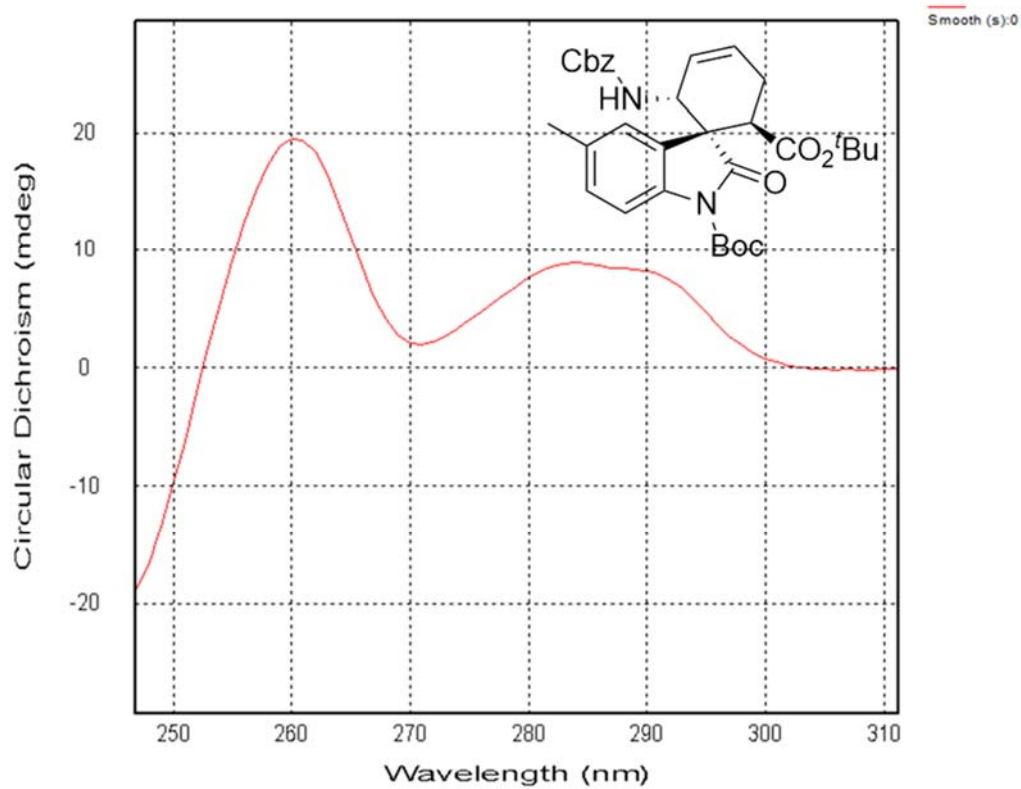

3n

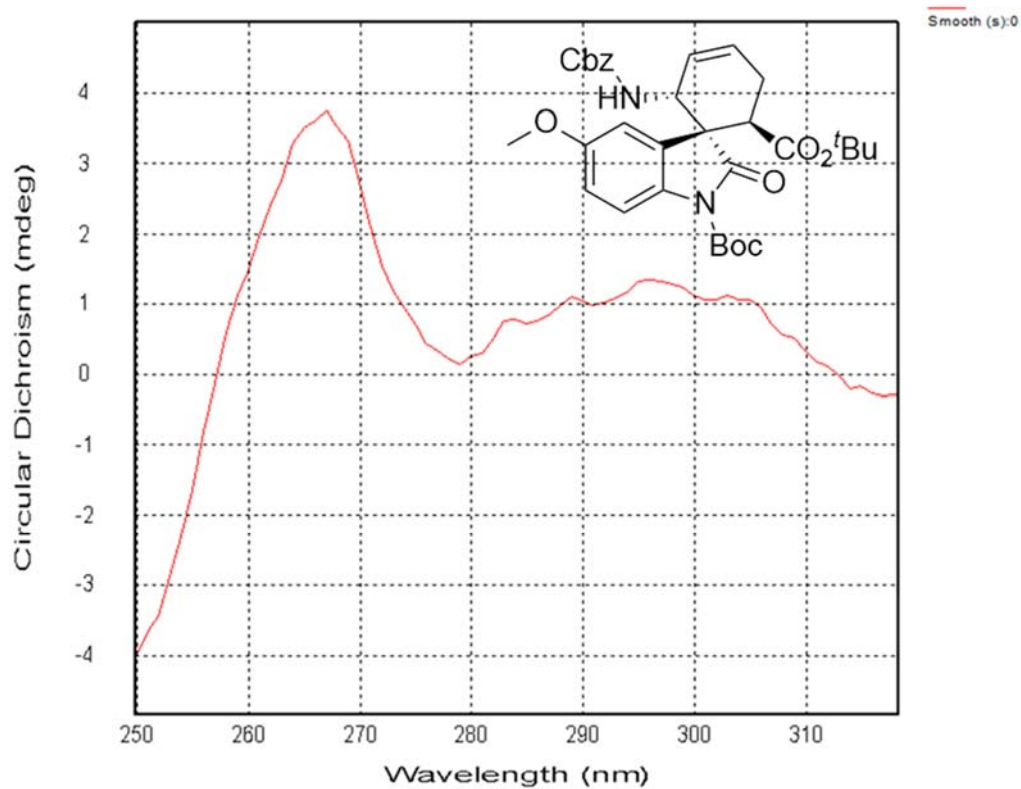

3o

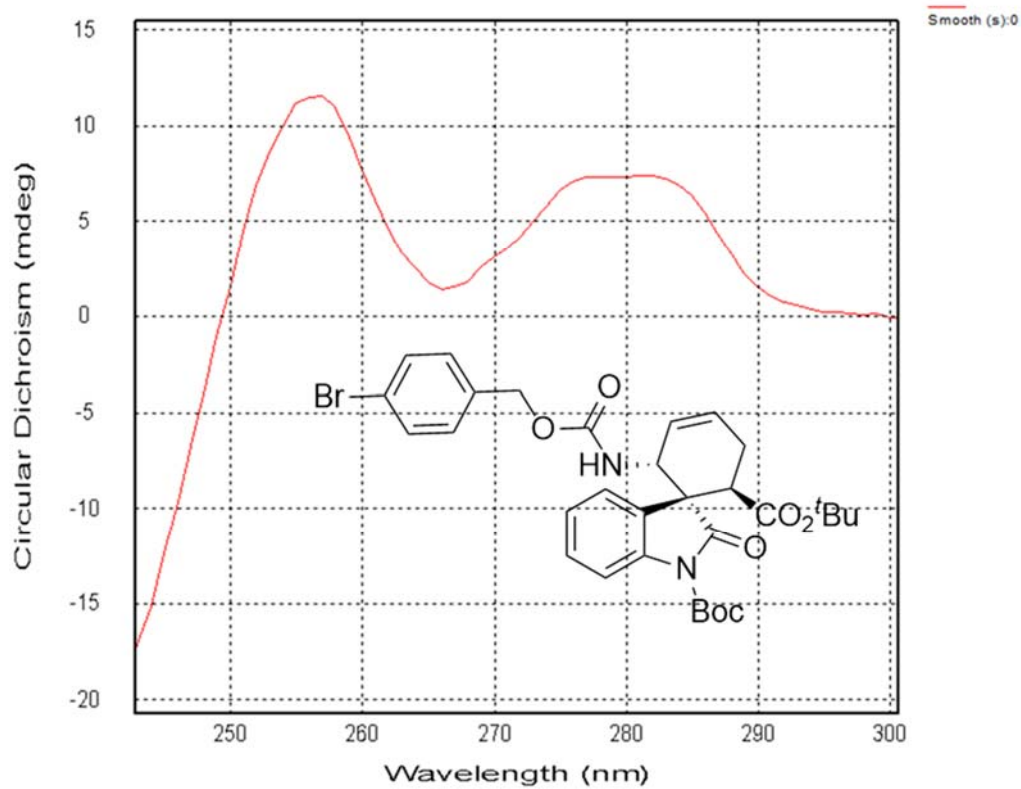

3p

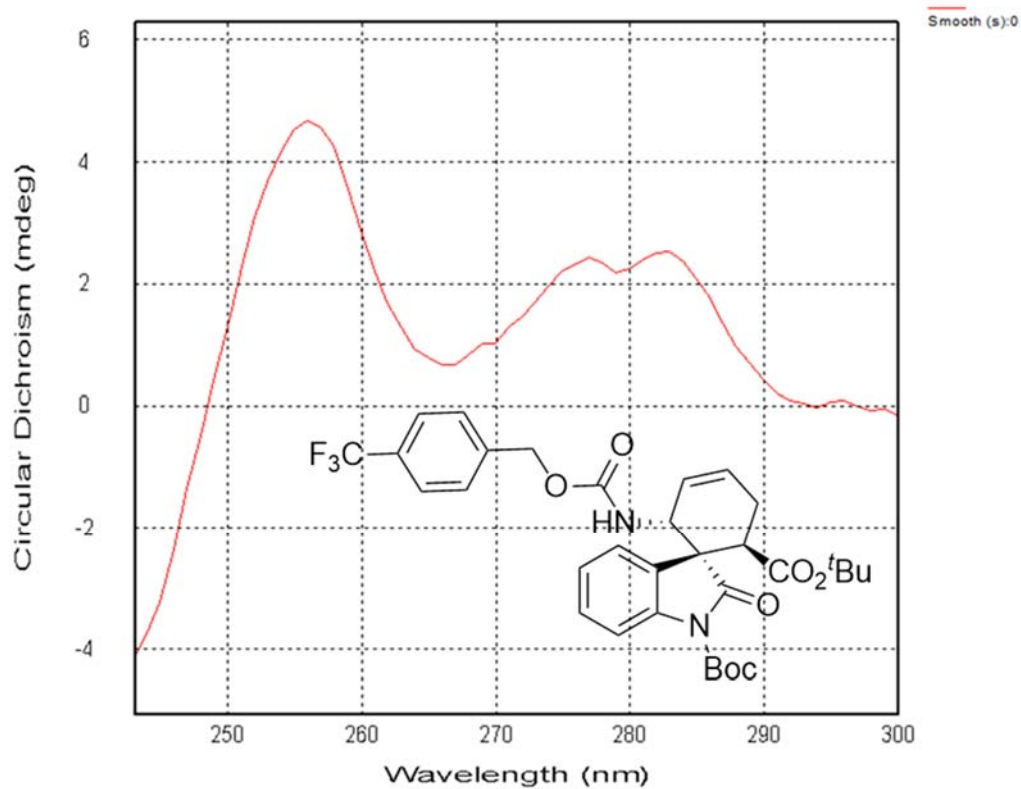

3q

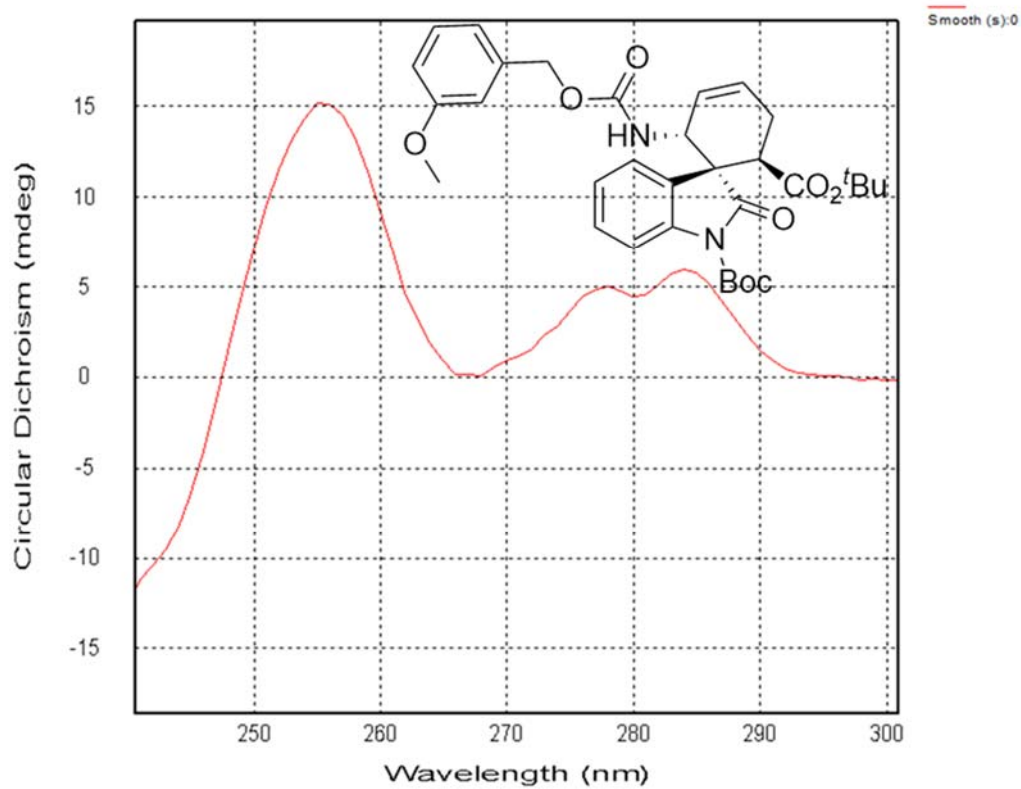

3r

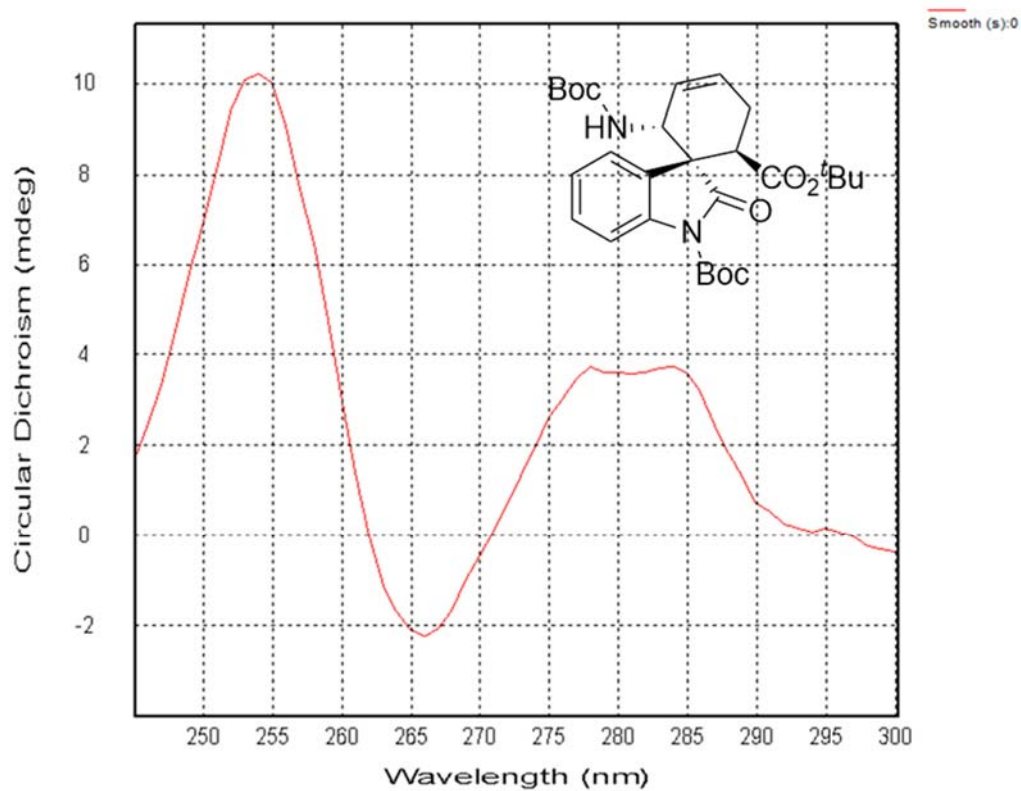

3s

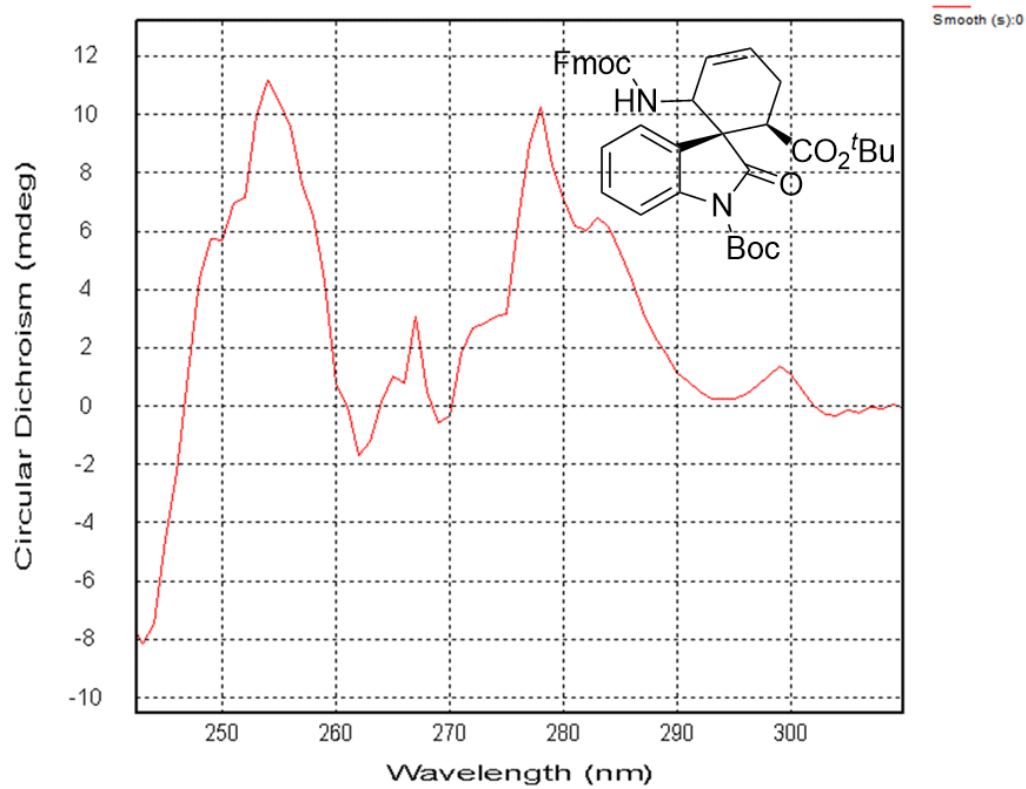

3u

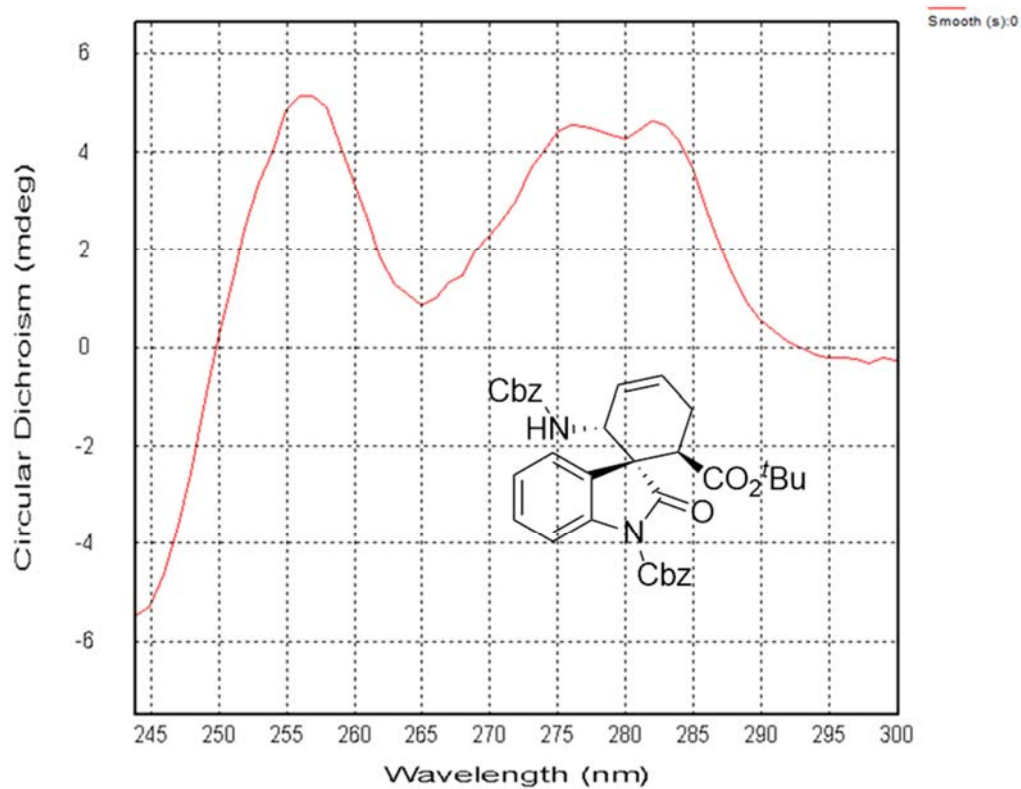

5a

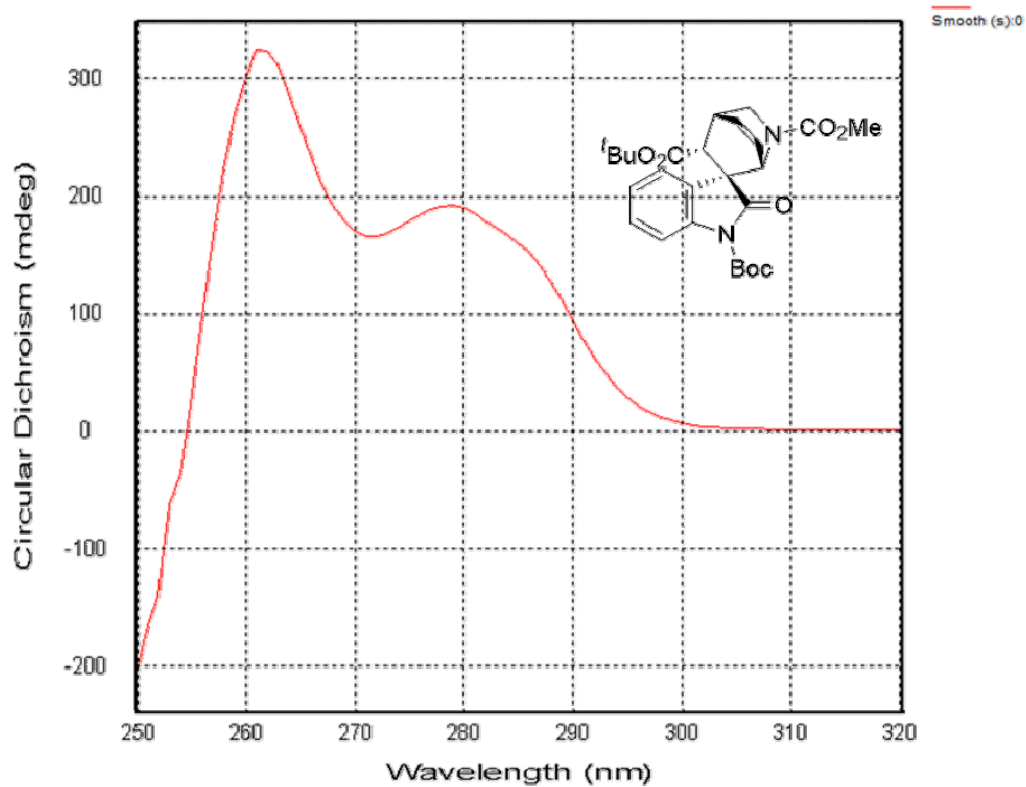

5b

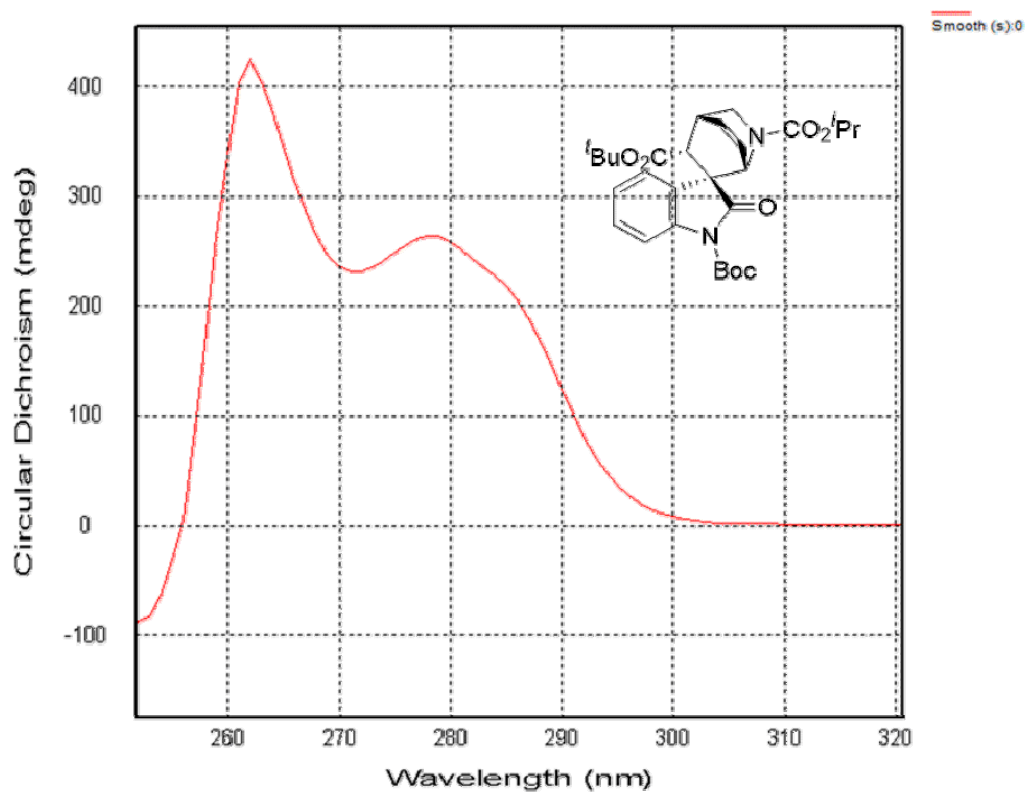

5c

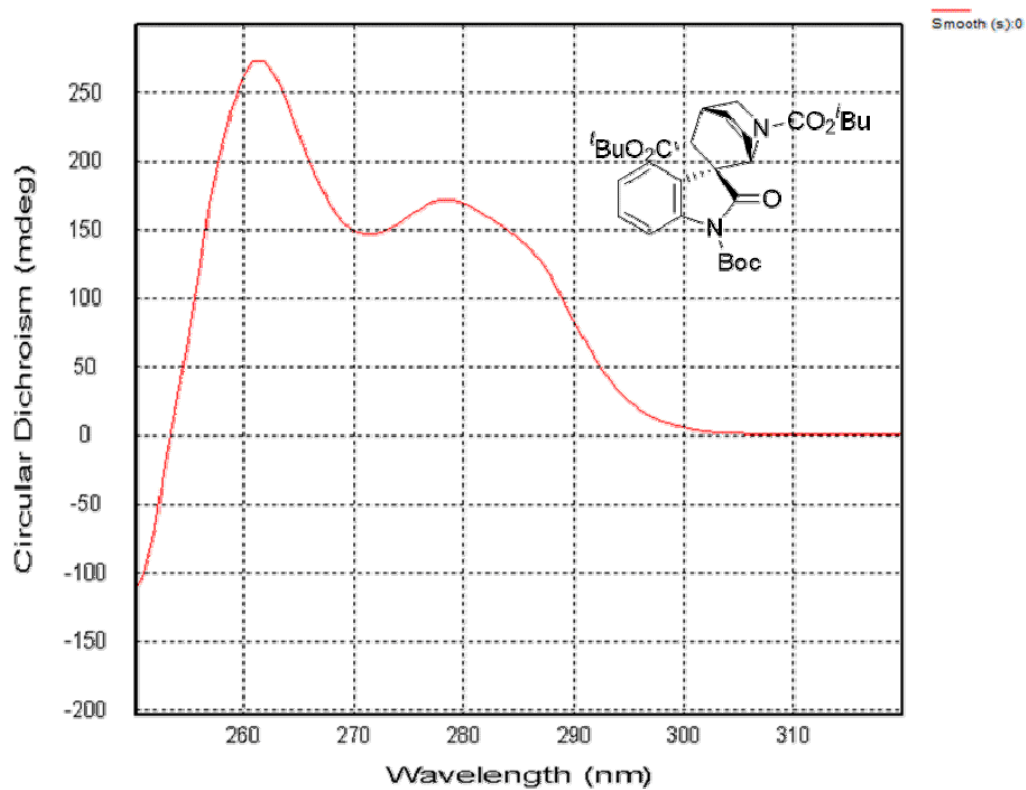

5d

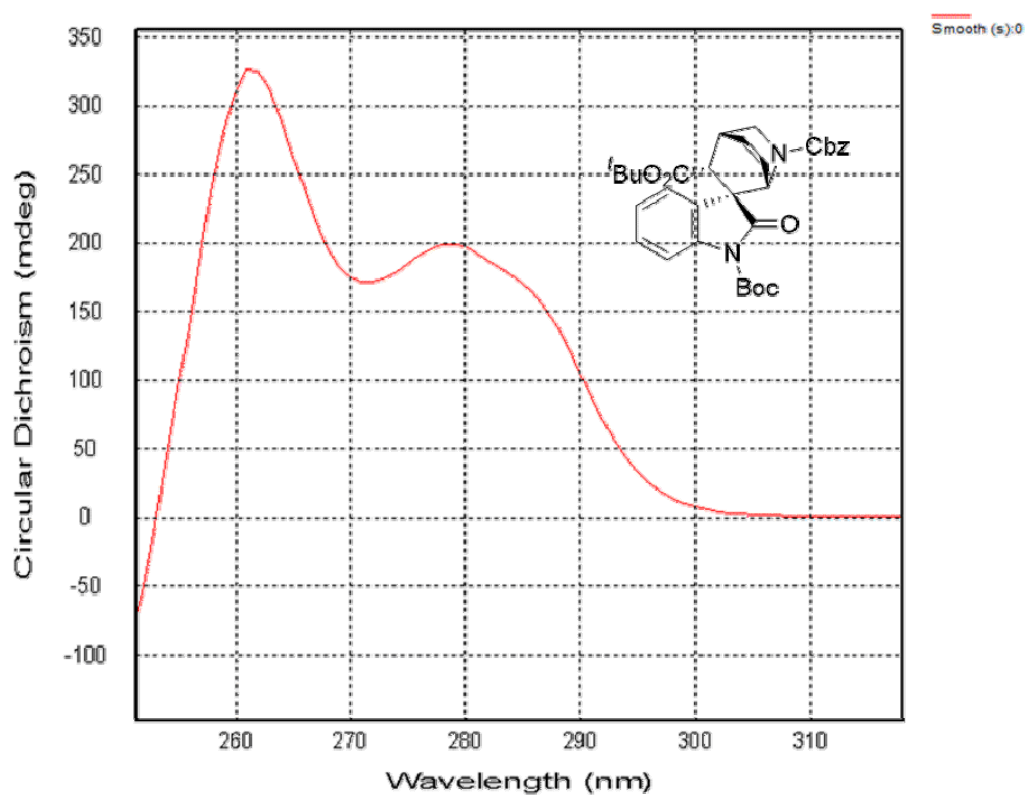

5e

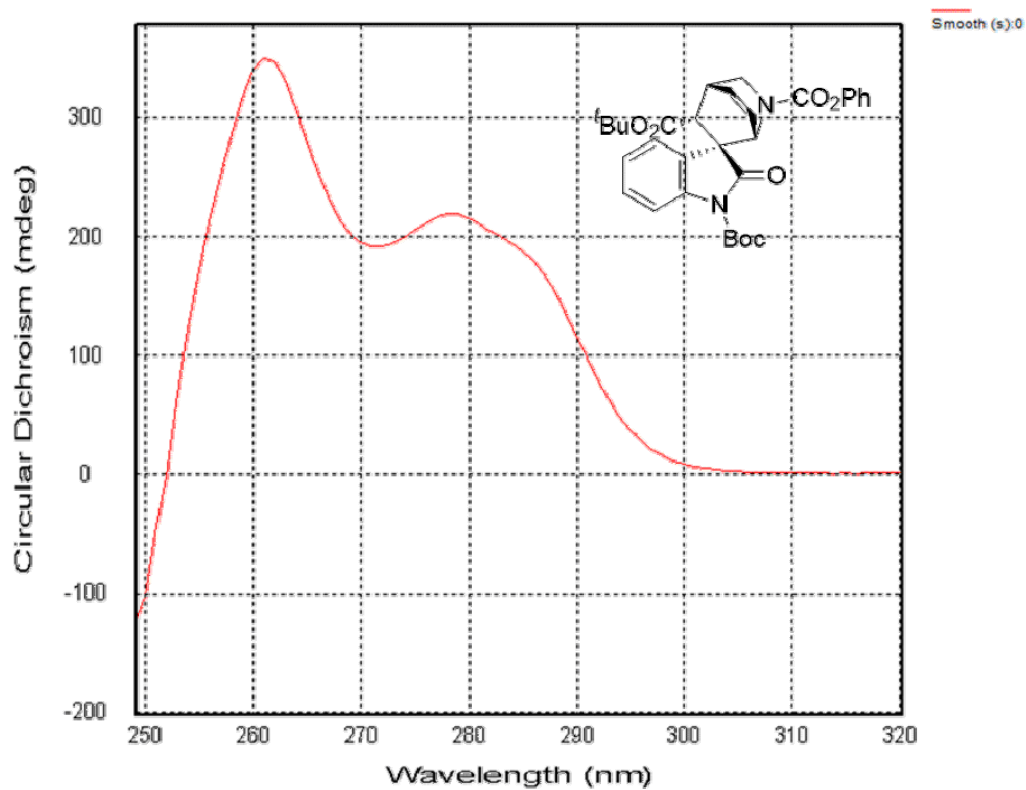

5f

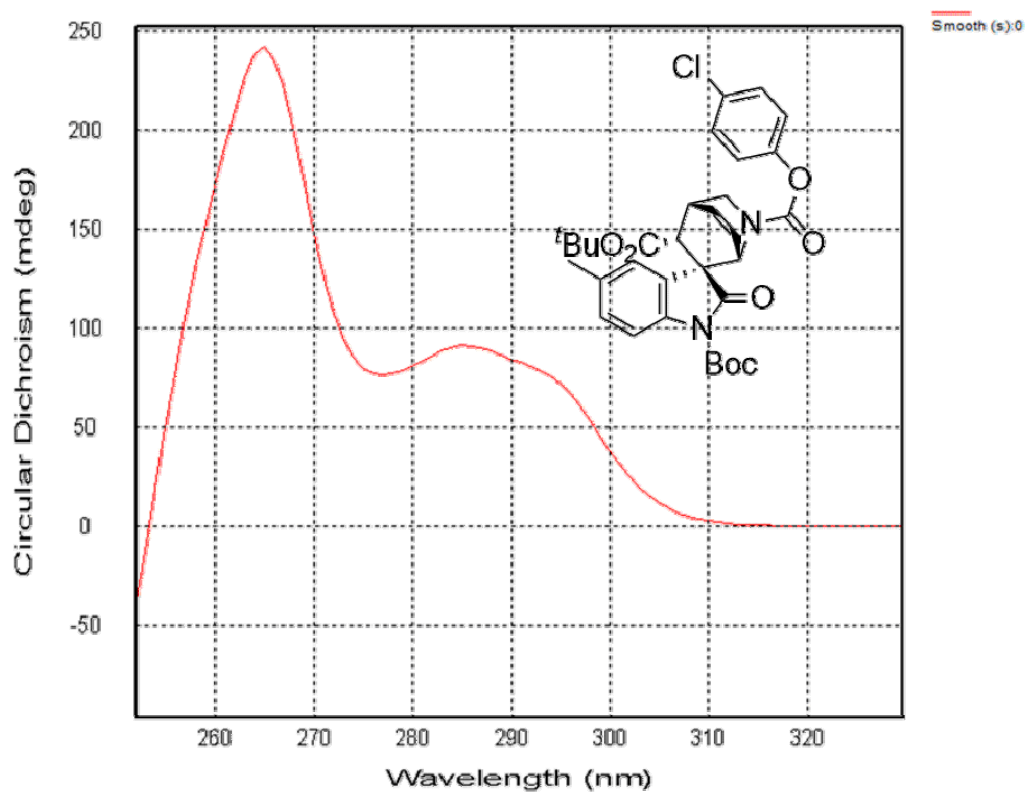



5g

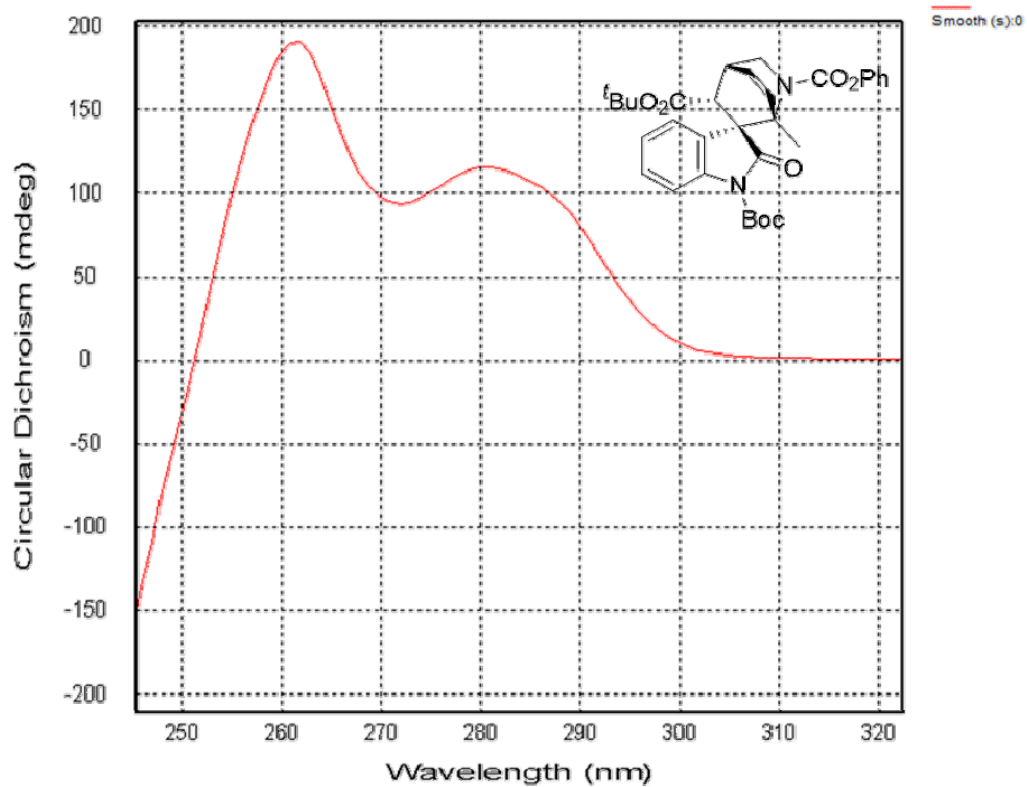

5h

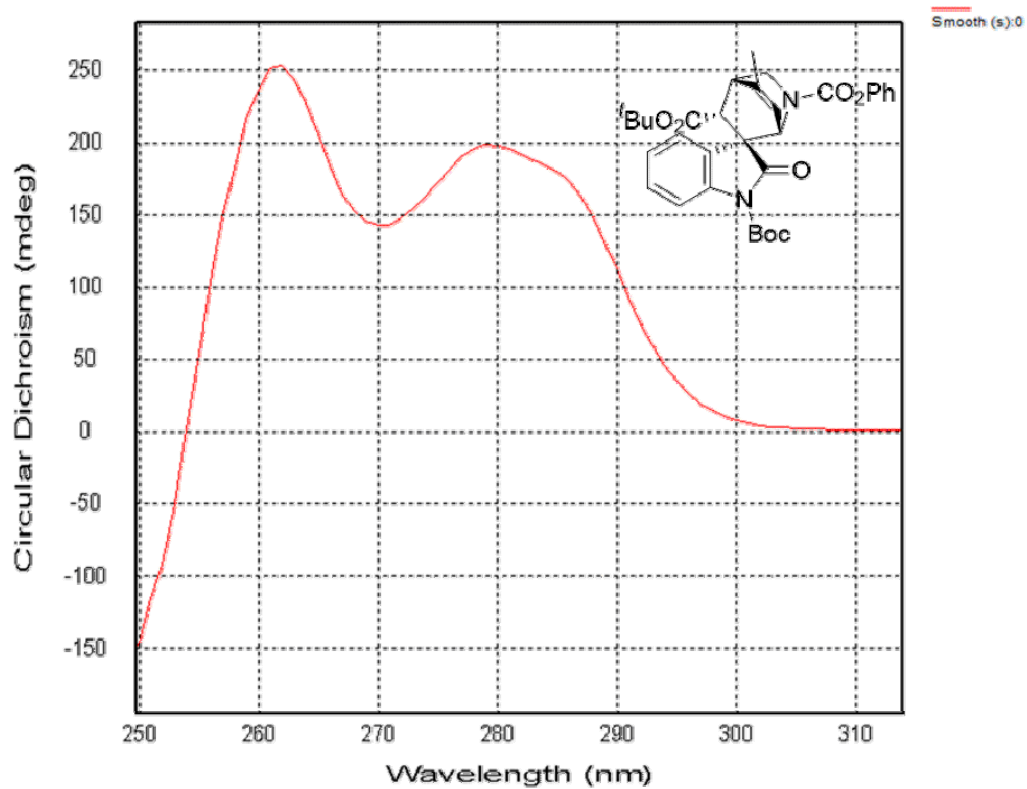



5i

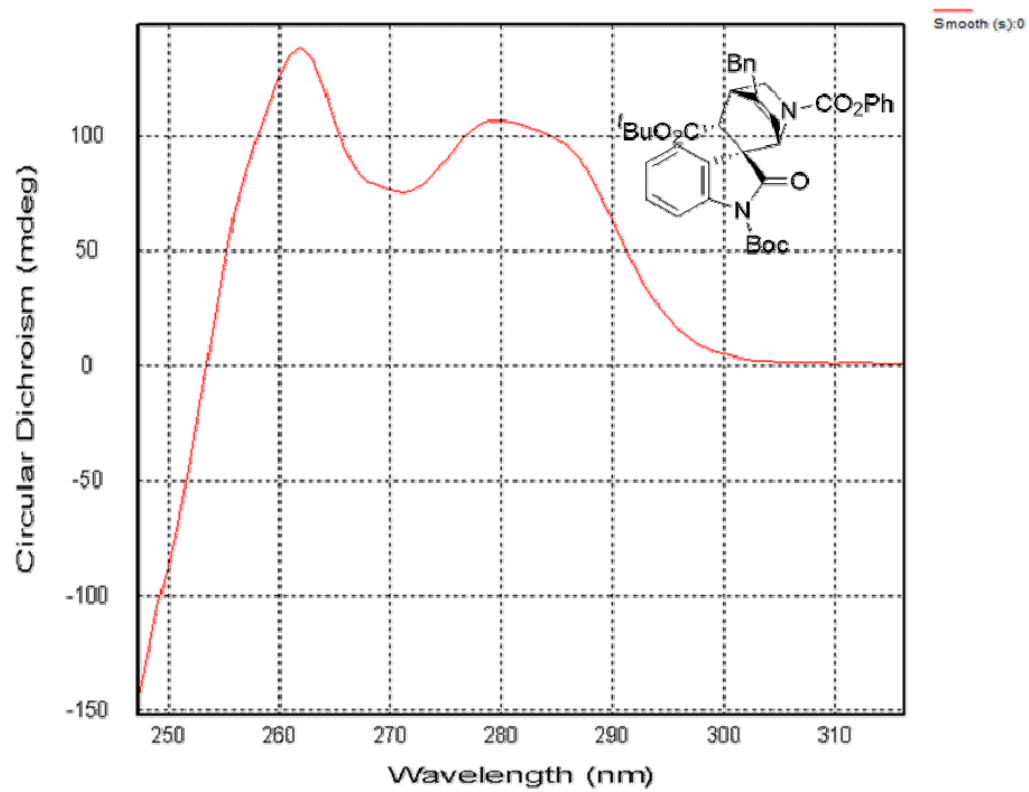

## (I) References

1. (a) Y. H. Wen, X. Huang, J. L. Huang, Y. Xiong, B. Qin and X. M. Feng, *Synlett*, 2005, 2445; (b) Z. P. Yu, X. H. Liu, Z. H. Dong, M. S. Xie and X. M. Feng, *Angew. Chem., Int. Ed.*, 2008, **47**, 1308; (c) K. Zheng, B. Qin, X. H. Liu and X. M. Feng, *J. Org. Chem.*, 2007, **72**, 8478; (d) X. Zhang, D. H. Chen, X. H. Liu and X. M. Feng, *J. Org. Chem.*, 2007, **72**, 5227; (e) X. Zhou, D. J. Shang, Q. Zhang, L. L. Lin, X. H. Liu and X. M. Feng, *Org. Lett.*, 2009, **11**, 1401.
2. B. Tan, N. R. Candeias and C. F. Barbas, III, *J. Am. Chem. Soc.*, 2011, **133**, 4672.
3. L. E. Overman, G. F. Taylor, C. B. Petty and P. J. Jessup, *J. Org. Chem.*, 1978, **43**, 2164.
4. F. W. Fowler, *J. Org. Chem.*, 1972, **37**, 1321.
